# Supplementary material for: QFlow lite dataset: A machine-learning approach to the charge states in quantum dot experiments
Source: PLoS One. 2018 Oct 17;13(10):e0205844. doi: 10.1371/journal.pone.0205844 (PMC6192646; doi:10.1371/journal.pone.0205844)
Supplement: S3 File — The S2 File converted to csv format using the Jupyter notebook-based code provided in S1 File. (CSV) [file pone.0205844.s003.csv]

'V_P1	'V_P2	current	charge	sensor	state
-0.0	-0.0	1.7515700492976917e-18	0.0	0.0	0
-0.0	-0.00404040404040404	2.3929832684242605e-18	0.0	0.0	0
-0.0	-0.00808080808080808	3.084018439370909e-18	0.0	0.0	0
-0.0	-0.012121212121212121	4.364465458672048e-18	0.0	0.0	0
-0.0	-0.01616161616161616	5.884725358925308e-18	0.0	0.0	0
-0.0	-0.0202020202020202	7.996735472765003e-18	0.0	0.0	0
-0.0	-0.024242424242424242	1.0962008217236716e-17	0.0	0.0	0
-0.0	-0.028282828282828285	1.5186252129472806e-17	0.0	0.0	0
-0.0	-0.03232323232323232	2.1372509509394652e-17	0.0	0.0	0
-0.0	-0.03636363636363636	2.9605927651820264e-17	0.0	0.0	0
-0.0	-0.0404040404040404	4.0473957047016806e-17	0.0	0.0	0
-0.0	-0.044444444444444446	6.0498768675189e-17	0.0	0.0	0
-0.0	-0.048484848484848485	8.70012548319468e-17	0.0	0.0	0
-0.0	-0.052525252525252523	1.2754995451417652e-16	0.0	0.0	0
-0.0	-0.05656565656565657	1.9192278852495306e-16	0.0	0.0	0
-0.0	-0.06060606060606061	3.0117655219973605e-16	0.0	0.0	0
-0.0	-0.06464646464646465	4.918366279809308e-16	0.0	0.0	0
-0.0	-0.06868686868686869	2.4794726712799934e-28	0.0	0.01849773111550108	1
-0.0	-0.07272727272727272	2.2842094031396815e-26	0.0	0.01832275923927092	1
-0.0	-0.07676767676767676	5.129312328051185e-25	0.0	0.01814778736304076	1
-0.0	-0.0808080808080808	4.132627295261076e-23	0.0	0.0179728154868106	1
-0.0	-0.08484848484848485	1.888096813273535e-21	0.0	0.017797843610580438	1
-0.0	-0.08888888888888889	5.665452671594383e-20	0.0	0.017622871734350277	1
-0.0	-0.09292929292929293	2.2189707562300285e-18	0.0	0.017447899858120116	1
-0.0	-0.09696969696969697	6.405557852929888e-17	0.0	0.017272927981889955	1
-0.0	-0.10101010101010101	1.5635066248107847e-15	0.0	0.017097956105659794	1
-0.0	-0.10505050505050505	6.019167550214267e-14	0.0	0.016922984229429634	1
-0.0	-0.10909090909090909	1.6090352248970377e-12	0.0	0.016748012353199473	1
-0.0	-0.11313131313131314	3.585682854668666e-11	0.0	0.016573040476969312	1
-0.0	-0.11717171717171718	2.781469807255718e-10	0.0	0.01639806860073915	1
-0.0	-0.12121212121212122	5.82996898901588e-11	1.0	0.0518404729133696	1
-0.0	-0.12525252525252525	3.1747515444889363e-12	1.0	0.05166550103713944	1
-0.0	-0.1292929292929293	1.4241808827317736e-13	1.0	0.05149052916090928	1
-0.0	-0.13333333333333333	4.9151182111897226e-15	1.0	0.05131555728467912	1
-0.0	-0.13737373737373737	2.2141461656778417e-16	1.0	0.05114058540844896	1
-0.0	-0.1414141414141414	1.0432263226799568e-17	1.0	0.0509656135322188	1
-0.0	-0.14545454545454545	4.456893481021734e-19	1.0	0.050790641655988636	1
-0.0	-0.1494949494949495	1.7068537044077322e-19	1.0	0.050615669779758475	1
-0.0	-0.15353535353535352	7.566870834876002e-18	1.0	0.050440697903528314	1
-0.0	-0.15757575757575756	3.493365201852923e-16	1.0	0.050265726027298153	1
-0.0	-0.1616161616161616	1.5372135072797686e-14	1.0	0.05009075415106799	1
-0.0	-0.16565656565656567	5.710713636296382e-13	1.0	0.04991578227483783	1
-0.0	-0.1696969696969697	4.297831746708763e-11	1.0	0.04974081039860767	1
-0.0	-0.17373737373737375	9.411031063818169e-10	1.0	0.04956583852237751	1
-0.0	-0.17777777777777778	4.481639809048099e-10	2.0	0.08500824283500795	1
-0.0	-0.18181818181818182	1.7384431454811567e-11	2.0	0.08483327095877778	1
-0.0	-0.18585858585858586	4.796322391885717e-13	2.0	0.08465829908254763	1
-0.0	-0.1898989898989899	1.5094406120446158e-14	2.0	0.08448332720631747	1
-0.0	-0.19393939393939394	2.576859452416261e-16	2.0	0.0843083553300873	1
-0.0	-0.19797979797979798	8.01543432601201e-18	2.0	0.08413338345385714	1
-0.0	-0.20202020202020202	2.3730757663569056e-17	2.0	0.08395841157762698	1
-0.0	-0.20606060606060606	1.2061322564869394e-15	2.0	0.08378343970139682	1
-0.0	-0.2101010101010101	6.057394781736124e-14	2.0	0.08360846782516666	1
-0.0	-0.21414141414141413	2.609865298460028e-12	2.0	0.0834334959489365	1
-0.0	-0.21818181818181817	1.0948348170577749e-10	2.0	0.08325852407270634	1
-0.0	-0.2222222222222222	3.329185970085457e-09	2.0	0.08308355219647619	1
-0.0	-0.22626262626262628	4.89722580194532e-10	3.0	0.11852595650910663	1
-0.0	-0.23030303030303031	1.3255213782295972e-11	3.0	0.11835098463287647	1
-0.0	-0.23434343434343435	3.4407332064093934e-13	3.0	0.1181760127566463	1
-0.0	-0.2383838383838384	9.277765126534716e-15	3.0	0.11800104088041614	1
-0.0	-0.24242424242424243	2.5225943647466777e-16	3.0	0.11782606900418599	1
-0.0	-0.24646464646464647	8.740533618148608e-17	3.0	0.11765109712795582	1
-0.0	-0.2505050505050505	3.895928546251593e-15	3.0	0.11747612525172567	1
-0.0	-0.2545454545454545	2.243945735935926e-13	3.0	0.11730115337549551	1
-0.0	-0.2585858585858586	3.1907189285410976e-11	3.0	0.11712618149926535	1
-0.0	-0.26262626262626265	1.5130626865981012e-09	3.0	0.11695120962303518	1
-0.0	-0.26666666666666666	7.141323546866367e-09	3.0	0.11677623774680501	1
-0.0	-0.27070707070707073	4.28760067281988e-10	4.0	0.15221864205943547	1
-0.0	-0.27474747474747474	1.0968364984447326e-11	4.0	0.1520436701832053	1
-0.0	-0.2787878787878788	2.638404472749275e-13	4.0	0.15186869830697514	1
-0.0	-0.2828282828282828	6.452512551604945e-15	4.0	0.15169372643074497	1
-0.0	-0.2868686868686869	2.534974707920284e-16	4.0	0.15151875455451483	1
-0.0	-0.2909090909090909	4.70698613376096e-15	4.0	0.15134378267828466	1
-0.0	-0.29494949494949496	1.217483877514931e-12	4.0	0.1511688108020545	1
-0.0	-0.298989898989899	7.083206757357346e-11	4.0	0.15099383892582435	1
-0.0	-0.30303030303030304	3.5840753650900206e-09	4.0	0.15081886704959419	1
-0.0	-0.30707070707070705	1.9269707190174715e-08	4.0	0.15064389517336402	1
-0.0	-0.3111111111111111	1.15964783894271e-09	5.0	0.18608629948599448	1
-0.0	-0.3151515151515151	2.83030130774275e-11	5.0	0.1859113276097643	1
-0.0	-0.3191919191919192	6.461802718403016e-13	5.0	0.18573635573353414	1
-0.0	-0.3232323232323232	1.2346442277777527e-14	5.0	0.18556138385730397	1
-0.0	-0.32727272727272727	1.429513749967157e-15	5.0	0.1853864119810738	1
-0.0	-0.33131313131313134	6.089564098084201e-14	5.0	0.18521144010484364	1
-0.0	-0.33535353535353535	3.2164185838586085e-12	5.0	0.18503646822861353	1
-0.0	-0.3393939393939394	1.797331997312365e-09	5.0	0.18486149635238336	1
-0.0	-0.3434343434343434	4.045637378963844e-08	5.0	0.1846865244761532	1
-0.0	-0.3474747474747475	9.326472216086246e-09	6.0	0.2201289287887836	1
-0.0	-0.3515151515151515	2.3237009926996787e-10	6.0	0.21995395691255348	1
-0.0	-0.35555555555555557	1.2739704708935971e-09	0.0	0.0	0
-0.0	-0.3595959595959596	1.4545041932676175e-09	0.0	0.0	0
-0.0	-0.36363636363636365	1.7038988055130096e-09	0.0	0.0	0
-0.0	-0.36767676767676766	1.8157796445032647e-09	0.0	0.0	0
-0.0	-0.3717171717171717	1.9947011143543246e-09	0.0	0.0	0
-0.0	-0.37575757575757573	2.2174543033772392e-09	0.0	0.0	0
-0.0	-0.3797979797979798	2.4927444371326025e-09	0.0	0.0	0
-0.0	-0.3838383838383838	2.8407677835551176e-09	0.0	0.0	0
-0.0	-0.3878787878787879	3.309082497446036e-09	0.0	0.0	0
-0.0	-0.39191919191919194	4.569505486033413e-09	0.0	0.0	0
-0.0	-0.39595959595959596	4.917777871795951e-09	0.0	0.0	0
-0.0	-0.4	5.160997166999773e-09	0.0	0.0	0
-0.00404040404040404	-0.0	2.2965157134266455e-18	0.0	0.0	0
-0.00404040404040404	-0.00404040404040404	3.108086693360769e-18	0.0	0.0	0
-0.00404040404040404	-0.00808080808080808	4.043742179120842e-18	0.0	0.0	0
-0.00404040404040404	-0.012121212121212121	5.762113245025575e-18	0.0	0.0	0
-0.00404040404040404	-0.01616161616161616	7.789086818148798e-18	0.0	0.0	0
-0.00404040404040404	-0.0202020202020202	1.061250378342325e-17	0.0	0.0	0
-0.00404040404040404	-0.024242424242424242	1.4588798320219116e-17	0.0	0.0	0
-0.00404040404040404	-0.028282828282828285	2.027576561108949e-17	0.0	0.0	0
-0.00404040404040404	-0.03232323232323232	2.8677104996673295e-17	0.0	0.0	0
-0.00404040404040404	-0.03636363636363636	3.948229732258857e-17	0.0	0.0	0
-0.00404040404040404	-0.0404040404040404	5.423748228645081e-17	0.0	0.0	0
-0.00404040404040404	-0.044444444444444446	8.677222404437022e-17	0.0	0.0	0
-0.00404040404040404	-0.048484848484848485	1.2552222140963728e-16	0.0	0.0	0
-0.00404040404040404	-0.052525252525252523	1.85276769520106e-16	0.0	0.0	0
-0.00404040404040404	-0.05656565656565657	2.8120082164955594e-16	0.0	0.0	0
-0.00404040404040404	-0.06060606060606061	4.475141897702264e-16	0.0	0.0	0
-0.00404040404040404	-0.06464646464646465	7.06978999932073e-16	0.0	0.0	0
-0.00404040404040404	-0.06868686868686869	4.784238457841517e-28	0.0	0.01847396680531579	1
-0.00404040404040404	-0.07272727272727272	5.103460517745293e-26	0.0	0.01829899492908563	1
-0.00404040404040404	-0.07676767676767676	9.363546543830864e-25	0.0	0.01812402305285547	1
-0.00404040404040404	-0.0808080808080808	9.695496018061485e-23	0.0	0.01794905117662531	1
-0.00404040404040404	-0.08484848484848485	4.480817220126961e-21	0.0	0.017774079300395148	1
-0.00404040404040404	-0.08888888888888889	1.318452720176294e-19	0.0	0.017599107424164987	1
-0.00404040404040404	-0.09292929292929293	5.0554925173368635e-18	0.0	0.017424135547934826	1
-0.00404040404040404	-0.09696969696969697	1.444610390798484e-16	0.0	0.017249163671704665	1
-0.00404040404040404	-0.10101010101010101	3.3277270062119995e-15	0.0	0.017074191795474505	1
-0.00404040404040404	-0.10505050505050505	1.3712961151919404e-13	0.0	0.016899219919244344	1
-0.00404040404040404	-0.10909090909090909	3.8075133494700455e-12	0.0	0.016724248043014183	1
-0.00404040404040404	-0.11313131313131314	7.673054912945233e-11	0.0	0.016549276166784022	1
-0.00404040404040404	-0.11717171717171718	3.5115575889008335e-10	0.0	0.01637430429055386	1
-0.00404040404040404	-0.12121212121212122	4.7755389253707357e-11	1.0	0.05181670860318431	1
-0.00404040404040404	-0.12525252525252525	2.4931609460027244e-12	1.0	0.05164173672695415	1
-0.00404040404040404	-0.1292929292929293	8.327040659930175e-14	1.0	0.05146676485072399	1
-0.00404040404040404	-0.13333333333333333	3.780431783377542e-15	1.0	0.05129179297449383	1
-0.00404040404040404	-0.13737373737373737	1.721037394360287e-16	1.0	0.05111682109826367	1
-0.00404040404040404	-0.1414141414141414	8.169377267703419e-18	1.0	0.05094184922203351	1
-0.00404040404040404	-0.14545454545454545	3.4571064777898503e-19	1.0	0.050766877345803346	1
-0.00404040404040404	-0.1494949494949495	4.406717906878285e-19	1.0	0.050591905469573185	1
-0.00404040404040404	-0.15353535353535352	2.0752993331264116e-17	1.0	0.050416933593343025	1
-0.00404040404040404	-0.15757575757575756	9.49168488253017e-16	1.0	0.050241961717112864	1
-0.00404040404040404	-0.1616161616161616	3.947207286045051e-14	1.0	0.0500669898408827	1
-0.00404040404040404	-0.16565656565656567	1.4293770958251882e-12	1.0	0.04989201796465254	1
-0.00404040404040404	-0.1696969696969697	1.1768519045284482e-10	1.0	0.04971704608842238	1
-0.00404040404040404	-0.17373737373737375	1.6194667715190972e-09	1.0	0.04954207421219222	1
-0.00404040404040404	-0.17777777777777778	3.474989317774324e-10	2.0	0.08498447852482266	1
-0.00404040404040404	-0.18181818181818182	1.2384338218342323e-11	2.0	0.08480950664859249	1
-0.00404040404040404	-0.18585858585858586	3.7264049043440777e-13	2.0	0.08463453477236234	1
-0.00404040404040404	-0.1898989898989899	1.0920266605382382e-14	2.0	0.08445956289613218	1
-0.00404040404040404	-0.19393939393939394	1.9209888606628774e-16	2.0	0.08428459101990202	1
-0.00404040404040404	-0.19797979797979798	6.305072716036174e-18	2.0	0.08410961914367185	1
-0.00404040404040404	-0.20202020202020202	6.801129151651595e-17	2.0	0.0839346472674417	1
-0.00404040404040404	-0.20606060606060606	3.4666028555465972e-15	2.0	0.08375967539121153	1
-0.00404040404040404	-0.2101010101010101	1.6330835093318983e-13	2.0	0.08358470351498137	1
-0.00404040404040404	-0.21414141414141413	7.135174283445839e-12	2.0	0.0834097316387512	1
-0.00404040404040404	-0.21818181818181817	2.9285539150763014e-10	2.0	0.08323475976252105	1
-0.00404040404040404	-0.2222222222222222	4.263012702544679e-09	2.0	0.0830597878862909	1
-0.00404040404040404	-0.22626262626262628	3.161311458132174e-10	3.0	0.11850219219892133	1
-0.00404040404040404	-0.23030303030303031	8.314493758146841e-12	3.0	0.11832722032269116	1
-0.00404040404040404	-0.23434343434343435	2.1913298873881525e-13	3.0	0.118152248446461	1
-0.00404040404040404	-0.2383838383838384	6.037563825630068e-15	3.0	0.11797727657023085	1
-0.00404040404040404	-0.24242424242424243	1.6243380259163227e-16	3.0	0.11780230469400069	1
-0.00404040404040404	-0.24646464646464647	2.4284620836550814e-16	3.0	0.11762733281777052	1
-0.00404040404040404	-0.2505050505050505	1.1516571500663129e-14	3.0	0.11745236094154038	1
-0.00404040404040404	-0.2545454545454545	2.109982468307752e-12	3.0	0.11727738906531021	1
-0.00404040404040404	-0.2585858585858586	1.1677990015966326e-10	3.0	0.11710241718908004	1
-0.00404040404040404	-0.26262626262626265	4.756909480843619e-09	3.0	0.11692744531284988	1
-0.00404040404040404	-0.26666666666666666	6.8387715719314995e-09	4.0	0.1523698496254803	1
-0.00404040404040404	-0.27070707070707073	2.711728619705699e-10	4.0	0.15219487774925017	1
-0.00404040404040404	-0.27474747474747474	6.692980404755509e-12	4.0	0.15201990587302	1
-0.00404040404040404	-0.2787878787878788	1.6157206064719246e-13	4.0	0.15184493399678983	1
-0.00404040404040404	-0.2828282828282828	4.0099512542942994e-15	4.0	0.15166996212055966	1
-0.00404040404040404	-0.2868686868686869	3.941967462839711e-16	4.0	0.15149499024432952	1
-0.00404040404040404	-0.2909090909090909	1.9558038386393907e-14	4.0	0.15132001836809936	1
-0.00404040404040404	-0.29494949494949496	4.148576471489026e-12	4.0	0.1511450464918692	1
-0.00404040404040404	-0.298989898989899	2.4007649905517764e-10	4.0	0.15097007461563905	1
-0.00404040404040404	-0.30303030303030304	1.0472502477356294e-08	4.0	0.15079510273940888	1
-0.00404040404040404	-0.30707070707070705	1.910685218846179e-08	5.0	0.18623750705203934	1
-0.00404040404040404	-0.3111111111111111	7.346140557243326e-10	5.0	0.18606253517580917	1
-0.00404040404040404	-0.3151515151515151	1.719227370959981e-11	5.0	0.185887563299579	1
-0.00404040404040404	-0.3191919191919192	3.9189189090485083e-13	5.0	0.18571259142334884	1
-0.00404040404040404	-0.3232323232323232	9.278460034422759e-15	5.0	0.18553761954711867	1
-0.00404040404040404	-0.32727272727272727	4.945858794846591e-15	5.0	0.1853626476708885	1
-0.00404040404040404	-0.33131313131313134	2.1258522676236961e-13	5.0	0.18518767579465834	1
-0.00404040404040404	-0.33535353535353535	1.1292079998143116e-11	5.0	0.18501270391842822	1
-0.00404040404040404	-0.3393939393939394	6.557222954941484e-09	5.0	0.18483773204219806	1
-0.00404040404040404	-0.3434343434343434	6.800221098129574e-08	5.0	0.1846627601659679	1
-0.00404040404040404	-0.3474747474747475	6.0867938734033365e-09	6.0	0.2201051644785983	1
-0.00404040404040404	-0.3515151515151515	1.4343118408110863e-10	6.0	0.21993019260236818	1
-0.00404040404040404	-0.35555555555555557	2.008833363163035e-09	0.0	0.0	0
-0.00404040404040404	-0.3595959595959596	2.364975739812321e-09	0.0	0.0	0
-0.00404040404040404	-0.36363636363636365	2.5966155812991862e-09	0.0	0.0	0
-0.00404040404040404	-0.36767676767676766	2.8973399685682462e-09	0.0	0.0	0
-0.00404040404040404	-0.3717171717171717	3.2972118888137795e-09	0.0	0.0	0
-0.00404040404040404	-0.37575757575757573	3.862408351487239e-09	0.0	0.0	0
-0.00404040404040404	-0.3797979797979798	4.448751816916215e-09	0.0	0.0	0
-0.00404040404040404	-0.3838383838383838	4.722714906095633e-09	0.0	0.0	0
-0.00404040404040404	-0.3878787878787879	5.555030256537393e-09	0.0	0.0	0
-0.00404040404040404	-0.39191919191919194	5.795856817513605e-09	0.0	0.0	0
-0.00404040404040404	-0.39595959595959596	5.946415450627947e-09	0.0	0.0	0
-0.00404040404040404	-0.4	6.0133342670600414e-09	0.0	0.0	0
-0.00808080808080808	-0.0	3.2695754394437474e-18	0.0	0.0	0
-0.00808080808080808	-0.00404040404040404	4.406343572691246e-18	0.0	0.0	0
-0.00808080808080808	-0.00808080808080808	5.728376335601663e-18	0.0	0.0	0
-0.00808080808080808	-0.012121212121212121	8.103618117980319e-18	0.0	0.0	0
-0.00808080808080808	-0.01616161616161616	1.0956117095621187e-17	0.0	0.0	0
-0.00808080808080808	-0.0202020202020202	1.4930251518532163e-17	0.0	0.0	0
-0.00808080808080808	-0.024242424242424242	2.0526967666396035e-17	0.0	0.0	0
-0.00808080808080808	-0.028282828282828285	2.8528618050754193e-17	0.0	0.0	0
-0.00808080808080808	-0.03232323232323232	4.037022794809371e-17	0.0	0.0	0
-0.00808080808080808	-0.03636363636363636	5.5426948606114916e-17	0.0	0.0	0
-0.00808080808080808	-0.0404040404040404	7.682844149616139e-17	0.0	0.0	0
-0.00808080808080808	-0.044444444444444446	1.173983278104055e-16	0.0	0.0	0
-0.00808080808080808	-0.048484848484848485	1.7052875350959223e-16	0.0	0.0	0
-0.00808080808080808	-0.052525252525252523	2.529726743321551e-16	0.0	0.0	0
-0.00808080808080808	-0.05656565656565657	3.8655347769562277e-16	0.0	0.0	0
-0.00808080808080808	-0.06060606060606061	6.229867156302253e-16	0.0	0.0	0
-0.00808080808080808	-0.06464646464646465	9.532637874301134e-16	0.0	0.0	0
-0.00808080808080808	-0.06868686868686869	8.7641268619858e-28	0.0	0.018450202495130498	1
-0.00808080808080808	-0.07272727272727272	1.0957393453571482e-25	0.0	0.018275230618900337	1
-0.00808080808080808	-0.07676767676767676	7.069223974775972e-24	0.0	0.018100258742670176	1
-0.00808080808080808	-0.0808080808080808	2.0089604725428606e-22	0.0	0.017925286866440016	1
-0.00808080808080808	-0.08484848484848485	1.0078900037552096e-20	0.0	0.017750314990209855	1
-0.00808080808080808	-0.08888888888888889	2.804094616380829e-19	0.0	0.017575343113979694	1
-0.00808080808080808	-0.09292929292929293	1.1521572692520745e-17	0.0	0.017400371237749533	1
-0.00808080808080808	-0.09696969696969697	3.283016981024864e-16	0.0	0.017225399361519372	1
-0.00808080808080808	-0.10101010101010101	1.13407130638734e-14	0.0	0.01705042748528921	1
-0.00808080808080808	-0.10505050505050505	3.145688133062876e-13	0.0	0.01687545560905905	1
-0.00808080808080808	-0.10909090909090909	8.733616419959607e-12	0.0	0.01670048373282889	1
-0.00808080808080808	-0.11313131313131314	2.0868492513930744e-10	0.0	0.01652551185659873	1
-0.00808080808080808	-0.11717171717171718	4.217391633499259e-10	1.0	0.05196791616922918	1
-0.00808080808080808	-0.12121212121212122	4.129435140735512e-11	1.0	0.05179294429299902	1
-0.00808080808080808	-0.12525252525252525	2.054085330640861e-12	1.0	0.05161797241676886	1
-0.00808080808080808	-0.1292929292929293	6.476710837454208e-14	1.0	0.0514430005405387	1
-0.00808080808080808	-0.13333333333333333	2.9627637683586476e-15	1.0	0.05126802866430854	1
-0.00808080808080808	-0.13737373737373737	1.3725476896952334e-16	1.0	0.05109305678807838	1
-0.00808080808080808	-0.1414141414141414	6.3544936752505704e-18	1.0	0.05091808491184822	1
-0.00808080808080808	-0.14545454545454545	2.2749630778669487e-19	1.0	0.050743113035618057	1
-0.00808080808080808	-0.1494949494949495	1.1964258630309843e-18	1.0	0.050568141159387896	1
-0.00808080808080808	-0.15353535353535352	5.656501611870847e-17	1.0	0.050393169283157735	1
-0.00808080808080808	-0.15757575757575756	2.5580931922262246e-15	1.0	0.050218197406927574	1
-0.00808080808080808	-0.1616161616161616	1.0044528376707276e-13	1.0	0.05004322553069741	1
-0.00808080808080808	-0.16565656565656567	7.443137034130628e-12	1.0	0.04986825365446725	1
-0.00808080808080808	-0.1696969696969697	2.9799126379031476e-10	1.0	0.04969328177823709	1
-0.00808080808080808	-0.17373737373737375	2.1776339197467505e-09	1.0	0.04951830990200693	1
-0.00808080808080808	-0.17777777777777778	2.470248612892734e-10	2.0	0.08496071421463737	1
-0.00808080808080808	-0.18181818181818182	8.120122492630884e-12	2.0	0.0847857423384072	1
-0.00808080808080808	-0.18585858585858586	2.4867000954755904e-13	2.0	0.08461077046217705	1
-0.00808080808080808	-0.1898989898989899	4.347995674923882e-15	2.0	0.0844357985859469	1
-0.00808080808080808	-0.19393939393939394	1.2724981144123872e-16	2.0	0.08426082670971673	1
-0.00808080808080808	-0.19797979797979798	8.03457518964406e-18	2.0	0.08408585483348656	1
-0.00808080808080808	-0.20202020202020202	2.227721860378861e-16	2.0	0.0839108829572564	1
-0.00808080808080808	-0.20606060606060606	1.0282916996368021e-14	2.0	0.08373591108102624	1
-0.00808080808080808	-0.2101010101010101	4.538428514200935e-13	2.0	0.08356093920479608	1
-0.00808080808080808	-0.21414141414141413	1.9849809601952076e-11	2.0	0.08338596732856592	1
-0.00808080808080808	-0.21818181818181817	1.799345727041358e-09	2.0	0.08321099545233576	1
-0.00808080808080808	-0.2222222222222222	4.404753118550725e-09	3.0	0.11865339976496622	1
-0.00808080808080808	-0.22626262626262628	2.0344719075876792e-10	3.0	0.11847842788873605	1
-0.00808080808080808	-0.23030303030303031	5.324194823361523e-12	3.0	0.11830345601250589	1
-0.00808080808080808	-0.23434343434343435	1.431742953131692e-13	3.0	0.11812848413627572	1
-0.00808080808080808	-0.2383838383838384	3.786419346067799e-15	3.0	0.11795351226004556	1
-0.00808080808080808	-0.24242424242424243	1.160254492902955e-16	3.0	0.11777854038381541	1
-0.00808080808080808	-0.24646464646464647	7.209386317729344e-16	3.0	0.11760356850758524	1
-0.00808080808080808	-0.2505050505050505	1.0601948948603144e-13	3.0	0.11742859663135509	1
-0.00808080808080808	-0.2545454545454545	6.8492016740425785e-12	3.0	0.11725362475512494	1
-0.00808080808080808	-0.2585858585858586	3.744080202993414e-10	3.0	0.11707865287889477	1
-0.00808080808080808	-0.26262626262626265	1.138455977560461e-08	3.0	0.1169036810026646	1
-0.00808080808080808	-0.26666666666666666	6.57447655844587e-09	4.0	0.15234608531529503	1
-0.00808080808080808	-0.27070707070707073	2.0769014108210324e-10	4.0	0.1521711134390649	1
-0.00808080808080808	-0.27474747474747474	4.903434401552847e-12	4.0	0.15199614156283472	1
-0.00808080808080808	-0.2787878787878788	1.0152473122606072e-13	4.0	0.15182116968660456	1
-0.00808080808080808	-0.2828282828282828	2.5664727467946605e-15	4.0	0.1516461978103744	1
-0.00808080808080808	-0.2868686868686869	1.0175644181074595e-15	4.0	0.15147122593414425	1
-0.00808080808080808	-0.2909090909090909	2.434337018340985e-13	4.0	0.15129625405791408	1
-0.00808080808080808	-0.29494949494949496	1.447536363638725e-11	4.0	0.1511212821816839	1
-0.00808080808080808	-0.298989898989899	8.308501276736123e-10	4.0	0.15094631030545377	1
-0.00808080808080808	-0.30303030303030304	2.7059604245279984e-08	4.0	0.1507713384292236	1
-0.00808080808080808	-0.30707070707070705	1.5827306831603972e-08	5.0	0.18621374274185404	1
-0.00808080808080808	-0.3111111111111111	4.692088112774565e-10	5.0	0.18603877086562387	1
-0.00808080808080808	-0.3151515151515151	1.0594940187602682e-11	5.0	0.18586379898939373	1
-0.00808080808080808	-0.3191919191919192	2.4598976662173786e-13	5.0	0.1856888271131636	1
-0.00808080808080808	-0.3232323232323232	6.152854611368543e-15	5.0	0.18551385523693342	1
-0.00808080808080808	-0.32727272727272727	1.7218406509197517e-14	5.0	0.18533888336070325	1
-0.00808080808080808	-0.33131313131313134	9.229726996775769e-13	5.0	0.1851639114844731	1
-0.00808080808080808	-0.33535353535353535	5.4458223771988e-10	5.0	0.18498893960824292	1
-0.00808080808080808	-0.3393939393939394	2.3887108184824742e-08	5.0	0.18481396773201275	1
-0.00808080808080808	-0.3434343434343434	8.58695117668723e-08	6.0	0.2202563720446432	1
-0.00808080808080808	-0.3474747474747475	4.0001637814876875e-09	6.0	0.22008140016841304	1
-0.00808080808080808	-0.3515151515151515	9.409851664746388e-11	6.0	0.21990642829218288	1
-0.00808080808080808	-0.35555555555555557	3.47784013787292e-09	0.0	0.0	0
-0.00808080808080808	-0.3595959595959596	4.019444221743596e-09	0.0	0.0	0
-0.00808080808080808	-0.36363636363636365	4.68218504903825e-09	0.0	0.0	0
-0.00808080808080808	-0.36767676767676766	4.984564607590863e-09	0.0	0.0	0
-0.00808080808080808	-0.3717171717171717	5.148571220029002e-09	0.0	0.0	0
-0.00808080808080808	-0.37575757575757573	5.3107255367513366e-09	0.0	0.0	0
-0.00808080808080808	-0.3797979797979798	5.533229661521744e-09	0.0	0.0	0
-0.00808080808080808	-0.3838383838383838	6.243423533205988e-09	0.0	0.0	0
-0.00808080808080808	-0.3878787878787879	6.441679259750497e-09	0.0	0.0	0
-0.00808080808080808	-0.39191919191919194	6.528148753579768e-09	0.0	0.0	0
-0.00808080808080808	-0.39595959595959596	6.5321438540060396e-09	0.0	0.0	0
-0.00808080808080808	-0.4	6.5117676004132175e-09	0.0	0.0	0
-0.012121212121212121	-0.0	4.348606992993035e-18	0.0	0.0	0
-0.012121212121212121	-0.00404040404040404	5.819299023248152e-18	0.0	0.0	0
-0.012121212121212121	-0.00808080808080808	7.599931175642039e-18	0.0	0.0	0
-0.012121212121212121	-0.012121212121212121	1.080404480869663e-17	0.0	0.0	0
-0.012121212121212121	-0.01616161616161616	1.4642132364294034e-17	0.0	0.0	0
-0.012121212121212121	-0.0202020202020202	2.0003785679087127e-17	0.0	0.0	0
-0.012121212121212121	-0.024242424242424242	2.757819352204039e-17	0.0	0.0	0
-0.012121212121212121	-0.028282828282828285	3.845253431208184e-17	0.0	0.0	0
-0.012121212121212121	-0.03232323232323232	5.480030912962702e-17	0.0	0.0	0
-0.012121212121212121	-0.03636363636363636	7.475094701318829e-17	0.0	0.0	0
-0.012121212121212121	-0.0404040404040404	1.0404987840195676e-16	0.0	0.0	0
-0.012121212121212121	-0.044444444444444446	1.5984707979909604e-16	0.0	0.0	0
-0.012121212121212121	-0.048484848484848485	2.332031921232032e-16	0.0	0.0	0
-0.012121212121212121	-0.052525252525252523	3.477945697091153e-16	0.0	0.0	0
-0.012121212121212121	-0.05656565656565657	5.35357310273162e-16	0.0	0.0	0
-0.012121212121212121	-0.06060606060606061	8.759580800103502e-16	0.0	0.0	0
-0.012121212121212121	-0.06464646464646465	1.3014965029007553e-15	0.0	0.0	0
-0.012121212121212121	-0.06868686868686869	1.6011754226508708e-27	0.0	0.01842643818494521	1
-0.012121212121212121	-0.07272727272727272	2.2888576202053685e-25	0.0	0.018251466308715047	1
-0.012121212121212121	-0.07676767676767676	1.5822098116030841e-23	0.0	0.018076494432484887	1
-0.012121212121212121	-0.0808080808080808	4.188005215673917e-22	0.0	0.017901522556254726	1
-0.012121212121212121	-0.08484848484848485	2.2740913778153226e-20	0.0	0.017726550680024565	1
-0.012121212121212121	-0.08888888888888889	6.003490443121373e-19	0.0	0.017551578803794404	1
-0.012121212121212121	-0.09292929292929293	2.6358513736365237e-17	0.0	0.017376606927564243	1
-0.012121212121212121	-0.09696969696969697	7.519983642149729e-16	0.0	0.017201635051334083	1
-0.012121212121212121	-0.10101010101010101	2.6465101932373805e-14	0.0	0.017026663175103922	1
-0.012121212121212121	-0.10505050505050505	7.292364075867281e-13	0.0	0.01685169129887376	1
-0.012121212121212121	-0.10909090909090909	1.9590845484761266e-11	0.0	0.0166767194226436	1
-0.012121212121212121	-0.11313131313131314	4.0261674204242247e-10	0.0	0.01650174754641344	1
-0.012121212121212121	-0.11717171717171718	4.3501280774066776e-10	1.0	0.05194415185904389	1
-0.012121212121212121	-0.12121212121212122	3.3621086210833464e-11	1.0	0.05176917998281373	1
-0.012121212121212121	-0.12525252525252525	1.5997495475427318e-12	1.0	0.05159420810658357	1
-0.012121212121212121	-0.1292929292929293	5.0850634036852664e-14	1.0	0.05141923623035341	1
-0.012121212121212121	-0.13333333333333333	2.3128183698373837e-15	1.0	0.05124426435412325	1
-0.012121212121212121	-0.13737373737373737	1.0557493052234667e-16	1.0	0.05106929247789309	1
-0.012121212121212121	-0.1414141414141414	4.640846628794036e-18	1.0	0.05089432060166293	1
-0.012121212121212121	-0.14545454545454545	2.1653129377201765e-19	1.0	0.05071934872543277	1
-0.012121212121212121	-0.1494949494949495	3.205700216778645e-18	1.0	0.050544376849202606	1
-0.012121212121212121	-0.15353535353535352	1.5144694037193636e-16	1.0	0.050369404972972445	1
-0.012121212121212121	-0.15757575757575756	6.639076503067561e-15	1.0	0.050194433096742284	1
-0.012121212121212121	-0.1616161616161616	2.560574722579143e-13	1.0	0.050019461220512124	1
-0.012121212121212121	-0.16565656565656567	2.007264591113205e-11	1.0	0.04984448934428196	1
-0.012121212121212121	-0.1696969696969697	7.365551849155745e-10	1.0	0.0496695174680518	1
-0.012121212121212121	-0.17373737373737375	2.5030741556592023e-09	1.0	0.04949454559182164	1
-0.012121212121212121	-0.17777777777777778	1.7698718116540688e-10	2.0	0.08493694990445208	1
-0.012121212121212121	-0.18181818181818182	5.437309002683675e-12	2.0	0.08476197802822191	1
-0.012121212121212121	-0.18585858585858586	1.6982232134890508e-13	2.0	0.08458700615199176	1
-0.012121212121212121	-0.1898989898989899	2.90814564821165e-15	2.0	0.0844120342757616	1
-0.012121212121212121	-0.19393939393939394	8.602953082659204e-17	2.0	0.08423706239953144	1
-0.012121212121212121	-0.19797979797979798	1.5250625140617405e-17	2.0	0.08406209052330127	1
-0.012121212121212121	-0.20202020202020202	6.631544812161816e-16	2.0	0.08388711864707112	1
-0.012121212121212121	-0.20606060606060606	3.1950247012021854e-14	2.0	0.08371214677084095	1
-0.012121212121212121	-0.2101010101010101	1.4447714900134513e-12	2.0	0.0835371748946108	1
-0.012121212121212121	-0.21414141414141413	6.342081515396952e-11	2.0	0.08336220301838063	1
-0.012121212121212121	-0.21818181818181817	4.338516162184124e-09	2.0	0.08318723114215047	1
-0.012121212121212121	-0.2222222222222222	3.8062620671389915e-09	3.0	0.11862963545478092	1
-0.012121212121212121	-0.22626262626262628	1.3218326097687453e-10	3.0	0.11845466357855075	1
-0.012121212121212121	-0.23030303030303031	3.4878703750498897e-12	3.0	0.11827969170232058	1
-0.012121212121212121	-0.23434343434343435	9.358096230054042e-14	3.0	0.11810471982609042	1
-0.012121212121212121	-0.2383838383838384	2.4552065087042085e-15	3.0	0.11792974794986028	1
-0.012121212121212121	-0.24242424242424243	1.1151259937651075e-16	3.0	0.11775477607363011	1
-0.012121212121212121	-0.24646464646464647	2.2056586390955606e-15	3.0	0.11757980419739994	1
-0.012121212121212121	-0.2505050505050505	3.473522253905038e-13	3.0	0.1174048323211698	1
-0.012121212121212121	-0.2545454545454545	2.2649920940124402e-11	3.0	0.11722986044493963	1
-0.012121212121212121	-0.2585858585858586	1.2117837525295283e-09	3.0	0.11705488856870946	1
-0.012121212121212121	-0.26262626262626265	2.26138517496595e-08	3.0	0.1168799166924793	1
-0.012121212121212121	-0.26666666666666666	4.9244200712185135e-09	4.0	0.15232232100510973	1
-0.012121212121212121	-0.27070707070707073	1.2957382224510767e-10	4.0	0.1521473491288796	1
-0.012121212121212121	-0.27474747474747474	3.1355212794449106e-12	4.0	0.15197237725264942	1
-0.012121212121212121	-0.2787878787878788	7.774433562839899e-14	4.0	0.15179740537641925	1
-0.012121212121212121	-0.2828282828282828	2.042514256144159e-15	4.0	0.15162243350018909	1
-0.012121212121212121	-0.2868686868686869	1.180766824813514e-14	4.0	0.15144746162395895	1
-0.012121212121212121	-0.2909090909090909	8.759579206868608e-13	4.0	0.15127248974772878	1
-0.012121212121212121	-0.29494949494949496	5.2123755485060475e-11	4.0	0.1510975178714986	1
-0.012121212121212121	-0.298989898989899	2.944271419872322e-09	4.0	0.15092254599526847	1
-0.012121212121212121	-0.30303030303030304	5.778162298635041e-08	4.0	0.1507475741190383	1
-0.012121212121212121	-0.30707070707070705	1.2111733326746259e-08	5.0	0.18618997843166873	1
-0.012121212121212121	-0.3111111111111111	2.9391823913123497e-10	5.0	0.18601500655543857	1
-0.012121212121212121	-0.3151515151515151	6.7610837173062855e-12	5.0	0.18584003467920843	1
-0.012121212121212121	-0.3191919191919192	1.5919469003959403e-13	5.0	0.1856650628029783	1
-0.012121212121212121	-0.3232323232323232	5.0232697715160385e-15	5.0	0.18549009092674812	1
-0.012121212121212121	-0.32727272727272727	6.605742141375781e-14	5.0	0.18531511905051795	1
-0.012121212121212121	-0.33131313131313134	1.5598531751879833e-11	5.0	0.18514014717428778	1
-0.012121212121212121	-0.33535353535353535	2.3409467669967232e-09	5.0	0.18496517529805762	1
-0.012121212121212121	-0.3393939393939394	9.853631646820117e-08	5.0	0.18479020342182745	1
-0.012121212121212121	-0.3434343434343434	1.0448445514926476e-07	6.0	0.2202326077344579	1
-0.012121212121212121	-0.3474747474747475	3.4781543603974156e-09	6.0	0.22005763585822774	1
-0.012121212121212121	-0.3515151515151515	6.734587308172905e-11	6.0	0.21988266398199757	1
-0.012121212121212121	-0.35555555555555557	5.770636335909841e-09	0.0	0.0	0
-0.012121212121212121	-0.3595959595959596	5.757956991011472e-09	0.0	0.0	0
-0.012121212121212121	-0.36363636363636365	5.8694028627607405e-09	0.0	0.0	0
-0.012121212121212121	-0.36767676767676766	5.791559538066941e-09	0.0	0.0	0
-0.012121212121212121	-0.3717171717171717	5.915762490512199e-09	0.0	0.0	0
-0.012121212121212121	-0.37575757575757573	5.829117003296463e-09	0.0	0.0	0
-0.012121212121212121	-0.3797979797979798	6.624354528354504e-09	0.0	0.0	0
-0.012121212121212121	-0.3838383838383838	6.504983524197717e-09	0.0	0.0	0
-0.012121212121212121	-0.3878787878787879	6.470065788711905e-09	0.0	0.0	0
-0.012121212121212121	-0.39191919191919194	6.4897363883283964e-09	0.0	0.0	0
-0.012121212121212121	-0.39595959595959596	6.4153835716854965e-09	0.0	0.0	0
-0.012121212121212121	-0.4	6.506950013763169e-09	0.0	0.0	0
-0.01616161616161616	-0.0	5.818196361413611e-18	0.0	0.0	0
-0.01616161616161616	-0.00404040404040404	7.734241584858802e-18	0.0	0.0	0
-0.01616161616161616	-0.00808080808080808	1.0141604999818296e-17	0.0	0.0	0
-0.01616161616161616	-0.012121212121212121	1.4489327123457566e-17	0.0	0.0	0
-0.01616161616161616	-0.01616161616161616	1.9686195296437593e-17	0.0	0.0	0
-0.01616161616161616	-0.0202020202020202	2.6966832447957137e-17	0.0	0.0	0
-0.01616161616161616	-0.024242424242424242	3.728668034743483e-17	0.0	0.0	0
-0.01616161616161616	-0.028282828282828285	5.2170696568239804e-17	0.0	0.0	0
-0.01616161616161616	-0.03232323232323232	7.459293543557524e-17	0.0	0.0	0
-0.01616161616161616	-0.03636363636363636	1.0151993447965458e-16	0.0	0.0	0
-0.01616161616161616	-0.0404040404040404	1.419181044523087e-16	0.0	0.0	0
-0.01616161616161616	-0.044444444444444446	2.1920547339209047e-16	0.0	0.0	0
-0.01616161616161616	-0.048484848484848485	3.2129555634633547e-16	0.0	0.0	0
-0.01616161616161616	-0.052525252525252523	4.819301840461133e-16	0.0	0.0	0
-0.01616161616161616	-0.05656565656565657	7.478400236397631e-16	0.0	0.0	0
-0.01616161616161616	-0.06060606060606061	1.2476525893199035e-15	0.0	0.0	0
-0.01616161616161616	-0.06464646464646465	1.800942736154698e-15	0.0	0.0	0
-0.01616161616161616	-0.06868686868686869	2.8978829300615932e-27	0.0	0.01840267387475992	1
-0.01616161616161616	-0.07272727272727272	4.741626221730555e-25	0.0	0.018227701998529758	1
-0.01616161616161616	-0.07676767676767676	3.5497385887653843e-23	0.0	0.018052730122299597	1
-0.01616161616161616	-0.0808080808080808	8.746200522552358e-22	0.0	0.017877758246069436	1
-0.01616161616161616	-0.08484848484848485	5.186621773274452e-20	0.0	0.017702786369839275	1
-0.01616161616161616	-0.08888888888888889	2.275610041998562e-18	0.0	0.017527814493609115	1
-0.01616161616161616	-0.09292929292929293	6.047278307235217e-17	0.0	0.017352842617378954	1
-0.01616161616161616	-0.09696969696969697	1.6299826997369374e-15	0.0	0.017177870741148793	1
-0.01616161616161616	-0.10101010101010101	6.132663424826379e-14	0.0	0.017002898864918632	1
-0.01616161616161616	-0.10505050505050505	1.6816222725888089e-12	0.0	0.01682792698868847	1
-0.01616161616161616	-0.10909090909090909	4.267816909980283e-11	0.0	0.01665295511245831	1
-0.01616161616161616	-0.11313131313131314	7.018280501923295e-10	0.0	0.01647798323622815	1
-0.01616161616161616	-0.11717171717171718	4.108688763927348e-10	1.0	0.051920387548858596	1
-0.01616161616161616	-0.12121212121212122	2.6631373111726523e-11	1.0	0.051745415672628435	1
-0.01616161616161616	-0.12525252525252525	9.10566270530016e-13	1.0	0.051570443796398274	1
-0.01616161616161616	-0.1292929292929293	3.920116132151604e-14	1.0	0.05139547192016811	1
-0.01616161616161616	-0.13333333333333333	1.795347732180067e-15	1.0	0.05122050004393795	1
-0.01616161616161616	-0.13737373737373737	8.275223026308609e-17	1.0	0.05104552816770779	1
-0.01616161616161616	-0.1414141414141414	2.911382192356728e-18	1.0	0.05087055629147763	1
-0.01616161616161616	-0.14545454545454545	3.197896266542538e-19	1.0	0.05069558441524747	1
-0.01616161616161616	-0.1494949494949495	8.770873006497646e-18	1.0	0.05052061253901731	1
-0.01616161616161616	-0.15353535353535352	4.128694544321001e-16	1.0	0.05034564066278715	1
-0.01616161616161616	-0.15757575757575756	1.7210726035666215e-14	1.0	0.05017066878655699	1
-0.01616161616161616	-0.1616161616161616	1.3327928042824528e-12	1.0	0.04999569691032683	1
-0.01616161616161616	-0.16565656565656567	5.485993833649647e-11	1.0	0.049820725034096666	1
-0.01616161616161616	-0.1696969696969697	1.713470990613959e-09	1.0	0.049645753157866505	1
-0.01616161616161616	-0.17373737373737375	2.475825991784806e-09	2.0	0.08508815747049694	1
-0.01616161616161616	-0.17777777777777778	1.218990445786803e-10	2.0	0.08491318559426679	1
-0.01616161616161616	-0.18181818181818182	3.726223168308051e-12	2.0	0.08473821371803662	1
-0.01616161616161616	-0.18585858585858586	6.995243609216361e-14	2.0	0.08456324184180647	1
-0.01616161616161616	-0.1898989898989899	1.9782409739064216e-15	2.0	0.08438826996557632	1
-0.01616161616161616	-0.19393939393939394	5.96808511808581e-17	2.0	0.08421329808934615	1
-0.01616161616161616	-0.19797979797979798	4.0190529550370715e-17	2.0	0.08403832621311598	1
-0.01616161616161616	-0.20202020202020202	2.001638567122365e-15	2.0	0.08386335433688583	1
-0.01616161616161616	-0.20606060606060606	9.239985581065797e-14	2.0	0.08368838246065566	1
-0.01616161616161616	-0.2101010101010101	4.179545725149802e-12	2.0	0.0835134105844255	1
-0.01616161616161616	-0.21414141414141413	4.5862439875296125e-10	2.0	0.08333843870819534	1
-0.01616161616161616	-0.21818181818181817	1.0283881096975455e-08	2.0	0.08316346683196518	1
-0.01616161616161616	-0.2222222222222222	3.358363252787163e-09	3.0	0.11860587114459564	1
-0.01616161616161616	-0.22626262626262628	8.750401630310939e-11	3.0	0.11843089926836547	1
-0.01616161616161616	-0.23030303030303031	2.3619159668070933e-12	3.0	0.11825592739213531	1
-0.01616161616161616	-0.23434343434343435	6.101073297350402e-14	3.0	0.11808095551590514	1
-0.01616161616161616	-0.2383838383838384	1.6362487260987138e-15	3.0	0.11790598363967499	1
-0.01616161616161616	-0.24242424242424243	1.855834002718485e-16	3.0	0.11773101176344483	1
-0.01616161616161616	-0.24646464646464647	2.1995698296219434e-14	3.0	0.11755603988721466	1
-0.01616161616161616	-0.2505050505050505	1.3528806971822922e-12	3.0	0.11738106801098451	1
-0.01616161616161616	-0.2545454545454545	7.671818167725586e-11	3.0	0.11720609613475436	1
-0.01616161616161616	-0.2585858585858586	3.934026117504527e-09	3.0	0.11703112425852419	1
-0.01616161616161616	-0.26262626262626265	3.611933781840138e-08	3.0	0.11685615238229402	1
-0.01616161616161616	-0.26666666666666666	3.377913759368245e-09	4.0	0.15229855669492445	1
-0.01616161616161616	-0.27070707070707073	8.45716292817721e-11	4.0	0.1521235848186943	1
-0.01616161616161616	-0.27474747474747474	2.081783910836292e-12	4.0	0.15194861294246415	1
-0.01616161616161616	-0.2787878787878788	5.245040338750294e-14	4.0	0.15177364106623398	1
-0.01616161616161616	-0.2828282828282828	1.4892091991856192e-15	4.0	0.1515986691900038	1
-0.01616161616161616	-0.2868686868686869	5.12075453809381e-14	4.0	0.15142369731377367	1
-0.01616161616161616	-0.2909090909090909	3.8589254939994075e-12	4.0	0.1512487254375435	1
-0.01616161616161616	-0.29494949494949496	1.9687681767460036e-10	4.0	0.15107375356131333	1
-0.01616161616161616	-0.298989898989899	1.0736154483728307e-08	4.0	0.1508987816850832	1
-0.01616161616161616	-0.30303030303030304	9.848667920623487e-08	4.0	0.15072380980885303	1
-0.01616161616161616	-0.30707070707070705	8.127091045091122e-09	5.0	0.1861662141214835	1
-0.01616161616161616	-0.3111111111111111	1.9393469808577846e-10	5.0	0.18599124224525332	1
-0.01616161616161616	-0.3151515151515151	4.5693477018941475e-12	5.0	0.18581627036902315	1
-0.01616161616161616	-0.3191919191919192	1.1086883453815106e-13	5.0	0.18564129849279298	1
-0.01616161616161616	-0.3232323232323232	7.8847407381991e-15	5.0	0.18546632661656282	1
-0.01616161616161616	-0.32727272727272727	1.2683303902858091e-12	5.0	0.18529135474033265	1
-0.01616161616161616	-0.33131313131313134	7.648974480709179e-11	5.0	0.18511638286410248	1
-0.01616161616161616	-0.33535353535353535	1.0595100844624636e-08	5.0	0.18494141098787237	1
-0.01616161616161616	-0.3393939393939394	2.6008819996096706e-07	5.0	0.1847664391116422	1
-0.01616161616161616	-0.3434343434343434	6.923031888655351e-08	6.0	0.2202088434242726	1
-0.01616161616161616	-0.3474747474747475	1.6842304489850105e-09	6.0	0.22003387154804244	1
-0.01616161616161616	-0.3515151515151515	3.382708642930984e-11	6.0	0.21985889967181232	1
-0.01616161616161616	-0.35555555555555557	6.841353724516364e-09	0.0	0.0	0
-0.01616161616161616	-0.3595959595959596	5.7348947240718435e-09	0.0	0.0	0
-0.01616161616161616	-0.36363636363636365	5.893815491867329e-09	0.0	0.0	0
-0.01616161616161616	-0.36767676767676766	5.6113974146097275e-09	0.0	0.0	0
-0.01616161616161616	-0.3717171717171717	5.495455397166764e-09	0.0	0.0	0
-0.01616161616161616	-0.37575757575757573	6.2351961359060324e-09	0.0	0.0	0
-0.01616161616161616	-0.3797979797979798	6.161518524137681e-09	0.0	0.0	0
-0.01616161616161616	-0.3838383838383838	6.281984837083919e-09	0.0	0.0	0
-0.01616161616161616	-0.3878787878787879	6.063382258422447e-09	0.0	0.0	0
-0.01616161616161616	-0.39191919191919194	6.0390213243556645e-09	0.0	0.0	0
-0.01616161616161616	-0.39595959595959596	6.057689051681936e-09	0.0	0.0	0
-0.01616161616161616	-0.4	5.9514960645590976e-09	0.0	0.0	0
-0.0202020202020202	-0.0	7.837185415754871e-18	0.0	0.0	0
-0.0202020202020202	-0.00404040404040404	1.0348168367494109e-17	0.0	0.0	0
-0.0202020202020202	-0.00808080808080808	1.3620466002169838e-17	0.0	0.0	0
-0.0202020202020202	-0.012121212121212121	1.95604338802117e-17	0.0	0.0	0
-0.0202020202020202	-0.01616161616161616	2.664811524068092e-17	0.0	0.0	0
-0.0202020202020202	-0.0202020202020202	3.6608813751005806e-17	0.0	0.0	0
-0.0202020202020202	-0.024242424242424242	5.077950351277084e-17	0.0	0.0	0
-0.0202020202020202	-0.028282828282828285	7.132443701180608e-17	0.0	0.0	0
-0.0202020202020202	-0.03232323232323232	1.0122390269147953e-16	0.0	0.0	0
-0.0202020202020202	-0.03636363636363636	1.3901569704602652e-16	0.0	0.0	0
-0.0202020202020202	-0.0404040404040404	2.0965005788983648e-16	0.0	0.0	0
-0.0202020202020202	-0.044444444444444446	3.032293082632815e-16	0.0	0.0	0
-0.0202020202020202	-0.048484848484848485	4.468193014795235e-16	0.0	0.0	0
-0.0202020202020202	-0.052525252525252523	6.74752614934071e-16	0.0	0.0	0
-0.0202020202020202	-0.05656565656565657	1.0578100109428386e-15	0.0	0.0	0
-0.0202020202020202	-0.06060606060606061	1.8178445944946683e-15	0.0	0.0	0
-0.0202020202020202	-0.06464646464646465	5.230357326975144e-28	0.0	0.01855388144080479	1
-0.0202020202020202	-0.06868686868686869	4.188858056217256e-26	0.0	0.01837890956457463	1
-0.0202020202020202	-0.07272727272727272	9.700804155771312e-25	0.0	0.018203937688344468	1
-0.0202020202020202	-0.07676767676767676	7.941831962342845e-23	0.0	0.018028965812114307	1
-0.0202020202020202	-0.0808080808080808	4.4107970501933556e-21	0.0	0.017853993935884147	1
-0.0202020202020202	-0.08484848484848485	1.1691123001643026e-19	0.0	0.017679022059653986	1
-0.0202020202020202	-0.08888888888888889	4.885121107925674e-18	0.0	0.017504050183423825	1
-0.0202020202020202	-0.09292929292929293	1.3864818543377003e-16	0.0	0.017329078307193664	1
-0.0202020202020202	-0.09696969696969697	3.567933047766102e-15	0.0	0.017154106430963503	1
-0.0202020202020202	-0.10101010101010101	1.422019369993729e-13	0.0	0.016979134554733342	1
-0.0202020202020202	-0.10505050505050505	3.918559972468267e-12	0.0	0.01680416267850318	1
-0.0202020202020202	-0.10909090909090909	1.3345205335471589e-10	0.0	0.01662919080227302	1
-0.0202020202020202	-0.11313131313131314	1.1151862006504812e-09	0.0	0.01645421892604286	1
-0.0202020202020202	-0.11717171717171718	3.6967585945533824e-10	1.0	0.051896623238673306	1
-0.0202020202020202	-0.12121212121212122	2.0783568725326128e-11	1.0	0.051721651362443145	1
-0.0202020202020202	-0.12525252525252525	6.620601542170507e-13	1.0	0.051546679486212985	1
-0.0202020202020202	-0.1292929292929293	3.063157289873057e-14	1.0	0.051371707609982824	1
-0.0202020202020202	-0.13333333333333333	1.4177988489928194e-15	1.0	0.05119673573375266	1
-0.0202020202020202	-0.13737373737373737	6.38033534789794e-17	1.0	0.0510217638575225	1
-0.0202020202020202	-0.1414141414141414	2.2529900078240817e-18	1.0	0.05084679198129234	1
-0.0202020202020202	-0.14545454545454545	6.515135113482514e-19	1.0	0.05067182010506218	1
-0.0202020202020202	-0.1494949494949495	2.6789324557467797e-17	1.0	0.05049684822883202	1
-0.0202020202020202	-0.15353535353535352	1.2618598969570211e-15	1.0	0.05032187635260186	1
-0.0202020202020202	-0.15757575757575756	4.990041240809991e-14	1.0	0.0501469044763717	1
-0.0202020202020202	-0.1616161616161616	3.712415517385226e-12	1.0	0.04997193260014154	1
-0.0202020202020202	-0.16565656565656567	1.514580036538577e-10	1.0	0.049796960723911377	1
-0.0202020202020202	-0.1696969696969697	3.6002111040455678e-09	1.0	0.049621988847681216	1
-0.0202020202020202	-0.17373737373737375	2.1936423444944747e-09	2.0	0.08506439316031165	1
-0.0202020202020202	-0.17777777777777778	8.405291616071956e-11	2.0	0.0848894212840815	1
-0.0202020202020202	-0.18181818181818182	2.6075250166288775e-12	2.0	0.08471444940785133	1
-0.0202020202020202	-0.18585858585858586	4.8311102279069404e-14	2.0	0.08453947753162118	1
-0.0202020202020202	-0.1898989898989899	1.3716809939697104e-15	2.0	0.08436450565539103	1
-0.0202020202020202	-0.19393939393939394	4.359601811755711e-17	2.0	0.08418953377916086	1
-0.0202020202020202	-0.19797979797979798	1.2012675783685012e-16	2.0	0.08401456190293069	1
-0.0202020202020202	-0.20202020202020202	5.866948766310558e-15	2.0	0.08383959002670054	1
-0.0202020202020202	-0.20606060606060606	2.7297556788040723e-13	2.0	0.08366461815047037	1
-0.0202020202020202	-0.2101010101010101	1.2340040025568444e-11	2.0	0.08348964627424021	1
-0.0202020202020202	-0.21414141414141413	1.3905965532168335e-09	2.0	0.08331467439801005	1
-0.0202020202020202	-0.21818181818181817	1.7508200028505972e-08	2.0	0.08313970252177989	1
-0.0202020202020202	-0.2222222222222222	2.4406703674772106e-09	3.0	0.11858210683441034	1
-0.0202020202020202	-0.22626262626262628	6.90370889274929e-11	3.0	0.11840713495818017	1
-0.0202020202020202	-0.23030303030303031	1.8148023859208372e-12	3.0	0.11823216308195	1
-0.0202020202020202	-0.23434343434343435	4.7306859491834434e-14	3.0	0.11805719120571984	1
-0.0202020202020202	-0.2383838383838384	1.1297644201412795e-15	3.0	0.1178822193294897	1
-0.0202020202020202	-0.24242424242424243	1.4191281255007768e-15	3.0	0.11770724745325953	1
-0.0202020202020202	-0.24646464646464647	7.615037674825217e-14	3.0	0.11753227557702936	1
-0.0202020202020202	-0.2505050505050505	4.7455657886512395e-12	3.0	0.11735730370079922	1
-0.0202020202020202	-0.2545454545454545	2.6887436814745835e-10	3.0	0.11718233182456905	1
-0.0202020202020202	-0.2585858585858586	1.2645335795058887e-08	3.0	0.11700735994833888	1
-0.0202020202020202	-0.26262626262626265	4.610742804535898e-08	4.0	0.15244976426096932	1
-0.0202020202020202	-0.26666666666666666	2.327633925084533e-09	4.0	0.15227479238473915	1
-0.0202020202020202	-0.27070707070707073	5.80143351947242e-11	4.0	0.152099820508509	1
-0.0202020202020202	-0.27474747474747474	1.453283991459098e-12	4.0	0.15192484863227884	1
-0.0202020202020202	-0.2787878787878788	3.7264512404843744e-14	4.0	0.15174987675604867	1
-0.0202020202020202	-0.2828282828282828	3.975929824617623e-15	4.0	0.1515749048798185	1
-0.0202020202020202	-0.2868686868686869	2.060544783124106e-13	4.0	0.15139993300358837	1
-0.0202020202020202	-0.2909090909090909	1.5734729372446475e-11	4.0	0.1512249611273582	1
-0.0202020202020202	-0.29494949494949496	9.460039315514548e-10	4.0	0.15104998925112803	1
-0.0202020202020202	-0.298989898989899	4.720927460637895e-08	4.0	0.1508750173748979	1
-0.0202020202020202	-0.30303030303030304	1.5091541696308474e-07	5.0	0.18631742168752835	1
-0.0202020202020202	-0.30707070707070705	6.005942322845415e-09	5.0	0.18614244981129818	1
-0.0202020202020202	-0.3111111111111111	1.4542644327993294e-10	5.0	0.18596747793506802	1
-0.0202020202020202	-0.3151515151515151	3.2749796511435195e-12	5.0	0.18579250605883785	1
-0.0202020202020202	-0.3191919191919192	7.243557371645434e-14	5.0	0.18561753418260768	1
-0.0202020202020202	-0.3232323232323232	7.607063565446666e-14	5.0	0.1854425623063775	1
-0.0202020202020202	-0.32727272727272727	4.193990936069534e-12	5.0	0.18526759043014734	1
-0.0202020202020202	-0.33131313131313134	2.2325884259588285e-10	5.0	0.18509261855391718	1
-0.0202020202020202	-0.33535353535353535	2.899750893926272e-08	5.0	0.18491764667768706	1
-0.0202020202020202	-0.3393939393939394	3.133850523772182e-07	5.0	0.1847426748014569	1
-0.0202020202020202	-0.3434343434343434	2.9569819281427952e-08	6.0	0.2201850791140873	1
-0.0202020202020202	-0.3474747474747475	6.34876182205811e-10	6.0	0.22001010723785713	1
-0.0202020202020202	-0.3515151515151515	1.2332768684272846e-11	6.0	0.21983513536162702	1
-0.0202020202020202	-0.35555555555555557	6.5223072430267135e-09	0.0	0.0	0
-0.0202020202020202	-0.3595959595959596	6.376731925556776e-09	0.0	0.0	0
-0.0202020202020202	-0.36363636363636365	6.399120363065381e-09	0.0	0.0	0
-0.0202020202020202	-0.36767676767676766	5.394089031514699e-09	0.0	0.0	0
-0.0202020202020202	-0.3717171717171717	6.064903685119964e-09	0.0	0.0	0
-0.0202020202020202	-0.37575757575757573	6.022495148112873e-09	0.0	0.0	0
-0.0202020202020202	-0.3797979797979798	5.877160001769788e-09	0.0	0.0	0
-0.0202020202020202	-0.3838383838383838	5.762854421013291e-09	0.0	0.0	0
-0.0202020202020202	-0.3878787878787879	5.776426482157096e-09	0.0	0.0	0
-0.0202020202020202	-0.39191919191919194	5.623547990843776e-09	0.0	0.0	0
-0.0202020202020202	-0.39595959595959596	5.529609415547089e-09	0.0	0.0	0
-0.0202020202020202	-0.4	5.584671682473556e-09	0.0	0.0	0
-0.024242424242424242	-0.0	1.064315708356203e-17	0.0	0.0	0
-0.024242424242424242	-0.00404040404040404	1.3948891550147843e-17	0.0	0.0	0
-0.024242424242424242	-0.00808080808080808	1.8428744774216342e-17	0.0	0.0	0
-0.024242424242424242	-0.012121212121212121	2.6615089184152747e-17	0.0	0.0	0
-0.024242424242424242	-0.01616161616161616	3.637121360752899e-17	0.0	0.0	0
-0.024242424242424242	-0.0202020202020202	5.0135267516860825e-17	0.0	0.0	0
-0.024242424242424242	-0.024242424242424242	6.98108930383115e-17	0.0	0.0	0
-0.024242424242424242	-0.028282828282828285	9.854835607061579e-17	0.0	0.0	0
-0.024242424242424242	-0.03232323232323232	1.3945157541731828e-16	0.0	0.0	0
-0.024242424242424242	-0.03636363636363636	1.922884549915146e-16	0.0	0.0	0
-0.024242424242424242	-0.0404040404040404	2.9047113878454782e-16	0.0	0.0	0
-0.024242424242424242	-0.044444444444444446	4.207916151872384e-16	0.0	0.0	0
-0.024242424242424242	-0.048484848484848485	6.215325071653578e-16	0.0	0.0	0
-0.024242424242424242	-0.052525252525252523	9.419003503198578e-16	0.0	0.0	0
-0.024242424242424242	-0.05656565656565657	1.4854016765678273e-15	0.0	0.0	0
-0.024242424242424242	-0.06060606060606061	2.562670489515141e-15	0.0	0.0	0
-0.024242424242424242	-0.06464646464646465	9.159043982624613e-28	0.0	0.018530117130619497	1
-0.024242424242424242	-0.06868686868686869	8.675776940539886e-26	0.0	0.018355145254389336	1
-0.024242424242424242	-0.07272727272727272	1.9610369187708262e-24	0.0	0.018180173378159175	1
-0.024242424242424242	-0.07676767676767676	1.7593318125758707e-22	0.0	0.018005201501929014	1
-0.024242424242424242	-0.0808080808080808	9.293787142347315e-21	0.0	0.017830229625698853	1
-0.024242424242424242	-0.08484848484848485	2.598794429464764e-19	0.0	0.017655257749468693	1
-0.024242424242424242	-0.08888888888888889	1.1493225098994668e-17	0.0	0.017480285873238532	1
-0.024242424242424242	-0.09292929292929293	3.2293721650924714e-16	0.0	0.01730531399700837	1
-0.024242424242424242	-0.09696969696969697	1.2787280947376454e-14	0.0	0.01713034212077821	1
-0.024242424242424242	-0.10101010101010101	3.3295770617278586e-13	0.0	0.01695537024454805	1
-0.024242424242424242	-0.10505050505050505	9.176524310427802e-12	0.0	0.01678039836831789	1
-0.024242424242424242	-0.10909090909090909	3.043449868626044e-10	0.0	0.016605426492087728	1
-0.024242424242424242	-0.11313131313131314	1.599854449993032e-09	0.0	0.016430454615857567	1
-0.024242424242424242	-0.11717171717171718	3.245267750794019e-10	1.0	0.051872858928488016	1
-0.024242424242424242	-0.12121212121212122	1.6546225944535013e-11	1.0	0.051697887052257856	1
-0.024242424242424242	-0.12525252525252525	5.20267858758439e-13	1.0	0.051522915176027695	1
-0.024242424242424242	-0.1292929292929293	2.4282473869190373e-14	1.0	0.051347943299797534	1
-0.024242424242424242	-0.13333333333333333	1.1606776734131256e-15	1.0	0.05117297142356737	1
-0.024242424242424242	-0.13737373737373737	5.0188438503098566e-17	1.0	0.05099799954733721	1
-0.024242424242424242	-0.1414141414141414	1.789333777441427e-18	1.0	0.05082302767110705	1
-0.024242424242424242	-0.14545454545454545	1.662108732288099e-18	1.0	0.05064805579487689	1
-0.024242424242424242	-0.1494949494949495	7.654408300051892e-17	1.0	0.05047308391864673	1
-0.024242424242424242	-0.15353535353535352	3.386215703347021e-15	1.0	0.05029811204241657	1
-0.024242424242424242	-0.15757575757575756	1.346546546564167e-13	1.0	0.05012314016618641	1
-0.024242424242424242	-0.1616161616161616	1.1444111061739227e-11	1.0	0.04994816828995625	1
-0.024242424242424242	-0.16565656565656567	4.5808507666581545e-10	1.0	0.04977319641372609	1
-0.024242424242424242	-0.1696969696969697	6.5901223618696356e-09	1.0	0.049598224537495926	1
-0.024242424242424242	-0.17373737373737375	1.7448155188430244e-09	2.0	0.08504062885012637	1
-0.024242424242424242	-0.17777777777777778	5.932513853810506e-11	2.0	0.08486565697389621	1
-0.024242424242424242	-0.18181818181818182	1.1076886436159734e-12	2.0	0.08469068509766604	1
-0.024242424242424242	-0.18585858585858586	3.4121259089793984e-14	2.0	0.08451571322143589	1
-0.024242424242424242	-0.1898989898989899	9.735641340784728e-16	2.0	0.08434074134520574	1
-0.024242424242424242	-0.19393939393939394	3.6785308815764094e-17	2.0	0.08416576946897557	1
-0.024242424242424242	-0.19797979797979798	3.725721611841552e-16	2.0	0.0839907975927454	1
-0.024242424242424242	-0.20202020202020202	1.7756703729423213e-14	2.0	0.08381582571651525	1
-0.024242424242424242	-0.20606060606060606	8.270653654446132e-13	2.0	0.08364085384028508	1
-0.024242424242424242	-0.2101010101010101	9.608852765044024e-11	2.0	0.08346588196405492	1
-0.024242424242424242	-0.21414141414141413	4.19040992253351e-09	2.0	0.08329091008782476	1
-0.024242424242424242	-0.21818181818181817	2.418209711104956e-08	2.0	0.0831159382115946	1
-0.024242424242424242	-0.2222222222222222	1.7583558003173909e-09	3.0	0.11855834252422506	1
-0.024242424242424242	-0.22626262626262628	4.905160817111355e-11	3.0	0.1183833706479949	1
-0.024242424242424242	-0.23030303030303031	1.2416865975630843e-12	3.0	0.11820839877176473	1
-0.024242424242424242	-0.23434343434343435	3.311412828757665e-14	3.0	0.11803342689553456	1
-0.024242424242424242	-0.2383838383838384	9.453895616430922e-16	3.0	0.1178584550193044	1
-0.024242424242424242	-0.24242424242424243	5.724389315677765e-15	3.0	0.11768348314307425	1
-0.024242424242424242	-0.24646464646464647	2.775348130364956e-13	3.0	0.11750851126684408	1
-0.024242424242424242	-0.2505050505050505	1.7699864436299516e-11	3.0	0.11733353939061393	1
-0.024242424242424242	-0.2545454545454545	9.97095516161092e-10	3.0	0.11715856751438378	1
-0.024242424242424242	-0.2585858585858586	3.921386759964049e-08	3.0	0.11698359563815361	1
-0.024242424242424242	-0.26262626262626265	4.601625798038266e-08	4.0	0.15242599995078404	1
-0.024242424242424242	-0.26666666666666666	1.634182690437056e-09	4.0	0.15225102807455387	1
-0.024242424242424242	-0.27070707070707073	4.077739194419101e-11	4.0	0.15207605619832373	1
-0.024242424242424242	-0.27474747474747474	1.0376076415773418e-12	4.0	0.15190108432209357	1
-0.024242424242424242	-0.2787878787878788	1.1767465783746187e-14	4.0	0.1517261124458634	1
-0.024242424242424242	-0.2828282828282828	1.5623950578768307e-14	4.0	0.15155114056963323	1
-0.024242424242424242	-0.2868686868686869	9.241403047723678e-13	4.0	0.1513761686934031	1
-0.024242424242424242	-0.2909090909090909	6.880849696828755e-11	4.0	0.15120119681717292	1
-0.024242424242424242	-0.29494949494949496	3.870996593191727e-09	4.0	0.15102622494094275	1
-0.024242424242424242	-0.298989898989899	1.441857843579605e-07	4.0	0.15085125306471261	1
-0.024242424242424242	-0.30303030303030304	1.2045336298724323e-07	5.0	0.18629365737734305	1
-0.024242424242424242	-0.30707070707070705	3.5254213622307778e-09	5.0	0.18611868550111288	1
-0.024242424242424242	-0.3111111111111111	7.455843961248031e-11	5.0	0.1859437136248827	1
-0.024242424242424242	-0.3151515151515151	1.4091872744779792e-12	5.0	0.18576874174865257	1
-0.024242424242424242	-0.3191919191919192	1.5293851355730613e-14	5.0	0.18559376987242243	1
-0.024242424242424242	-0.3232323232323232	2.0440333817724241e-13	5.0	0.18541879799619226	1
-0.024242424242424242	-0.32727272727272727	1.0988093622195046e-11	5.0	0.1852438261199621	1
-0.024242424242424242	-0.33131313131313134	5.810828151709763e-10	5.0	0.18506885424373193	1
-0.024242424242424242	-0.33535353535353535	7.053594344813363e-08	5.0	0.18489388236750176	1
-0.024242424242424242	-0.3393939393939394	2.635254493387604e-07	5.0	0.1847189104912716	1
-0.024242424242424242	-0.3434343434343434	1.1907584879646045e-08	6.0	0.22016131480390205	1
-0.024242424242424242	-0.3474747474747475	2.334214573032826e-10	6.0	0.21998634292767189	1
-0.024242424242424242	-0.3515151515151515	6.176292035982588e-09	0.0	0.0	0
-0.024242424242424242	-0.35555555555555557	6.1245910346361e-09	0.0	0.0	0
-0.024242424242424242	-0.3595959595959596	6.063559680994775e-09	0.0	0.0	0
-0.024242424242424242	-0.36363636363636365	5.91810203710365e-09	0.0	0.0	0
-0.024242424242424242	-0.36767676767676766	5.886819279128737e-09	0.0	0.0	0
-0.024242424242424242	-0.3717171717171717	6.839313966337169e-09	0.0	0.0	0
-0.024242424242424242	-0.37575757575757573	6.8149028702293965e-09	0.0	0.0	0
-0.024242424242424242	-0.3797979797979798	5.560408773040123e-09	0.0	0.0	0
-0.024242424242424242	-0.3838383838383838	5.6344381028313665e-09	0.0	0.0	0
-0.024242424242424242	-0.3878787878787879	5.421815175699986e-09	0.0	0.0	0
-0.024242424242424242	-0.39191919191919194	5.310458629637813e-09	0.0	0.0	0
-0.024242424242424242	-0.39595959595959596	5.354999428321643e-09	0.0	0.0	0
-0.024242424242424242	-0.4	5.0493208854250346e-09	0.0	0.0	0
-0.028282828282828285	-0.0	1.4634150085463297e-17	0.0	0.0	0
-0.028282828282828285	-0.00404040404040404	1.8987974245758153e-17	0.0	0.0	0
-0.028282828282828285	-0.00808080808080808	2.6959520795462184e-17	0.0	0.0	0
-0.028282828282828285	-0.012121212121212121	3.6565827653369186e-17	0.0	0.0	0
-0.028282828282828285	-0.01616161616161616	4.990891358518291e-17	0.0	0.0	0
-0.028282828282828285	-0.0202020202020202	6.876822440296707e-17	0.0	0.0	0
-0.028282828282828285	-0.024242424242424242	9.576032665520185e-17	0.0	0.0	0
-0.028282828282828285	-0.028282828282828285	1.352929504665712e-16	0.0	0.0	0
-0.028282828282828285	-0.03232323232323232	1.898121846481322e-16	0.0	0.0	0
-0.028282828282828285	-0.03636363636363636	2.6316136946398225e-16	0.0	0.0	0
-0.028282828282828285	-0.0404040404040404	4.01607265836775e-16	0.0	0.0	0
-0.028282828282828285	-0.044444444444444446	5.849114763174415e-16	0.0	0.0	0
-0.028282828282828285	-0.048484848484848485	8.690532049210734e-16	0.0	0.0	0
-0.028282828282828285	-0.052525252525252523	1.3265287081444097e-15	0.0	0.0	0
-0.028282828282828285	-0.05656565656565657	2.114877876283704e-15	0.0	0.0	0
-0.028282828282828285	-0.06060606060606061	3.555374295253652e-15	0.0	0.0	0
-0.028282828282828285	-0.06464646464646465	1.644022548901574e-27	0.0	0.018506352820434207	1
-0.028282828282828285	-0.06868686868686869	1.882816563381005e-25	0.0	0.018331380944204046	1
-0.028282828282828285	-0.07272727272727272	1.5116780059734085e-23	0.0	0.018156409067973885	1
-0.028282828282828285	-0.07676767676767676	3.8040896656774006e-22	0.0	0.017981437191743724	1
-0.028282828282828285	-0.0808080808080808	2.1556422973266678e-20	0.0	0.017806465315513564	1
-0.028282828282828285	-0.08484848484848485	5.75252039939812e-19	0.0	0.017631493439283403	1
-0.028282828282828285	-0.08888888888888889	2.7125331086664765e-17	0.0	0.017456521563053242	1
-0.028282828282828285	-0.09292929292929293	7.50734795842031e-16	0.0	0.01728154968682308	1
-0.028282828282828285	-0.09696969696969697	2.850610629712076e-14	0.0	0.01710657781059292	1
-0.028282828282828285	-0.10101010101010101	7.889435000420863e-13	0.0	0.01693160593436276	1
-0.028282828282828285	-0.10505050505050505	2.0952198688223748e-11	0.0	0.0167566340581326	1
-0.028282828282828285	-0.10909090909090909	6.319382322231204e-10	0.0	0.016581662181902438	1
-0.028282828282828285	-0.11313131313131314	2.0740548683483845e-09	0.0	0.016406690305672277	1
-0.028282828282828285	-0.11717171717171718	2.747950094996817e-10	1.0	0.05184909461830273	1
-0.028282828282828285	-0.12121212121212122	9.62881503331633e-12	1.0	0.051674122742072566	1
-0.028282828282828285	-0.12525252525252525	4.157551974823949e-13	1.0	0.051499150865842405	1
-0.028282828282828285	-0.1292929292929293	1.9587681559935392e-14	1.0	0.051324178989612244	1
-0.028282828282828285	-0.13333333333333333	8.966837535723563e-16	1.0	0.051149207113382084	1
-0.028282828282828285	-0.13737373737373737	3.134004320109106e-17	1.0	0.05097423523715192	1
-0.028282828282828285	-0.1414141414141414	1.4183292968584142e-18	1.0	0.05079926336092176	1
-0.028282828282828285	-0.14545454545454545	4.6618578353133556e-18	1.0	0.0506242914846916	1
-0.028282828282828285	-0.1494949494949495	2.2501380284900255e-16	1.0	0.05044931960846144	1
-0.028282828282828285	-0.15353535353535352	9.336067617496844e-15	1.0	0.05027434773223128	1
-0.028282828282828285	-0.15757575757575756	7.67721867112288e-13	1.0	0.05009937585600112	1
-0.028282828282828285	-0.1616161616161616	3.322920672555615e-11	1.0	0.04992440397977096	1
-0.028282828282828285	-0.16565656565656567	1.2860324925260684e-09	1.0	0.0497494321035408	1
-0.028282828282828285	-0.1696969696969697	1.1301592008596221e-08	1.0	0.049574460227310636	1
-0.028282828282828285	-0.17373737373737375	1.4501810289191277e-09	2.0	0.08501686453994108	1
-0.028282828282828285	-0.17777777777777778	4.776476935275338e-11	2.0	0.08484189266371092	1
-0.028282828282828285	-0.18181818181818182	7.92596240955536e-13	2.0	0.08466692078748075	1
-0.028282828282828285	-0.18585858585858586	2.480992870463238e-14	2.0	0.0844919489112506	1
-0.028282828282828285	-0.1898989898989899	7.129482644609548e-16	2.0	0.08431697703502045	1
-0.028282828282828285	-0.19393939393939394	4.5062678409154284e-17	2.0	0.08414200515879028	1
-0.028282828282828285	-0.19797979797979798	1.1564472904301822e-15	2.0	0.08396703328256011	1
-0.028282828282828285	-0.20202020202020202	5.565797136850337e-14	2.0	0.08379206140632996	1
-0.028282828282828285	-0.20606060606060606	6.3663274440848736e-12	2.0	0.08361708953009979	1
-0.028282828282828285	-0.2101010101010101	3.185169620647203e-10	2.0	0.08344211765386964	1
-0.028282828282828285	-0.21414141414141413	1.23613033164499e-08	2.0	0.08326714577763947	1
-0.028282828282828285	-0.21818181818181817	2.7966015794595853e-08	3.0	0.11870955009026993	1
-0.028282828282828285	-0.2222222222222222	1.3070983939109672e-09	3.0	0.11853457821403976	1
-0.028282828282828285	-0.22626262626262628	3.402402516698281e-11	3.0	0.11835960633780959	1
-0.028282828282828285	-0.23030303030303031	8.888490216014106e-13	3.0	0.11818463446157942	1
-0.028282828282828285	-0.23434343434343435	2.4090114894408636e-14	3.0	0.11800966258534926	1
-0.028282828282828285	-0.2383838383838384	7.296045715048669e-16	3.0	0.11783469070911912	1
-0.028282828282828285	-0.24242424242424243	2.1268021308152142e-14	3.0	0.11765971883288895	1
-0.028282828282828285	-0.24646464646464647	1.1589141081257141e-12	3.0	0.11748474695665878	1
-0.028282828282828285	-0.2505050505050505	7.498859589022162e-11	3.0	0.11730977508042864	1
-0.028282828282828285	-0.2545454545454545	4.278891230327897e-09	3.0	0.11713480320419847	1
-0.028282828282828285	-0.2585858585858586	1.0439572389840525e-07	3.0	0.1169598313279683	1
-0.028282828282828285	-0.26262626262626265	4.2010755638885476e-08	4.0	0.15240223564059874	1
-0.028282828282828285	-0.26666666666666666	1.1851259717225359e-09	4.0	0.15222726376436857	1
-0.028282828282828285	-0.27070707070707073	2.811492493899946e-11	4.0	0.15205229188813843	1
-0.028282828282828285	-0.27474747474747474	2.9165192235082285e-13	4.0	0.15187732001190826	1
-0.028282828282828285	-0.2787878787878788	7.633106425915512e-15	4.0	0.1517023481356781	1
-0.028282828282828285	-0.2828282828282828	4.935339056223381e-14	4.0	0.15152737625944793	1
-0.028282828282828285	-0.2868686868686869	2.585404542169677e-12	4.0	0.1513524043832178	1
-0.028282828282828285	-0.2909090909090909	1.896148826974257e-10	4.0	0.15117743250698762	1
-0.028282828282828285	-0.29494949494949496	1.0491368589126522e-08	4.0	0.15100246063075745	1
-0.028282828282828285	-0.298989898989899	2.2808070118611243e-07	4.0	0.1508274887545273	1
-0.028282828282828285	-0.30303030303030304	6.26099146633664e-08	5.0	0.18626989306715774	1
-0.028282828282828285	-0.30707070707070705	1.4804782438050584e-09	5.0	0.18609492119092758	1
-0.028282828282828285	-0.3111111111111111	3.145393381792706e-11	5.0	0.1859199493146974	1
-0.028282828282828285	-0.3151515151515151	6.838135045041499e-13	5.0	0.18574497743846727	1
-0.028282828282828285	-0.3191919191919192	1.757855900280366e-14	5.0	0.18557000556223713	1
-0.028282828282828285	-0.3232323232323232	6.519555665978101e-13	5.0	0.18539503368600696	1
-0.028282828282828285	-0.32727272727272727	2.8961339032576292e-11	5.0	0.1852200618097768	1
-0.028282828282828285	-0.33131313131313134	1.4944181634141102e-09	5.0	0.18504508993354662	1
-0.028282828282828285	-0.33535353535353535	1.4370541216937256e-07	5.0	0.18487011805731646	1
-0.028282828282828285	-0.3393939393939394	1.5486286239755524e-07	6.0	0.22031252236994692	1
-0.028282828282828285	-0.3434343434343434	4.283211126559041e-09	6.0	0.22013755049371675	1
-0.028282828282828285	-0.3474747474747475	8.50374799078104e-11	6.0	0.21996257861748658	1
-0.028282828282828285	-0.3515151515151515	6.149357941958222e-09	0.0	0.0	0
-0.028282828282828285	-0.35555555555555557	5.850240307324044e-09	0.0	0.0	0
-0.028282828282828285	-0.3595959595959596	5.727045286894543e-09	0.0	0.0	0
-0.028282828282828285	-0.36363636363636365	5.7348882066792085e-09	0.0	0.0	0
-0.028282828282828285	-0.36767676767676766	6.439705297940646e-09	0.0	0.0	0
-0.028282828282828285	-0.3717171717171717	6.392624699579319e-09	0.0	0.0	0
-0.028282828282828285	-0.37575757575757573	6.4748631323992884e-09	0.0	0.0	0
-0.028282828282828285	-0.3797979797979798	6.289328342827541e-09	0.0	0.0	0
-0.028282828282828285	-0.3838383838383838	6.124528311611312e-09	0.0	0.0	0
-0.028282828282828285	-0.3878787878787879	4.956465464051808e-09	0.0	0.0	0
-0.028282828282828285	-0.39191919191919194	4.946267059889319e-09	0.0	0.0	0
-0.028282828282828285	-0.39595959595959596	4.789269217709994e-09	0.0	0.0	0
-0.028282828282828285	-0.4	1.1932919747147803e-14	0.0	0.003983687093330857	1
-0.03232323232323232	-0.0	1.981099447395882e-17	0.0	0.0	0
-0.03232323232323232	-0.00404040404040404	2.574961111223777e-17	0.0	0.0	0
-0.03232323232323232	-0.00808080808080808	3.653238705489345e-17	0.0	0.0	0
-0.03232323232323232	-0.012121212121212121	4.969195254468887e-17	0.0	0.0	0
-0.03232323232323232	-0.01616161616161616	6.814283471045317e-17	0.0	0.0	0
-0.03232323232323232	-0.0202020202020202	9.428531896776668e-17	0.0	0.0	0
-0.03232323232323232	-0.024242424242424242	1.3185386702864566e-16	0.0	0.0	0
-0.03232323232323232	-0.028282828282828285	1.8729723471034187e-16	0.0	0.0	0
-0.03232323232323232	-0.03232323232323232	2.618983066368384e-16	0.0	0.0	0
-0.03232323232323232	-0.03636363636363636	3.651626746370053e-16	0.0	0.0	0
-0.03232323232323232	-0.0404040404040404	5.619954939544391e-16	0.0	0.0	0
-0.03232323232323232	-0.044444444444444446	8.2268764811636e-16	0.0	0.0	0
-0.03232323232323232	-0.048484848484848485	1.2296023278473413e-15	0.0	0.0	0
-0.03232323232323232	-0.052525252525252523	1.8910578285923195e-15	0.0	0.0	0
-0.03232323232323232	-0.05656565656565657	3.051682331667385e-15	0.0	0.0	0
-0.03232323232323232	-0.06060606060606061	4.939579764641424e-15	0.0	0.0	0
-0.03232323232323232	-0.06464646464646465	3.3155294291777056e-27	0.0	0.018482588510248917	1
-0.03232323232323232	-0.06868686868686869	4.43774953190668e-25	0.0	0.018307616634018756	1
-0.03232323232323232	-0.07272727272727272	3.3435749697922066e-23	0.0	0.018132644757788596	1
-0.03232323232323232	-0.07676767676767676	8.782539783409145e-22	0.0	0.017957672881558435	1
-0.03232323232323232	-0.0808080808080808	5.394284441777106e-20	0.0	0.017782701005328274	1
-0.03232323232323232	-0.08484848484848485	1.3766019781198516e-18	0.0	0.017607729129098113	1
-0.03232323232323232	-0.08888888888888889	6.755884117026625e-17	0.0	0.017432757252867952	1
-0.03232323232323232	-0.09292929292929293	1.7834896525496964e-15	0.0	0.01725778537663779	1
-0.03232323232323232	-0.09696969696969697	7.395791343627869e-14	0.0	0.01708281350040763	1
-0.03232323232323232	-0.10101010101010101	2.044015184627009e-12	0.0	0.01690784162417747	1
-0.03232323232323232	-0.10505050505050505	7.38418196554908e-11	0.0	0.01673286974794731	1
-0.03232323232323232	-0.10909090909090909	1.347939270798796e-09	0.0	0.01655789787171715	1
-0.03232323232323232	-0.11313131313131314	2.4517704180189946e-09	1.0	0.0520003021843476	1
-0.03232323232323232	-0.11717171717171718	2.2690358812560258e-10	1.0	0.05182533030811744	1
-0.03232323232323232	-0.12121212121212122	7.729482426117643e-12	1.0	0.051650358431887276	1
-0.03232323232323232	-0.12525252525252525	3.388601417562491e-13	1.0	0.051475386555657116	1
-0.03232323232323232	-0.1292929292929293	1.6180551402734506e-14	1.0	0.051300414679426955	1
-0.03232323232323232	-0.13333333333333333	7.224257743315208e-16	1.0	0.051125442803196794	1
-0.03232323232323232	-0.13737373737373737	2.5234020731933078e-17	1.0	0.05095047092696663	1
-0.03232323232323232	-0.1414141414141414	1.3641729396821158e-18	1.0	0.05077549905073647	1
-0.03232323232323232	-0.14545454545454545	1.3701289731264961e-17	1.0	0.05060052717450631	1
-0.03232323232323232	-0.1494949494949495	6.35558372653048e-16	1.0	0.05042555529827615	1
-0.03232323232323232	-0.15353535353535352	2.6399890880173282e-14	1.0	0.05025058342204599	1
-0.03232323232323232	-0.15757575757575756	2.3021557733974966e-12	1.0	0.05007561154581583	1
-0.03232323232323232	-0.1616161616161616	9.548591004705598e-11	1.0	0.04990063966958567	1
-0.03232323232323232	-0.16565656565656567	3.5795217261531078e-09	1.0	0.04972566779335551	1
-0.03232323232323232	-0.1696969696969697	1.498956653873244e-08	1.0	0.04955069591712535	1
-0.03232323232323232	-0.17373737373737375	1.1235837917459494e-09	2.0	0.08499310022975577	1
-0.03232323232323232	-0.17777777777777778	2.192936556329276e-11	2.0	0.08481812835352562	1
-0.03232323232323232	-0.18181818181818182	6.76550904893238e-13	2.0	0.08464315647729545	1
-0.03232323232323232	-0.18585858585858586	2.0429575405491774e-14	2.0	0.0844681846010653	1
-0.03232323232323232	-0.1898989898989899	6.305285183048219e-16	2.0	0.08429321272483514	1
-0.03232323232323232	-0.19393939393939394	9.221468851509886e-17	2.0	0.08411824084860497	1
-0.03232323232323232	-0.19797979797979798	3.721444062395126e-15	2.0	0.08394326897237481	1
-0.03232323232323232	-0.20202020202020202	1.78881787567537e-13	2.0	0.08376829709614465	1
-0.03232323232323232	-0.20606060606060606	2.1800188381367722e-11	2.0	0.08359332521991449	1
-0.03232323232323232	-0.2101010101010101	1.0814976151128604e-09	2.0	0.08341835334368433	1
-0.03232323232323232	-0.21414141414141413	3.35973034168062e-08	2.0	0.08324338146745416	1
-0.03232323232323232	-0.21818181818181817	2.7283984369380374e-08	3.0	0.11868578578008462	1
-0.03232323232323232	-0.2222222222222222	9.713404444958753e-10	3.0	0.11851081390385447	1
-0.03232323232323232	-0.22626262626262628	2.522206487598159e-11	3.0	0.1183358420276243	1
-0.03232323232323232	-0.23030303030303031	6.859154844886581e-13	3.0	0.11816087015139413	1
-0.03232323232323232	-0.23434343434343435	1.932070709468208e-14	3.0	0.11798589827516398	1
-0.03232323232323232	-0.2383838383838384	1.8211265768042045e-15	3.0	0.11781092639893381	1
-0.03232323232323232	-0.24242424242424243	8.349128992671607e-14	3.0	0.11763595452270366	1
-0.03232323232323232	-0.24646464646464647	4.265172552465231e-12	3.0	0.11746098264647349	1
-0.03232323232323232	-0.2505050505050505	2.659690330301346e-10	3.0	0.11728601077024334	1
-0.03232323232323232	-0.2545454545454545	1.3600636044246846e-08	3.0	0.11711103889401318	1
-0.03232323232323232	-0.2585858585858586	1.8585888918226748e-07	3.0	0.11693606701778302	1
-0.03232323232323232	-0.26262626262626265	2.6268801345561763e-08	4.0	0.15237847133041346	1
-0.03232323232323232	-0.26666666666666666	5.839478896763504e-10	4.0	0.1522034994541833	1
-0.03232323232323232	-0.27070707070707073	5.943937050173961e-12	4.0	0.15202852757795315	1
-0.03232323232323232	-0.27474747474747474	1.3569751808165296e-13	4.0	0.151853555701723	1
-0.03232323232323232	-0.2787878787878788	5.728641468416278e-15	4.0	0.15167858382549282	1
-0.03232323232323232	-0.2828282828282828	1.3346414648279337e-13	4.0	0.15150361194926265	1
-0.03232323232323232	-0.2868686868686869	9.038792924012323e-12	4.0	0.1513286400730325	1
-0.03232323232323232	-0.2909090909090909	5.18076550097005e-10	4.0	0.15115366819680234	1
-0.03232323232323232	-0.29494949494949496	2.5103963330384833e-08	4.0	0.15097869632057218	1
-0.03232323232323232	-0.298989898989899	2.6829059059642215e-07	4.0	0.15080372444434204	1
-0.03232323232323232	-0.30303030303030304	2.7245899637360955e-08	5.0	0.1862461287569725	1
-0.03232323232323232	-0.30707070707070705	5.925934278797503e-10	5.0	0.18607115688074233	1
-0.03232323232323232	-0.3111111111111111	1.2736620055348627e-11	5.0	0.18589618500451216	1
-0.03232323232323232	-0.3151515151515151	1.0367842852942048e-13	5.0	0.185721213128282	1
-0.03232323232323232	-0.3191919191919192	3.454655467048188e-14	5.0	0.18554624125205182	1
-0.03232323232323232	-0.3232323232323232	1.7283536267682446e-12	5.0	0.18537126937582166	1
-0.03232323232323232	-0.32727272727272727	9.259651580419045e-11	5.0	0.1851962974995915	1
-0.03232323232323232	-0.33131313131313134	1.1750648263413425e-08	5.0	0.18502132562336132	1
-0.03232323232323232	-0.33535353535353535	2.3866313874932584e-07	5.0	0.1848463537471312	1
-0.03232323232323232	-0.3393939393939394	6.868238607038084e-08	6.0	0.2202887580597616	1
-0.03232323232323232	-0.3434343434343434	1.546753225991437e-09	6.0	0.22011378618353145	1
-0.03232323232323232	-0.3474747474747475	2.969581188834901e-11	6.0	0.21993881430730128	1
-0.03232323232323232	-0.3515151515151515	5.447539642148977e-09	0.0	0.0	0
-0.03232323232323232	-0.35555555555555557	5.4573893256190885e-09	0.0	0.0	0
-0.03232323232323232	-0.3595959595959596	5.318996865171808e-09	0.0	0.0	0
-0.03232323232323232	-0.36363636363636365	6.0621345451655006e-09	0.0	0.0	0
-0.03232323232323232	-0.36767676767676766	6.115398817708305e-09	0.0	0.0	0
-0.03232323232323232	-0.3717171717171717	6.205463054251778e-09	0.0	0.0	0
-0.03232323232323232	-0.37575757575757573	8.632873880423259e-17	0.0	0.005009754040526534	1
-0.03232323232323232	-0.3797979797979798	3.7902475161407646e-13	0.0	0.0048347821642963735	1
-0.03232323232323232	-0.3838383838383838	1.607647662616034e-11	0.0	0.004659810288066209	1
-0.03232323232323232	-0.3878787878787879	9.430046578047282e-09	0.0	0.004484838411836052	1
-0.03232323232323232	-0.39191919191919194	1.7546314542716646e-08	0.0	0.004309866535605888	1
-0.03232323232323232	-0.39595959595959596	3.011439621496949e-07	0.0	0.00413489465937573	1
-0.03232323232323232	-0.4	5.718433268210209e-06	0.0	0.003959922783145566	1
-0.03636363636363636	-0.0	2.6867995546209956e-17	0.0	0.0	0
-0.03636363636363636	-0.00404040404040404	3.5204521499289226e-17	0.0	0.0	0
-0.03636363636363636	-0.00808080808080808	5.014572627832917e-17	0.0	0.0	0
-0.03636363636363636	-0.012121212121212121	7.321103596125235e-17	0.0	0.0	0
-0.03636363636363636	-0.01616161616161616	1.009501864322705e-16	0.0	0.0	0
-0.03636363636363636	-0.0202020202020202	1.405066082925589e-16	0.0	0.0	0
-0.03636363636363636	-0.024242424242424242	1.9783614849537493e-16	0.0	0.0	0
-0.03636363636363636	-0.028282828282828285	2.8397077038653323e-16	0.0	0.0	0
-0.03636363636363636	-0.03232323232323232	3.9415857475648045e-16	0.0	0.0	0
-0.03636363636363636	-0.03636363636363636	5.497029380262748e-16	0.0	0.0	0
-0.03636363636363636	-0.0404040404040404	8.418055542018105e-16	0.0	0.0	0
-0.03636363636363636	-0.044444444444444446	1.2358584362714553e-15	0.0	0.0	0
-0.03636363636363636	-0.048484848484848485	1.8538555667494045e-15	0.0	0.0	0
-0.03636363636363636	-0.052525252525252523	2.8655720338222218e-15	0.0	0.0	0
-0.03636363636363636	-0.05656565656565657	4.670456571076683e-15	0.0	0.0	0
-0.03636363636363636	-0.06060606060606061	7.297644867732275e-15	0.0	0.0	0
-0.03636363636363636	-0.06464646464646465	6.474037539485809e-27	0.0	0.018458824200063624	1
-0.03636363636363636	-0.06868686868686869	9.462701049295847e-25	0.0	0.018283852323833463	1
-0.03636363636363636	-0.07272727272727272	7.755472251511291e-23	0.0	0.018108880447603302	1
-0.03636363636363636	-0.07676767676767676	1.937163739208702e-21	0.0	0.01793390857137314	1
-0.03636363636363636	-0.0808080808080808	1.2723419653261688e-19	0.0	0.01775893669514298	1
-0.03636363636363636	-0.08484848484848485	6.011208966534542e-18	0.0	0.01758396481891282	1
-0.03636363636363636	-0.08888888888888889	1.6145034557709093e-16	0.0	0.01740899294268266	1
-0.03636363636363636	-0.09292929292929293	6.431014247016359e-15	0.0	0.0172340210664525	1
-0.03636363636363636	-0.09696969696969697	1.8140119080538722e-13	0.0	0.017059049190222338	1
-0.03636363636363636	-0.10101010101010101	5.068926328239494e-12	0.0	0.016884077313992177	1
-0.03636363636363636	-0.10505050505050505	1.8407309932013327e-10	0.0	0.016709105437762016	1
-0.03636363636363636	-0.10909090909090909	2.8199364276604955e-09	0.0	0.016534133561531855	1
-0.03636363636363636	-0.11313131313131314	2.772038401725465e-09	1.0	0.05197653787416231	1
-0.03636363636363636	-0.11717171717171718	1.9796354064389585e-10	1.0	0.05180156599793215	1
-0.03636363636363636	-0.12121212121212122	6.3618508079199806e-12	1.0	0.05162659412170199	1
-0.03636363636363636	-0.12525252525252525	2.83392249689e-13	1.0	0.051451622245471826	1
-0.03636363636363636	-0.1292929292929293	1.3583181510899147e-14	1.0	0.051276650369241665	1
-0.03636363636363636	-0.13333333333333333	6.005156045021576e-16	1.0	0.051101678493011504	1
-0.03636363636363636	-0.13737373737373737	2.0961432847699048e-17	1.0	0.05092670661678134	1
-0.03636363636363636	-0.1414141414141414	1.7840859190651806e-18	1.0	0.05075173474055118	1
-0.03636363636363636	-0.14545454545454545	4.218523848887061e-17	1.0	0.05057676286432102	1
-0.03636363636363636	-0.1494949494949495	1.8689460186697688e-15	1.0	0.05040179098809086	1
-0.03636363636363636	-0.15353535353535352	1.586323952991962e-13	1.0	0.0502268191118607	1
-0.03636363636363636	-0.15757575757575756	7.147775277158221e-12	1.0	0.05005184723563054	1
-0.03636363636363636	-0.1616161616161616	2.9274933410131534e-10	1.0	0.04987687535940038	1
-0.03636363636363636	-0.16565656565656567	9.576131113582057e-09	1.0	0.04970190348317022	1
-0.03636363636363636	-0.1696969696969697	1.6622186831002172e-08	2.0	0.08514430779580065	1
-0.03636363636363636	-0.17373737373737375	8.700954572504061e-10	2.0	0.08496933591957048	1
-0.03636363636363636	-0.17777777777777778	1.6267253411680834e-11	2.0	0.08479436404334033	1
-0.03636363636363636	-0.18181818181818182	5.075717716017739e-13	2.0	0.08461939216711016	1
-0.03636363636363636	-0.18585858585858586	1.5314812343349826e-14	2.0	0.08444442029088	1
-0.03636363636363636	-0.1898989898989899	4.960919713064153e-16	2.0	0.08426944841464985	1
-0.03636363636363636	-0.19393939393939394	3.0243278718074667e-16	2.0	0.08409447653841969	1
-0.03636363636363636	-0.19797979797979798	1.4405155360486866e-14	2.0	0.08391950466218952	1
-0.03636363636363636	-0.20202020202020202	1.5664096864844098e-12	2.0	0.08374453278595936	1
-0.03636363636363636	-0.20606060606060606	8.374048927220452e-11	2.0	0.0835695609097292	1
-0.03636363636363636	-0.2101010101010101	3.994351567366756e-09	2.0	0.08339458903349904	1
-0.03636363636363636	-0.21414141414141413	8.000955562387318e-08	2.0	0.08321961715726887	1
-0.03636363636363636	-0.21818181818181817	2.3268731536401582e-08	3.0	0.11866202146989933	1
-0.03636363636363636	-0.2222222222222222	6.441726289184324e-10	3.0	0.11848704959366918	1
-0.03636363636363636	-0.22626262626262628	1.6121140108711812e-11	3.0	0.11831207771743901	1
-0.03636363636363636	-0.23030303030303031	4.262761698294627e-13	3.0	0.11813710584120884	1
-0.03636363636363636	-0.23434343434343435	5.646078796367108e-15	3.0	0.11796213396497868	1
-0.03636363636363636	-0.2383838383838384	4.705147660989504e-15	3.0	0.11778716208874852	1
-0.03636363636363636	-0.24242424242424243	2.431115265341666e-13	3.0	0.11761219021251837	1
-0.03636363636363636	-0.24646464646464647	1.2000331742705175e-11	3.0	0.1174372183362882	1
-0.03636363636363636	-0.2505050505050505	7.429907886617421e-10	3.0	0.11726224646005805	1
-0.03636363636363636	-0.2545454545454545	3.345199240429559e-08	3.0	0.1170872745838279	1
-0.03636363636363636	-0.2585858585858586	1.9080068338192915e-07	3.0	0.11691230270759773	1
-0.03636363636363636	-0.26262626262626265	1.2783499176825074e-08	4.0	0.15235470702022816	1
-0.03636363636363636	-0.26666666666666666	3.0662699928447246e-10	4.0	0.152179735143998	1
-0.03636363636363636	-0.27070707070707073	3.0008235068768332e-12	4.0	0.15200476326776785	1
-0.03636363636363636	-0.27474747474747474	6.972864541567856e-14	4.0	0.15182979139153768	1
-0.03636363636363636	-0.2787878787878788	8.255542936538786e-15	4.0	0.15165481951530752	1
-0.03636363636363636	-0.2828282828282828	3.576403734349414e-13	4.0	0.15147984763907735	1
-0.03636363636363636	-0.2868686868686869	2.4828151518120062e-11	4.0	0.1513048757628472	1
-0.03636363636363636	-0.2909090909090909	1.3378222892470401e-09	4.0	0.15112990388661704	1
-0.03636363636363636	-0.29494949494949496	5.8545328020842984e-08	4.0	0.15095493201038687	1
-0.03636363636363636	-0.298989898989899	2.2780337884628985e-07	4.0	0.15077996013415673	1
-0.03636363636363636	-0.30303030303030304	1.1016476420272457e-08	5.0	0.1862223644467872	1
-0.03636363636363636	-0.30707070707070705	2.3921197470823965e-10	5.0	0.18604739257055702	1
-0.03636363636363636	-0.3111111111111111	1.855237991483838e-12	5.0	0.18587242069432686	1
-0.03636363636363636	-0.3151515151515151	4.0508054684051545e-14	5.0	0.1856974488180967	1
-0.03636363636363636	-0.3191919191919192	8.722711207593123e-14	5.0	0.18552247694186652	1
-0.03636363636363636	-0.3232323232323232	4.578026173718621e-12	5.0	0.18534750506563635	1
-0.03636363636363636	-0.32727272727272727	2.3794891390768346e-10	5.0	0.18517253318940619	1
-0.03636363636363636	-0.33131313131313134	2.97768876271552e-08	5.0	0.18499756131317602	1
-0.03636363636363636	-0.33535353535353535	3.552711667300126e-07	5.0	0.1848225894369459	1
-0.03636363636363636	-0.3393939393939394	3.336100429818171e-08	6.0	0.2202649937495763	1
-0.03636363636363636	-0.3434343434343434	6.897115705709607e-10	6.0	0.22009002187334614	1
-0.03636363636363636	-0.3474747474747475	1.2528682670601194e-17	6.0	0.21991504999711597	2
-0.03636363636363636	-0.3515151515151515	3.141093237162708e-15	0.0	0.006035820987722207	1
-0.03636363636363636	-0.35555555555555557	4.543404426398398e-12	0.0	0.005860849111492048	1
-0.03636363636363636	-0.3595959595959596	1.2129997669259437e-10	0.0	0.005685877235261887	1
-0.03636363636363636	-0.36363636363636365	2.085688058587541e-10	0.0	0.005510905359031723	1
-0.03636363636363636	-0.36767676767676766	4.6023538739686864e-09	0.0	0.005335933482801562	1
-0.03636363636363636	-0.3717171717171717	8.375790659113314e-09	0.0	0.005160961606571401	1
-0.03636363636363636	-0.37575757575757573	1.5296636583862835e-06	0.0	0.004985989730341244	1
-0.03636363636363636	-0.3797979797979798	2.7495721636045573e-06	0.0	0.004811017854111083	1
-0.03636363636363636	-0.3838383838383838	9.06930973823681e-06	0.0	0.004636045977880919	1
-0.03636363636363636	-0.3878787878787879	8.218024527728332e-06	0.0	0.004461074101650761	1
-0.03636363636363636	-0.39191919191919194	1.3427767813198458e-06	1.0	0.04055404111996693	1
-0.03636363636363636	-0.39595959595959596	6.622483594253411e-07	1.0	0.04037906924373678	1
-0.03636363636363636	-0.4	5.1069837388167934e-08	1.0	0.04020409736750661	1
-0.0404040404040404	-0.0	3.869062062164928e-17	0.0	0.0	0
-0.0404040404040404	-0.00404040404040404	5.1278937024164216e-17	0.0	0.0	0
-0.0404040404040404	-0.00808080808080808	7.432278486503827e-17	0.0	0.0	0
-0.0404040404040404	-0.012121212121212121	1.019763987311458e-16	0.0	0.0	0
-0.0404040404040404	-0.01616161616161616	1.4110299091009137e-16	0.0	0.0	0
-0.0404040404040404	-0.0202020202020202	1.9713189652342399e-16	0.0	0.0	0
-0.0404040404040404	-0.024242424242424242	2.7876794176923384e-16	0.0	0.0	0
-0.0404040404040404	-0.028282828282828285	4.033105021636542e-16	0.0	0.0	0
-0.0404040404040404	-0.03232323232323232	5.562084722915399e-16	0.0	0.0	0
-0.0404040404040404	-0.03636363636363636	7.800712028894803e-16	0.0	0.0	0
-0.0404040404040404	-0.0404040404040404	1.2032192489241166e-15	0.0	0.0	0
-0.0404040404040404	-0.044444444444444446	1.7764647140798648e-15	0.0	0.0	0
-0.0404040404040404	-0.048484848484848485	2.6826386700279174e-15	0.0	0.0	0
-0.0404040404040404	-0.052525252525252523	4.183035993324941e-15	0.0	0.0	0
-0.0404040404040404	-0.05656565656565657	6.929803572518711e-15	0.0	0.0	0
-0.0404040404040404	-0.06060606060606061	1.0557810222854377e-14	0.0	0.0	0
-0.0404040404040404	-0.06464646464646465	1.2694549519189006e-26	0.0	0.018435059889878334	1
-0.0404040404040404	-0.06868686868686869	2.060832775666465e-24	0.0	0.018260088013648174	1
-0.0404040404040404	-0.07272727272727272	1.8152672826024194e-22	0.0	0.018085116137418013	1
-0.0404040404040404	-0.07676767676767676	1.1364370042000356e-20	0.0	0.017910144261187852	1
-0.0404040404040404	-0.0808080808080808	3.0068506777034773e-19	0.0	0.01773517238495769	1
-0.0404040404040404	-0.08484848484848485	1.5079394928492355e-17	0.0	0.01756020050872753	1
-0.0404040404040404	-0.08888888888888889	3.936948044114359e-16	0.0	0.01738522863249737	1
-0.0404040404040404	-0.09292929292929293	1.6473900143255752e-14	0.0	0.01721025675626721	1
-0.0404040404040404	-0.09696969696969697	4.5219273930318313e-13	0.0	0.017035284880037048	1
-0.0404040404040404	-0.10101010101010101	1.2083481106719022e-11	0.0	0.016860313003806887	1
-0.0404040404040404	-0.10505050505050505	4.629516022590943e-10	0.0	0.016685341127576726	1
-0.0404040404040404	-0.10909090909090909	5.250432693094518e-09	0.0	0.016510369251346566	1
-0.0404040404040404	-0.11313131313131314	2.802897153288698e-09	1.0	0.05195277356397702	1
-0.0404040404040404	-0.11717171717171718	1.2325247697020918e-10	1.0	0.05177780168774686	1
-0.0404040404040404	-0.12121212121212122	5.696967933909174e-12	1.0	0.0516028298115167	1
-0.0404040404040404	-0.12525252525252525	2.598699825476259e-13	1.0	0.051427857935286536	1
-0.0404040404040404	-0.1292929292929293	1.2019592385980368e-14	1.0	0.051252886059056375	1
-0.0404040404040404	-0.13333333333333333	3.963762622370977e-16	1.0	0.051077914182826215	1
-0.0404040404040404	-0.13737373737373737	1.7694039332670926e-17	1.0	0.050902942306596054	1
-0.0404040404040404	-0.1414141414141414	3.452554907353772e-18	1.0	0.05072797043036589	1
-0.0404040404040404	-0.14545454545454545	1.2623317697719752e-16	1.0	0.05055299855413573	1
-0.0404040404040404	-0.1494949494949495	5.428190369494099e-15	1.0	0.05037802667790557	1
-0.0404040404040404	-0.15353535353535352	4.904978348873255e-13	1.0	0.05020305480167541	1
-0.0404040404040404	-0.15757575757575756	2.209974534435555e-11	1.0	0.05002808292544525	1
-0.0404040404040404	-0.1616161616161616	9.089397964293492e-10	1.0	0.04985311104921509	1
-0.0404040404040404	-0.16565656565656567	2.3477011925130254e-08	1.0	0.04967813917298493	1
-0.0404040404040404	-0.1696969696969697	1.6867715315349715e-08	2.0	0.08512054348561536	1
-0.0404040404040404	-0.17373737373737375	4.265887271516457e-10	2.0	0.08494557160938519	1
-0.0404040404040404	-0.17777777777777778	1.33446777518973e-11	2.0	0.08477059973315504	1
-0.0404040404040404	-0.18181818181818182	4.050887260470133e-13	2.0	0.08459562785692487	1
-0.0404040404040404	-0.18585858585858586	1.2086137229179902e-14	2.0	0.08442065598069472	1
-0.0404040404040404	-0.1898989898989899	3.87953624877556e-16	2.0	0.08424568410446456	1
-0.0404040404040404	-0.19393939393939394	9.357978958837969e-16	2.0	0.0840707122282344	1
-0.0404040404040404	-0.19797979797979798	4.552203348312986e-14	2.0	0.08389574035200423	1
-0.0404040404040404	-0.20202020202020202	5.493467938491805e-12	2.0	0.08372076847577407	1
-0.0404040404040404	-0.20606060606060606	2.725203011376221e-10	2.0	0.0835457965995439	1
-0.0404040404040404	-0.2101010101010101	1.2549875592929674e-08	2.0	0.08337082472331375	1
-0.0404040404040404	-0.21414141414141413	1.160856123192077e-07	2.0	0.08319585284708358	1
-0.0404040404040404	-0.21818181818181817	1.3452017429672066e-08	3.0	0.11863825715971404	1
-0.0404040404040404	-0.2222222222222222	3.4365617752881506e-10	3.0	0.11846328528348389	1
-0.0404040404040404	-0.22626262626262628	8.511761339333175e-12	3.0	0.11828831340725372	1
-0.0404040404040404	-0.23030303030303031	1.1057263035708596e-13	3.0	0.11811334153102356	1
-0.0404040404040404	-0.23434343434343435	3.0113296943164217e-15	3.0	0.1179383696547934	1
-0.0404040404040404	-0.2383838383838384	1.241009547617888e-14	3.0	0.11776339777856323	1
-0.0404040404040404	-0.24242424242424243	6.246752403438177e-13	3.0	0.11758842590233308	1
-0.0404040404040404	-0.24646464646464647	3.152081577419406e-11	3.0	0.11741345402610291	1
-0.0404040404040404	-0.2505050505050505	1.9219751152681156e-09	3.0	0.11723848214987276	1
-0.0404040404040404	-0.2545454545454545	7.546228385767429e-08	3.0	0.1170635102736426	1
-0.0404040404040404	-0.2585858585858586	1.490238334912055e-07	4.0	0.15250591458627305	1
-0.0404040404040404	-0.26262626262626265	5.907742648255665e-09	4.0	0.15233094271004288	1
-0.0404040404040404	-0.26666666666666666	6.069195783395406e-11	4.0	0.15215597083381271	1
-0.0404040404040404	-0.27070707070707073	1.3071120459099096e-12	4.0	0.15198099895758257	1
-0.0404040404040404	-0.27474747474747474	2.9851822042016815e-14	4.0	0.1518060270813524	1
-0.0404040404040404	-0.2787878787878788	2.1359440741331723e-14	4.0	0.15163105520512224	1
-0.0404040404040404	-0.2828282828282828	1.0890115050228926e-12	4.0	0.15145608332889207	1
-0.0404040404040404	-0.2868686868686869	7.465438688154966e-11	4.0	0.15128111145266193	1
-0.0404040404040404	-0.2909090909090909	3.193679818302471e-09	4.0	0.15110613957643176	1
-0.0404040404040404	-0.29494949494949496	1.196147970175125e-07	4.0	0.1509311677002016	1
-0.0404040404040404	-0.298989898989899	1.4340042045624653e-07	5.0	0.18637357201283206	1
-0.0404040404040404	-0.30303030303030304	4.4452553782241385e-09	5.0	0.1861986001366019	1
-0.0404040404040404	-0.30707070707070705	5.437036779286288e-20	5.0	0.18602362826037172	2
-0.0404040404040404	-0.3111111111111111	7.470267521291731e-18	5.0	0.18584865638414155	2
-0.0404040404040404	-0.3151515151515151	2.0096406164564098e-17	5.0	0.1856736845079114	2
-0.0404040404040404	-0.3191919191919192	2.349032879385685e-15	5.0	0.18549871263168127	2
-0.0404040404040404	-0.3232323232323232	2.3176028848967937e-13	5.0	0.1853237407554511	2
-0.0404040404040404	-0.32727272727272727	1.4253275417371305e-11	5.0	0.18514876887922094	2
-0.0404040404040404	-0.33131313131313134	5.0216333183158446e-11	5.0	0.18497379700299077	2
-0.0404040404040404	-0.33535353535353535	3.728445935739459e-10	6.0	0.22041620131562123	2
-0.0404040404040404	-0.3393939393939394	3.556733792610668e-11	6.0	0.22024122943939106	2
-0.0404040404040404	-0.3434343434343434	2.620825808491303e-10	6.0	0.2200662575631609	2
-0.0404040404040404	-0.3474747474747475	7.669537598233036e-11	6.0	0.21989128568693073	2
-0.0404040404040404	-0.3515151515151515	5.556329703248658e-08	0.0	0.006012056677536916	1
-0.0404040404040404	-0.35555555555555557	8.849578396776677e-08	0.0	0.005837084801306757	1
-0.0404040404040404	-0.3595959595959596	1.1462344178702928e-06	0.0	0.0056621129250765964	1
-0.0404040404040404	-0.36363636363636365	2.12223157768097e-06	0.0	0.005487141048846432	1
-0.0404040404040404	-0.36767676767676766	3.7297041992599994e-06	0.0	0.005312169172616271	1
-0.0404040404040404	-0.3717171717171717	9.566049838000627e-06	0.0	0.0051371972963861106	1
-0.0404040404040404	-0.37575757575757573	8.256145791013104e-06	0.0	0.004962225420155953	1
-0.0404040404040404	-0.3797979797979798	1.331221430439923e-06	1.0	0.040909291569165444	1
-0.0404040404040404	-0.3838383838383838	6.461248565015943e-07	1.0	0.04073431969293528	1
-0.0404040404040404	-0.3878787878787879	5.463206397852798e-08	1.0	0.04055934781670512	1
-0.0404040404040404	-0.39191919191919194	2.3909860480053165e-08	1.0	0.040384375940474955	1
-0.0404040404040404	-0.39595959595959596	1.047852035870648e-08	1.0	0.0402094040642448	1
-0.0404040404040404	-0.4	8.868740351806397e-10	1.0	0.04018033305732132	1
-0.044444444444444446	-0.0	5.374888979914549e-17	0.0	0.0	0
-0.044444444444444446	-0.00404040404040404	7.158749376530554e-17	0.0	0.0	0
-0.044444444444444446	-0.00808080808080808	1.0432856724733578e-16	0.0	0.0	0
-0.044444444444444446	-0.012121212121212121	1.4366592361196087e-16	0.0	0.0	0
-0.044444444444444446	-0.01616161616161616	1.995519485796845e-16	0.0	0.0	0
-0.044444444444444446	-0.0202020202020202	2.799530851464067e-16	0.0	0.0	0
-0.044444444444444446	-0.024242424242424242	3.9780571405682082e-16	0.0	0.0	0
-0.044444444444444446	-0.028282828282828285	5.839820513497177e-16	0.0	0.0	0
-0.044444444444444446	-0.03232323232323232	7.956709127462335e-16	0.0	0.0	0
-0.044444444444444446	-0.03636363636363636	1.1225700897761915e-15	0.0	0.0	0
-0.044444444444444446	-0.0404040404040404	1.7449545453123412e-15	0.0	0.0	0
-0.044444444444444446	-0.044444444444444446	2.5925965459276075e-15	0.0	0.0	0
-0.044444444444444446	-0.048484848484848485	3.9444165420011375e-15	0.0	0.0	0
-0.044444444444444446	-0.052525252525252523	6.2115318247289875e-15	0.0	0.0	0
-0.044444444444444446	-0.05656565656565657	1.0505965681024394e-14	0.0	0.0	0
-0.044444444444444446	-0.06060606060606061	2.2331057762790134e-27	0.0	0.018586267455923206	1
-0.044444444444444446	-0.06464646464646465	2.1918661329923277e-25	0.0	0.018411295579693045	1
-0.044444444444444446	-0.06868686868686869	4.551448541196717e-24	0.0	0.018236323703462884	1
-0.044444444444444446	-0.07272727272727272	4.217872216042586e-22	0.0	0.018061351827232723	1
-0.044444444444444446	-0.07676767676767676	2.858655066176688e-20	0.0	0.017886379951002562	1
-0.044444444444444446	-0.0808080808080808	7.00369148835729e-19	0.0	0.0177114080747724	1
-0.044444444444444446	-0.08484848484848485	3.829201024964348e-17	0.0	0.01753643619854224	1
-0.044444444444444446	-0.08888888888888889	9.618671468178476e-16	0.0	0.01736146432231208	1
-0.044444444444444446	-0.09292929292929293	4.3086881238338806e-14	0.0	0.01718649244608192	1
-0.044444444444444446	-0.09696969696969697	1.1583081717273614e-12	0.0	0.017011520569851758	1
-0.044444444444444446	-0.10101010101010101	2.9779126485140007e-11	0.0	0.016836548693621597	1
-0.044444444444444446	-0.10505050505050505	1.1705706245490135e-09	0.0	0.016661576817391437	1
-0.044444444444444446	-0.10909090909090909	8.993009972235851e-09	0.0	0.016486604941161276	1
-0.044444444444444446	-0.11313131313131314	2.672757110992121e-09	1.0	0.05192900925379172	1
-0.044444444444444446	-0.11717171717171718	1.0513593275112733e-10	1.0	0.05175403737756156	1
-0.044444444444444446	-0.12121212121212122	4.946701426367241e-12	1.0	0.0515790655013314	1
-0.044444444444444446	-0.12525252525252525	2.3176745356351233e-13	1.0	0.05140409362510124	1
-0.044444444444444446	-0.1292929292929293	1.0386993264196666e-14	1.0	0.05122912174887108	1
-0.044444444444444446	-0.13333333333333333	3.5255126108870546e-16	1.0	0.05105414987264092	1
-0.044444444444444446	-0.13737373737373737	1.6245216755137405e-17	1.0	0.05087917799641076	1
-0.044444444444444446	-0.1414141414141414	9.742065009193707e-18	1.0	0.050704206120180596	1
-0.044444444444444446	-0.14545454545454545	3.955926810021833e-16	1.0	0.050529234243950436	1
-0.044444444444444446	-0.1494949494949495	3.509840348075902e-14	1.0	0.050354262367720275	1
-0.044444444444444446	-0.15353535353535352	1.6253126933282294e-12	1.0	0.050179290491490114	1
-0.044444444444444446	-0.15757575757575756	7.081287384189226e-11	1.0	0.05000431861525995	1
-0.044444444444444446	-0.1616161616161616	2.8358836911818583e-09	1.0	0.04982934673902979	1
-0.044444444444444446	-0.16565656565656567	4.6334844072782855e-08	1.0	0.04965437486279963	1
-0.044444444444444446	-0.1696969696969697	1.3929520363309e-08	2.0	0.08509677917543007	1
-0.044444444444444446	-0.17373737373737375	2.910468153499305e-10	2.0	0.0849218072991999	1
-0.044444444444444446	-0.17777777777777778	8.960975841667965e-12	2.0	0.08474683542296975	1
-0.044444444444444446	-0.18181818181818182	2.7534608938652463e-13	2.0	0.08457186354673958	1
-0.044444444444444446	-0.18585858585858586	7.915807965560725e-15	2.0	0.08439689167050943	1
-0.044444444444444446	-0.1898989898989899	2.753828104515691e-16	2.0	0.08422191979427927	1
-0.044444444444444446	-0.19393939393939394	2.4784723054457346e-15	2.0	0.0840469479180491	1
-0.044444444444444446	-0.19797979797979798	2.9433795526648636e-13	2.0	0.08387197604181894	1
-0.044444444444444446	-0.20202020202020202	1.4854352459110124e-11	2.0	0.08369700416558878	1
-0.044444444444444446	-0.20606060606060606	7.278790330727749e-10	2.0	0.08352203228935862	1
-0.044444444444444446	-0.2101010101010101	2.949408919245281e-08	2.0	0.08334706041312846	1
-0.044444444444444446	-0.21414141414141413	1.3415754885552107e-07	2.0	0.0831720885368983	1
-0.044444444444444446	-0.21818181818181817	7.916703459148725e-09	3.0	0.11861449284952875	1
-0.044444444444444446	-0.2222222222222222	2.0410330043095072e-10	3.0	0.1184395209732986	1
-0.044444444444444446	-0.22626262626262628	4.483033437151086e-12	3.0	0.11826454909706843	1
-0.044444444444444446	-0.23030303030303031	5.391230757952215e-14	3.0	0.11808957722083827	1
-0.044444444444444446	-0.23434343434343435	1.963687610413399e-15	3.0	0.1179146053446081	1
-0.044444444444444446	-0.2383838383838384	3.2803578294222413e-14	3.0	0.11773963346837794	1
-0.044444444444444446	-0.24242424242424243	1.6146817115395942e-12	3.0	0.11756466159214779	1
-0.044444444444444446	-0.24646464646464647	9.261934440401213e-11	3.0	0.11738968971591762	1
-0.044444444444444446	-0.2505050505050505	4.5599391173129436e-09	3.0	0.11721471783968747	1
-0.044444444444444446	-0.2545454545454545	1.3805813319260098e-07	3.0	0.11703974596345731	1
-0.044444444444444446	-0.2585858585858586	4.129524211503108e-21	4.0	0.15248215027608775	2
-0.044444444444444446	-0.26262626262626265	-4.2101869610932543e-20	4.0	0.15230717839985758	2
-0.044444444444444446	-0.26666666666666666	9.125698806719143e-19	4.0	0.1521322065236274	2
-0.044444444444444446	-0.27070707070707073	2.2792114372674334e-18	4.0	0.15195723464739727	2
-0.044444444444444446	-0.27474747474747474	5.83921743620375e-18	4.0	0.1517822627711671	2
-0.044444444444444446	-0.2787878787878788	4.750843603638601e-16	4.0	0.15160729089493694	2
-0.044444444444444446	-0.2828282828282828	1.2789117889317496e-15	4.0	0.15143231901870677	2
-0.044444444444444446	-0.2868686868686869	3.6496228172645655e-15	4.0	0.15125734714247663	2
-0.044444444444444446	-0.2909090909090909	2.2910451893976e-13	4.0	0.15108237526624646	2
-0.044444444444444446	-0.29494949494949496	4.904473450321852e-13	4.0	0.1509074033900163	2
-0.044444444444444446	-0.298989898989899	1.1155429347913767e-12	5.0	0.18634980770264675	2
-0.044444444444444446	-0.30303030303030304	1.2646585343181791e-13	5.0	0.18617483582641658	2
-0.044444444444444446	-0.30707070707070705	1.3265177414090097e-13	5.0	0.18599986395018642	2
-0.044444444444444446	-0.3111111111111111	5.643185839157779e-12	5.0	0.18582489207395625	2
-0.044444444444444446	-0.3151515151515151	4.2419067584942365e-11	5.0	0.1856499201977261	2
-0.044444444444444446	-0.3191919191919192	1.5801114528671227e-10	5.0	0.18547494832149597	2
-0.044444444444444446	-0.3232323232323232	5.406180068961e-09	5.0	0.1852999764452658	2
-0.044444444444444446	-0.32727272727272727	2.0152331936079017e-08	5.0	0.18512500456903563	2
-0.044444444444444446	-0.33131313131313134	5.920412469767716e-08	5.0	0.18495003269280547	2
-0.044444444444444446	-0.33535353535353535	6.875796119935568e-08	6.0	0.22039243700543593	2
-0.044444444444444446	-0.3393939393939394	1.1276762261566897e-08	6.0	0.22021746512920576	2
-0.044444444444444446	-0.3434343434343434	1.0240166056832755e-07	6.0	0.2200424932529756	2
-0.044444444444444446	-0.3474747474747475	5.323814132500362e-08	6.0	0.21986752137674542	2
-0.044444444444444446	-0.3515151515151515	1.2572276229273341e-05	0.0	0.005988292367351626	1
-0.044444444444444446	-0.35555555555555557	1.4012441527346948e-05	0.0	0.005813320491121467	1
-0.044444444444444446	-0.3595959595959596	4.828173171830603e-06	1.0	0.04143497705073081	1
-0.044444444444444446	-0.36363636363636365	2.6355061148422226e-06	1.0	0.04126000517450065	1
-0.044444444444444446	-0.36767676767676766	2.3315551030500385e-07	1.0	0.041085033298270485	1
-0.044444444444444446	-0.3717171717171717	1.0694705298884581e-07	1.0	0.04107833113303698	1
-0.044444444444444446	-0.37575757575757573	4.89286872811505e-08	1.0	0.04090335925680682	1
-0.044444444444444446	-0.3797979797979798	4.72622211915518e-09	1.0	0.04072838738057666	1
-0.044444444444444446	-0.3838383838383838	2.0538404262673715e-09	1.0	0.04055341550434649	1
-0.044444444444444446	-0.3878787878787879	8.933179546901577e-10	1.0	0.04037844362811634	1
-0.044444444444444446	-0.39191919191919194	8.868994919579539e-11	1.0	0.04036061163028966	1
-0.044444444444444446	-0.39595959595959596	3.673945957671518e-11	1.0	0.040185639754059505	1
-0.044444444444444446	-0.4	3.893026497387715e-12	1.0	0.04001066787782934	1
-0.048484848484848485	-0.0	7.562716940293981e-17	0.0	0.0	0
-0.048484848484848485	-0.00404040404040404	1.0122541592577031e-16	0.0	0.0	0
-0.048484848484848485	-0.00808080808080808	1.4838626059046215e-16	0.0	0.0	0
-0.048484848484848485	-0.012121212121212121	2.0517471243566063e-16	0.0	0.0	0
-0.048484848484848485	-0.01616161616161616	2.8623187933049994e-16	0.0	0.0	0
-0.048484848484848485	-0.0202020202020202	4.0346769049646113e-16	0.0	0.0	0
-0.048484848484848485	-0.024242424242424242	5.76516877999906e-16	0.0	0.0	0
-0.048484848484848485	-0.028282828282828285	8.373614968255895e-16	0.0	0.0	0
-0.048484848484848485	-0.03232323232323232	1.1575484091585922e-15	0.0	0.0	0
-0.048484848484848485	-0.03636363636363636	1.7557514288619024e-15	0.0	0.0	0
-0.048484848484848485	-0.0404040404040404	2.577612620663643e-15	0.0	0.0	0
-0.048484848484848485	-0.044444444444444446	3.858018234165395e-15	0.0	0.0	0
-0.048484848484848485	-0.048484848484848485	5.921211522058437e-15	0.0	0.0	0
-0.048484848484848485	-0.052525252525252523	9.43401741842345e-15	0.0	0.0	0
-0.048484848484848485	-0.05656565656565657	1.6455205394007717e-14	0.0	0.0	0
-0.048484848484848485	-0.06060606060606061	4.713398374060764e-27	0.0	0.018562503145737916	1
-0.048484848484848485	-0.06464646464646465	4.903794310305703e-25	0.0	0.018387531269507755	1
-0.048484848484848485	-0.06868686868686869	3.9857002102046533e-23	0.0	0.018212559393277594	1
-0.048484848484848485	-0.07272727272727272	9.88942110875646e-22	0.0	0.018037587517047433	1
-0.048484848484848485	-0.07676767676767676	7.239764918846442e-20	0.0	0.017862615640817273	1
-0.048484848484848485	-0.0808080808080808	1.6812792880843749e-18	0.0	0.017687643764587112	1
-0.048484848484848485	-0.08484848484848485	8.997030633405551e-17	0.0	0.01751267188835695	1
-0.048484848484848485	-0.08888888888888889	2.3537949220098313e-15	0.0	0.01733770001212679	1
-0.048484848484848485	-0.09292929292929293	1.1424656474427525e-13	0.0	0.01716272813589663	1
-0.048484848484848485	-0.09696969696969697	3.0465611107524454e-12	0.0	0.01698775625966647	1
-0.048484848484848485	-0.10101010101010101	1.1338668324471201e-10	0.0	0.016812784383436308	1
-0.048484848484848485	-0.10505050505050505	2.9856151216057297e-09	0.0	0.016637812507206147	1
-0.048484848484848485	-0.10909090909090909	1.4475507565861525e-08	0.0	0.016462840630975986	1
-0.048484848484848485	-0.11313131313131314	2.6129557368265717e-09	1.0	0.05190524494360643	1
-0.048484848484848485	-0.11717171717171718	9.788235237532453e-11	1.0	0.05173027306737627	1
-0.048484848484848485	-0.12121212121212122	4.342739833383841e-12	1.0	0.05155530119114611	1
-0.048484848484848485	-0.12525252525252525	2.0883787131497255e-13	1.0	0.05138032931491595	1
-0.048484848484848485	-0.1292929292929293	6.9672935614553725e-15	1.0	0.05120535743868579	1
-0.048484848484848485	-0.13333333333333333	3.008798274715904e-16	1.0	0.05103038556245563	1
-0.048484848484848485	-0.13737373737373737	1.4257701783448816e-17	1.0	0.05085541368622547	1
-0.048484848484848485	-0.1414141414141414	2.817142072109872e-17	1.0	0.05068044180999531	1
-0.048484848484848485	-0.14545454545454545	1.1649063905898345e-15	1.0	0.050505469933765146	1
-0.048484848484848485	-0.1494949494949495	1.0752458782962852e-13	1.0	0.050330498057534985	1
-0.048484848484848485	-0.15353535353535352	4.939149553470803e-12	1.0	0.050155526181304824	1
-0.048484848484848485	-0.15757575757575756	1.9533191587923254e-10	1.0	0.04998055430507466	1
-0.048484848484848485	-0.1616161616161616	7.2161848346514455e-09	1.0	0.0498055824288445	1
-0.048484848484848485	-0.16565656565656567	6.415400685857856e-08	1.0	0.04963061055261434	1
-0.048484848484848485	-0.1696969696969697	5.6101314636000495e-09	2.0	0.08507301486524478	1
-0.048484848484848485	-0.17373737373737375	1.6701997988679335e-10	2.0	0.08489804298901461	1
-0.048484848484848485	-0.17777777777777778	4.906718193383641e-12	2.0	0.08472307111278446	1
-0.048484848484848485	-0.18181818181818182	1.526326972095527e-13	2.0	0.08454809923655429	1
-0.048484848484848485	-0.18585858585858586	4.381826190726808e-15	2.0	0.08437312736032414	1
-0.048484848484848485	-0.1898989898989899	2.6280645867284415e-16	2.0	0.08419815548409398	1
-0.048484848484848485	-0.19393939393939394	6.294802982234403e-15	2.0	0.08402318360786382	1
-0.048484848484848485	-0.19797979797979798	7.907804296826935e-13	2.0	0.08384821173163365	1
-0.048484848484848485	-0.20202020202020202	3.8881979309214134e-11	2.0	0.0836732398554035	1
-0.048484848484848485	-0.20606060606060606	6.920215619962354e-20	2.0	0.08349826797917333	2
-0.048484848484848485	-0.2101010101010101	1.8912485807117457e-19	2.0	0.08332329610294317	2
-0.048484848484848485	-0.21414141414141413	1.6156777598636043e-19	3.0	0.11876570041557362	2
-0.048484848484848485	-0.21818181818181817	3.235307600083367e-20	3.0	0.11859072853934347	2
-0.048484848484848485	-0.2222222222222222	1.398324895303067e-19	3.0	0.11841575666311331	2
-0.048484848484848485	-0.22626262626262628	3.4132641453663524e-19	3.0	0.11824078478688314	2
-0.048484848484848485	-0.23030303030303031	8.53789415511788e-19	3.0	0.11806581291065298	2
-0.048484848484848485	-0.23434343434343435	2.129290847376601e-18	3.0	0.11789084103442282	2
-0.048484848484848485	-0.2383838383838384	4.561934220986116e-18	3.0	0.11771586915819265	2
-0.048484848484848485	-0.24242424242424243	2.625703653149044e-16	3.0	0.1175408972819625	2
-0.048484848484848485	-0.24646464646464647	7.189837595438136e-16	3.0	0.11736592540573233	2
-0.048484848484848485	-0.2505050505050505	1.863212135282584e-15	3.0	0.11719095352950218	2
-0.048484848484848485	-0.2545454545454545	3.475403939953826e-15	3.0	0.11701598165327202	2
-0.048484848484848485	-0.2585858585858586	4.67689516333486e-15	4.0	0.15245838596590247	2
-0.048484848484848485	-0.26262626262626265	1.0130801493320108e-15	4.0	0.1522834140896723	2
-0.048484848484848485	-0.26666666666666666	2.301063206101487e-15	4.0	0.15210844221344214	2
-0.048484848484848485	-0.27070707070707073	7.611911830412334e-15	4.0	0.151933470337212	2
-0.048484848484848485	-0.27474747474747474	2.809991946400761e-13	4.0	0.15175849846098183	2
-0.048484848484848485	-0.2787878787878788	8.812928037663194e-13	4.0	0.15158352658475166	2
-0.048484848484848485	-0.2828282828282828	2.75418621604882e-12	4.0	0.1514085547085215	2
-0.048484848484848485	-0.2868686868686869	1.1543712348160887e-10	4.0	0.15123358283229135	2
-0.048484848484848485	-0.2909090909090909	3.1311589625104734e-09	4.0	0.15105861095606118	2
-0.048484848484848485	-0.29494949494949496	3.589734103236291e-09	5.0	0.18650101526869162	2
-0.048484848484848485	-0.298989898989899	1.8983057221491863e-10	5.0	0.18632604339246148	2
-0.048484848484848485	-0.30303030303030304	1.131610246718827e-10	5.0	0.18615107151623134	2
-0.048484848484848485	-0.30707070707070705	1.365059504534867e-10	5.0	0.18597609964000117	2
-0.048484848484848485	-0.3111111111111111	5.999358841815894e-11	5.0	0.185801127763771	2
-0.048484848484848485	-0.3151515151515151	2.84556919445721e-09	5.0	0.18562615588754083	2
-0.048484848484848485	-0.3191919191919192	1.81780149885758e-07	5.0	0.18545118401131067	2
-0.048484848484848485	-0.3232323232323232	2.829379533961129e-06	5.0	0.1852762121350805	2
-0.048484848484848485	-0.32727272727272727	1.0322130506819053e-05	5.0	0.18510124025885033	2
-0.048484848484848485	-0.33131313131313134	4.847246546295171e-06	6.0	0.2205436445714808	2
-0.048484848484848485	-0.33535353535353535	1.264911230403054e-06	6.0	0.22036867269525062	2
-0.048484848484848485	-0.3393939393939394	3.929178704409674e-06	6.0	0.22019370081902045	2
-0.048484848484848485	-0.3434343434343434	1.576992693830256e-06	6.0	0.2200187289427903	2
-0.048484848484848485	-0.3474747474747475	3.7772358586675114e-06	1.0	0.041756876122257106	1
-0.048484848484848485	-0.3515151515151515	2.0032649524882703e-06	1.0	0.041581904246026945	1
-0.048484848484848485	-0.35555555555555557	1.0129848102486614e-06	1.0	0.041406932369796784	1
-0.048484848484848485	-0.3595959595959596	1.0352889328104307e-07	1.0	0.04123196049356662	1
-0.048484848484848485	-0.36363636363636365	4.759090719557305e-08	1.0	0.04105698861733646	1
-0.048484848484848485	-0.36767676767676766	2.1865822100670972e-08	1.0	0.041061268988085195	1
-0.048484848484848485	-0.3717171717171717	2.263361575806401e-09	1.0	0.04088629711185504	1
-0.048484848484848485	-0.37575757575757573	8.223039294114281e-10	1.0	0.04071132523562488	1
-0.048484848484848485	-0.3797979797979798	3.5935988604062655e-10	1.0	0.04053635335939472	1
-0.048484848484848485	-0.3838383838383838	3.849875239569244e-11	1.0	0.04036138148316455	1
-0.048484848484848485	-0.3878787878787879	4.369995517505781e-12	1.0	0.0401864096069344	1
-0.048484848484848485	-0.39191919191919194	5.351861549857023e-13	1.0	0.04017970744170088	1
-0.048484848484848485	-0.39595959595959596	2.1312276851858467e-13	1.0	0.040004735565470725	1
-0.048484848484848485	-0.4	8.441903813916432e-14	1.0	0.03982976368924056	1
-0.052525252525252523	-0.0	1.0806471414090914e-16	0.0	0.0	0
-0.052525252525252523	-0.00404040404040404	1.4541361848246322e-16	0.0	0.0	0
-0.052525252525252523	-0.00808080808080808	2.1453736211640111e-16	0.0	0.0	0
-0.052525252525252523	-0.012121212121212121	2.9808552741813985e-16	0.0	0.0	0
-0.052525252525252523	-0.01616161616161616	4.180168470876189e-16	0.0	0.0	0
-0.052525252525252523	-0.0202020202020202	5.926043435614755e-16	0.0	0.0	0
-0.052525252525252523	-0.024242424242424242	8.525439788284392e-16	0.0	0.0	0
-0.052525252525252523	-0.028282828282828285	1.2324566926872238e-15	0.0	0.0	0
-0.052525252525252523	-0.03232323232323232	1.722694941321986e-15	0.0	0.0	0
-0.052525252525252523	-0.03636363636363636	2.6410221420415125e-15	0.0	0.0	0
-0.052525252525252523	-0.0404040404040404	3.913003791958914e-15	0.0	0.0	0
-0.052525252525252523	-0.044444444444444446	5.909160737349829e-15	0.0	0.0	0
-0.052525252525252523	-0.048484848484848485	9.118493935665883e-15	0.0	0.0	0
-0.052525252525252523	-0.052525252525252523	1.467419346478902e-14	0.0	0.0	0
-0.052525252525252523	-0.05656565656565657	2.5804037751156456e-14	0.0	0.0	0
-0.052525252525252523	-0.06060606060606061	8.720426572590851e-27	0.0	0.018538738835552623	1
-0.052525252525252523	-0.06464646464646465	1.1146152952728058e-24	0.0	0.018363766959322462	1
-0.052525252525252523	-0.06868686868686869	1.0270795620107612e-22	0.0	0.0181887950830923	1
-0.052525252525252523	-0.07272727272727272	2.3841950834948206e-21	0.0	0.01801382320686214	1
-0.052525252525252523	-0.07676767676767676	1.717085450342282e-19	0.0	0.01783885133063198	1
-0.052525252525252523	-0.0808080808080808	8.200043302024793e-18	0.0	0.01766387945440182	1
-0.052525252525252523	-0.08484848484848485	2.4326899852973543e-16	0.0	0.017488907578171658	1
-0.052525252525252523	-0.08888888888888889	1.0196539250258024e-14	0.0	0.017313935701941497	1
-0.052525252525252523	-0.09292929292929293	3.2103687343989175e-13	0.0	0.017138963825711336	1
-0.052525252525252523	-0.09696969696969697	8.201110718436122e-12	0.0	0.016963991949481175	1
-0.052525252525252523	-0.10101010101010101	3.1573352521111256e-10	0.0	0.016789020073251015	1
-0.052525252525252523	-0.10505050505050505	7.235055387429593e-09	0.0	0.016614048197020854	1
-0.052525252525252523	-0.10909090909090909	1.950914887823479e-08	0.0	0.016439076320790693	1
-0.052525252525252523	-0.11313131313131314	1.677699422816165e-09	1.0	0.05188148063342114	1
-0.052525252525252523	-0.11717171717171718	7.866007073970123e-11	1.0	0.05170650875719098	1
-0.052525252525252523	-0.12121212121212122	3.471003478440328e-12	1.0	0.05153153688096082	1
-0.052525252525252523	-0.12525252525252525	1.56513708863018e-13	1.0	0.05135656500473066	1
-0.052525252525252523	-0.1292929292929293	5.167295914005814e-15	1.0	0.0511815931285005	1
-0.052525252525252523	-0.13333333333333333	2.235113537181889e-16	1.0	0.05100662125227034	1
-0.052525252525252523	-0.13737373737373737	1.1571974813374005e-17	1.0	0.05083164937604018	1
-0.052525252525252523	-0.1414141414141414	3.727216897732434e-23	1.0	0.05065667749981002	2
-0.052525252525252523	-0.14545454545454545	7.504989454699307e-23	1.0	0.050481705623579856	2
-0.052525252525252523	-0.1494949494949495	1.42994304720213e-22	1.0	0.050306733747349695	2
-0.052525252525252523	-0.15353535353535352	1.0047533925047127e-20	1.0	0.050131761871119535	2
-0.052525252525252523	-0.15757575757575756	2.1010820721177866e-20	1.0	0.049956789994889374	2
-0.052525252525252523	-0.1616161616161616	4.293845791843393e-20	1.0	0.04978181811865921	2
-0.052525252525252523	-0.16565656565656567	2.6980025240381777e-20	1.0	0.04960684624242905	2
-0.052525252525252523	-0.1696969696969697	7.989598040212629e-20	2.0	0.08504925055505949	2
-0.052525252525252523	-0.17373737373737375	-4.0620452343087795e-21	2.0	0.08487427867882932	2
-0.052525252525252523	-0.17777777777777778	-3.039894848408938e-20	2.0	0.08469930680259917	2
-0.052525252525252523	-0.18181818181818182	6.100677439315022e-20	2.0	0.084524334926369	2
-0.052525252525252523	-0.18585858585858586	1.6279621489513855e-19	2.0	0.08434936305013885	2
-0.052525252525252523	-0.1898989898989899	3.917463309336722e-19	2.0	0.0841743911739087	2
-0.052525252525252523	-0.19393939393939394	1.0055414070177186e-18	2.0	0.08399941929767853	2
-0.052525252525252523	-0.19797979797979798	2.3548115608379905e-18	2.0	0.08382444742144836	2
-0.052525252525252523	-0.20202020202020202	5.60043187589613e-18	2.0	0.0836494755452182	2
-0.052525252525252523	-0.20606060606060606	2.2022281772993012e-16	2.0	0.08347450366898804	2
-0.052525252525252523	-0.2101010101010101	4.875786729524237e-16	2.0	0.08329953179275788	2
-0.052525252525252523	-0.21414141414141413	1.6377965073534178e-16	3.0	0.11874193610538833	2
-0.052525252525252523	-0.21818181818181817	1.4697723321733578e-17	3.0	0.11856696422915818	2
-0.052525252525252523	-0.2222222222222222	1.3832480118694787e-16	3.0	0.11839199235292802	2
-0.052525252525252523	-0.22626262626262628	4.361290307607894e-15	3.0	0.11821702047669785	2
-0.052525252525252523	-0.23030303030303031	1.602556511452929e-14	3.0	0.11804204860046769	2
-0.052525252525252523	-0.23434343434343435	4.695905062163623e-14	3.0	0.11786707672423752	2
-0.052525252525252523	-0.2383838383838384	1.3615006493710776e-13	3.0	0.11769210484800736	2
-0.052525252525252523	-0.24242424242424243	3.9454888650083093e-13	3.0	0.11751713297177721	2
-0.052525252525252523	-0.24646464646464647	1.1790374473509564e-12	3.0	0.11734216109554704	2
-0.052525252525252523	-0.2505050505050505	2.5391297111282225e-11	3.0	0.11716718921931689	2
-0.052525252525252523	-0.2545454545454545	2.8182174093971977e-11	4.0	0.15260959353194734	2
-0.052525252525252523	-0.2585858585858586	1.5670599177501811e-12	4.0	0.15243462165571717	2
-0.052525252525252523	-0.26262626262626265	7.072065623649626e-13	4.0	0.152259649779487	2
-0.052525252525252523	-0.26666666666666666	7.888711893034617e-13	4.0	0.15208467790325683	2
-0.052525252525252523	-0.27070707070707073	4.506435159044016e-12	4.0	0.1519097060270267	2
-0.052525252525252523	-0.27474747474747474	1.383613916214754e-10	4.0	0.15173473415079652	2
-0.052525252525252523	-0.2787878787878788	9.090693970234181e-10	4.0	0.15155976227456636	2
-0.052525252525252523	-0.2828282828282828	3.2417993332419258e-09	4.0	0.1513847903983362	2
-0.052525252525252523	-0.2868686868686869	7.125718116568505e-08	4.0	0.15120981852210605	2
-0.052525252525252523	-0.2909090909090909	2.2241920269947173e-07	4.0	0.15103484664587588	2
-0.052525252525252523	-0.29494949494949496	4.2408534166880826e-08	5.0	0.1864772509585063	2
-0.052525252525252523	-0.298989898989899	6.158705294831492e-09	5.0	0.18630227908227617	2
-0.052525252525252523	-0.30303030303030304	2.411025894159574e-08	5.0	0.18612730720604603	2
-0.052525252525252523	-0.30707070707070705	2.708320914091545e-09	5.0	0.18595233532981587	2
-0.052525252525252523	-0.3111111111111111	4.3826862628872755e-10	5.0	0.1857773634535857	2
-0.052525252525252523	-0.3151515151515151	1.3125218392952918e-08	5.0	0.18560239157735553	2
-0.052525252525252523	-0.3191919191919192	3.364132348314694e-07	6.0	0.221044795889986	2
-0.052525252525252523	-0.3232323232323232	1.2007959796552788e-06	6.0	0.22086982401375582	2
-0.052525252525252523	-0.32727272727272727	2.215807500113411e-06	6.0	0.22069485213752565	2
-0.052525252525252523	-0.33131313131313134	3.7130200310194057e-06	6.0	0.2205198802612955	2
-0.052525252525252523	-0.33535353535353535	1.0888291019350961e-05	6.0	0.22034490838506532	2
-0.052525252525252523	-0.3393939393939394	5.7455932190725015e-06	7.0	0.2557873126976958	2
-0.052525252525252523	-0.3434343434343434	1.868112437789785e-07	7.0	0.2556123408214656	2
-0.052525252525252523	-0.3474747474747475	1.978142929089217e-08	1.0	0.041733111812071816	1
-0.052525252525252523	-0.3515151515151515	9.022093401337e-09	1.0	0.041558139935841655	1
-0.052525252525252523	-0.35555555555555557	4.1262497444324676e-09	1.0	0.041383168059611494	1
-0.052525252525252523	-0.3595959595959596	5.175936243858704e-10	1.0	0.04120819618338133	1
-0.052525252525252523	-0.36363636363636365	2.2464662010274827e-10	1.0	0.04103322430715117	1
-0.052525252525252523	-0.36767676767676766	9.567356422654822e-11	1.0	0.040858252430921005	1
-0.052525252525252523	-0.3717171717171717	4.100226875798535e-11	1.0	0.04068328055469085	1
-0.052525252525252523	-0.37575757575757573	4.974236286568622e-12	1.0	0.04050830867846069	1
-0.052525252525252523	-0.3797979797979798	2.040339672445105e-12	1.0	0.04033333680223053	1
-0.052525252525252523	-0.3838383838383838	8.381733375717997e-13	1.0	0.04015836492600036	1
-0.052525252525252523	-0.3878787878787879	8.788505103948798e-14	1.0	0.04016264529674911	1
-0.052525252525252523	-0.39191919191919194	3.885458546439104e-14	1.0	0.03998767342051894	1
-0.052525252525252523	-0.39595959595959596	1.1439391916702724e-13	1.0	0.03981270154428879	1
-0.052525252525252523	-0.4	3.1653098390913316e-13	1.0	0.03963772966805862	1
-0.05656565656565657	-0.0	1.5755768608210995e-16	0.0	0.0	0
-0.05656565656565657	-0.00404040404040404	2.133673703760642e-16	0.0	0.0	0
-0.05656565656565657	-0.00808080808080808	3.1720534326821097e-16	0.0	0.0	0
-0.05656565656565657	-0.012121212121212121	4.436468860283821e-16	0.0	0.0	0
-0.05656565656565657	-0.01616161616161616	6.268962922692088e-16	0.0	0.0	0
-0.05656565656565657	-0.0202020202020202	8.950362295955937e-16	0.0	0.0	0
-0.05656565656565657	-0.024242424242424242	1.29360367483179e-15	0.0	0.0	0
-0.05656565656565657	-0.028282828282828285	1.8612846469716885e-15	0.0	0.0	0
-0.05656565656565657	-0.03232323232323232	2.6236584346007894e-15	0.0	0.0	0
-0.05656565656565657	-0.03636363636363636	4.047239569114994e-15	0.0	0.0	0
-0.05656565656565657	-0.0404040404040404	6.03496901527135e-15	0.0	0.0	0
-0.05656565656565657	-0.044444444444444446	9.199182755435632e-15	0.0	0.0	0
-0.05656565656565657	-0.048484848484848485	1.4440025483525414e-14	0.0	0.0	0
-0.05656565656565657	-0.052525252525252523	2.3741271171706106e-14	0.0	0.0	0
-0.05656565656565657	-0.05656565656565657	4.1468339525692453e-14	0.0	0.0	0
-0.05656565656565657	-0.06060606060606061	1.8802811829572056e-26	0.0	0.018514974525367333	1
-0.05656565656565657	-0.06464646464646465	2.6832804095888005e-24	0.0	0.018340002649137172	1
-0.05656565656565657	-0.06868686868686869	2.710503270867785e-22	0.0	0.01816503077290701	1
-0.05656565656565657	-0.07272727272727272	5.99031715435551e-21	0.0	0.01799005889667685	1
-0.05656565656565657	-0.07676767676767676	4.421221425414574e-19	0.0	0.01781508702044669	1
-0.05656565656565657	-0.0808080808080808	2.19050425732893e-17	0.0	0.01764011514421653	1
-0.05656565656565657	-0.08484848484848485	7.604840836671598e-23	0.0	0.017465143267986368	2
-0.05656565656565657	-0.08888888888888889	1.0359041020511308e-22	0.0	0.017290171391756207	2
-0.05656565656565657	-0.09292929292929293	3.88635347348624e-20	0.0	0.017115199515526047	2
-0.05656565656565657	-0.09696969696969697	1.5716415009449117e-21	0.0	0.016940227639295886	2
-0.05656565656565657	-0.10101010101010101	3.5278150215212726e-21	0.0	0.016765255763065725	2
-0.05656565656565657	-0.10505050505050505	6.892781455977146e-21	0.0	0.016590283886835564	2
-0.05656565656565657	-0.10909090909090909	5.426528251504768e-22	1.0	0.052032688199466014	2
-0.05656565656565657	-0.11313131313131314	3.326820351630958e-22	1.0	0.05185771632323585	2
-0.05656565656565657	-0.11717171717171718	4.666721425047811e-23	1.0	0.05168274444700569	2
-0.05656565656565657	-0.12121212121212122	1.1057440955550463e-22	1.0	0.05150777257077553	2
-0.05656565656565657	-0.12525252525252525	2.274283759052793e-22	1.0	0.05133280069454537	2
-0.05656565656565657	-0.1292929292929293	5.044155308619036e-22	1.0	0.05115782881831521	2
-0.05656565656565657	-0.13333333333333333	1.0465742691994138e-20	1.0	0.05098285694208505	2
-0.05656565656565657	-0.13737373737373737	2.424828829331563e-20	1.0	0.05080788506585489	2
-0.05656565656565657	-0.1414141414141414	5.406298242473242e-20	1.0	0.05063291318962473	2
-0.05656565656565657	-0.14545454545454545	1.3425577099684391e-19	1.0	0.050457941313394566	2
-0.05656565656565657	-0.1494949494949495	3.0731611590510834e-19	1.0	0.050282969437164406	2
-0.05656565656565657	-0.15353535353535352	8.073726248959516e-18	1.0	0.050107997560934245	2
-0.05656565656565657	-0.15757575757575756	1.934343421270095e-17	1.0	0.049933025684704084	2
-0.05656565656565657	-0.1616161616161616	4.2450271304627415e-17	1.0	0.04975805380847392	2
-0.05656565656565657	-0.16565656565656567	1.575997615711176e-16	2.0	0.08520045812110436	2
-0.05656565656565657	-0.1696969696969697	1.4926771917239205e-17	2.0	0.0850254862448742	2
-0.05656565656565657	-0.17373737373737375	3.477157793895553e-18	2.0	0.08485051436864403	2
-0.05656565656565657	-0.17777777777777778	1.666064440436583e-17	2.0	0.08467554249241388	2
-0.05656565656565657	-0.18181818181818182	5.989919188858094e-17	2.0	0.08450057061618371	2
-0.05656565656565657	-0.18585858585858586	1.601944200939492e-16	2.0	0.08432559873995356	2
-0.05656565656565657	-0.1898989898989899	4.619682142288383e-16	2.0	0.0841506268637234	2
-0.05656565656565657	-0.19393939393939394	1.215405968285445e-15	2.0	0.08397565498749324	2
-0.05656565656565657	-0.19797979797979798	2.3202858366975396e-14	2.0	0.08380068311126307	2
-0.05656565656565657	-0.20202020202020202	6.563230760998445e-14	2.0	0.08362571123503292	2
-0.05656565656565657	-0.20606060606060606	1.8338367383079232e-13	2.0	0.08345073935880275	2
-0.05656565656565657	-0.2101010101010101	3.3316595269962103e-13	2.0	0.0832757674825726	2
-0.05656565656565657	-0.21414141414141413	5.3285686737777984e-14	3.0	0.11871817179520304	2
-0.05656565656565657	-0.21818181818181817	7.729338569005874e-15	3.0	0.11854319991897289	2
-0.05656565656565657	-0.2222222222222222	8.119731290163104e-15	3.0	0.11836822804274273	2
-0.05656565656565657	-0.22626262626262628	5.921679052068547e-14	3.0	0.11819325616651256	2
-0.05656565656565657	-0.23030303030303031	8.792561538871475e-13	3.0	0.1180182842902824	2
-0.05656565656565657	-0.23434343434343435	3.419863976693388e-12	3.0	0.11784331241405224	2
-0.05656565656565657	-0.2383838383838384	1.073593948597662e-11	3.0	0.11766834053782207	2
-0.05656565656565657	-0.24242424242424243	3.3024662188127654e-11	3.0	0.11749336866159192	2
-0.05656565656565657	-0.24646464646464647	6.203978119943498e-10	3.0	0.11731839678536175	2
-0.05656565656565657	-0.2505050505050505	1.8174685953342788e-09	3.0	0.1171434249091316	2
-0.05656565656565657	-0.2545454545454545	4.2605942715553414e-10	4.0	0.15258582922176206	2
-0.05656565656565657	-0.2585858585858586	3.2060630277044004e-10	4.0	0.1524108573455319	2
-0.05656565656565657	-0.26262626262626265	1.4331204089006152e-10	4.0	0.15223588546930172	2
-0.05656565656565657	-0.26666666666666666	5.898674682502337e-11	4.0	0.15206091359307156	2
-0.05656565656565657	-0.27070707070707073	2.6518860938081044e-11	4.0	0.15188594171684142	2
-0.05656565656565657	-0.27474747474747474	1.251870135523705e-09	4.0	0.15171096984061125	2
-0.05656565656565657	-0.2787878787878788	5.8012666888214165e-08	4.0	0.15153599796438108	2
-0.05656565656565657	-0.2828282828282828	1.0423270167188573e-06	4.0	0.1513610260881509	2
-0.05656565656565657	-0.2868686868686869	1.39492125078622e-05	4.0	0.15118605421192077	2
-0.05656565656565657	-0.2909090909090909	1.468381675022261e-05	4.0	0.1510110823356906	2
-0.05656565656565657	-0.29494949494949496	6.7386611362739e-07	5.0	0.18645348664832107	2
-0.05656565656565657	-0.298989898989899	1.3775928197841495e-06	5.0	0.1862785147720909	2
-0.05656565656565657	-0.30303030303030304	1.2567779236788313e-06	5.0	0.18610354289586073	2
-0.05656565656565657	-0.30707070707070705	4.8601575063707413e-08	6.0	0.2215459472084912	2
-0.05656565656565657	-0.3111111111111111	1.3705310688404452e-09	6.0	0.22137097533226102	2
-0.05656565656565657	-0.3151515151515151	1.8247761201167082e-09	6.0	0.22119600345603088	2
-0.05656565656565657	-0.3191919191919192	2.431300406022812e-08	6.0	0.22102103157980071	2
-0.05656565656565657	-0.3232323232323232	7.09776050168605e-08	6.0	0.22084605970357055	2
-0.05656565656565657	-0.32727272727272727	9.590090280222572e-08	6.0	0.22067108782734038	2
-0.05656565656565657	-0.33131313131313134	7.422458008621461e-07	6.0	0.2204961159511102	2
-0.05656565656565657	-0.33535353535353535	5.749238883673445e-07	7.0	0.25593852026374064	2
-0.05656565656565657	-0.3393939393939394	1.1023624683153538e-07	7.0	0.2557635483875105	2
-0.05656565656565657	-0.3434343434343434	1.4959284749519758e-08	7.0	0.2555885765112803	2
-0.05656565656565657	-0.3474747474747475	1.3637924283985107e-09	1.0	0.041709347501886526	1
-0.05656565656565657	-0.3515151515151515	1.7844416632478388e-10	1.0	0.041534375625656365	1
-0.05656565656565657	-0.35555555555555557	7.690463654337271e-11	1.0	0.041359403749426205	1
-0.05656565656565657	-0.3595959595959596	3.3188424402322386e-11	1.0	0.041184431873196044	1
-0.05656565656565657	-0.36363636363636365	4.5391941622123505e-12	1.0	0.04100945999696588	1
-0.05656565656565657	-0.36767676767676766	1.87240368109652e-12	1.0	0.040834488120735715	1
-0.05656565656565657	-0.3717171717171717	7.730746948003406e-13	1.0	0.04065951624450556	1
-0.05656565656565657	-0.37575757575757573	3.194338049638614e-13	1.0	0.0404845443682754	1
-0.05656565656565657	-0.3797979797979798	4.80474687838448e-14	1.0	0.04030957249204524	1
-0.05656565656565657	-0.3838383838383838	3.109193825579498e-14	1.0	0.04013460061581507	1
-0.05656565656565657	-0.3878787878787879	3.905271537699137e-13	1.0	0.03995962873958492	1
-0.05656565656565657	-0.39191919191919194	7.388483159264192e-12	1.0	0.03978465686335475	1
-0.05656565656565657	-0.39595959595959596	2.140009078408722e-11	1.0	0.039609684987124597	1
-0.05656565656565657	-0.4	5.132497680306066e-11	1.0	0.03943471311089443	1
-0.06060606060606061	-0.0	2.3553672835937306e-16	0.0	0.0	0
-0.06060606060606061	-0.00404040404040404	3.20238990926897e-16	0.0	0.0	0
-0.06060606060606061	-0.00808080808080808	4.800109200073658e-16	0.0	0.0	0
-0.06060606060606061	-0.012121212121212121	6.752090831608177e-16	0.0	0.0	0
-0.06060606060606061	-0.01616161616161616	9.601451371553253e-16	0.0	0.0	0
-0.06060606060606061	-0.0202020202020202	1.3833173430111395e-15	0.0	0.0	0
-0.06060606060606061	-0.024242424242424242	2.0314799031211176e-15	0.0	0.0	0
-0.06060606060606061	-0.028282828282828285	2.944495415981688e-15	0.0	0.0	0
-0.06060606060606061	-0.03232323232323232	4.253998595026883e-15	0.0	0.0	0
-0.06060606060606061	-0.03636363636363636	6.57745438627855e-15	0.0	0.0	0
-0.06060606060606061	-0.0404040404040404	9.739425858223071e-15	0.0	0.0	0
-0.06060606060606061	-0.044444444444444446	1.4882917770312647e-14	0.0	0.0	0
-0.06060606060606061	-0.048484848484848485	2.3308192755625878e-14	0.0	0.0	0
-0.06060606060606061	-0.052525252525252523	3.7520751672735365e-14	0.0	0.0	0
-0.06060606060606061	-0.05656565656565657	7.164668096835149e-27	0.0	0.018666182091412204	1
-0.06060606060606061	-0.06060606060606061	1.881698659228859e-23	0.0	0.018491210215182043	2
-0.06060606060606061	-0.06464646464646465	2.673486794141731e-23	0.0	0.018316238338951882	2
-0.06060606060606061	-0.06868686868686869	1.0390140334011937e-22	0.0	0.01814126646272172	2
-0.06060606060606061	-0.07272727272727272	2.1279320635819806e-22	0.0	0.01796629458649156	2
-0.06060606060606061	-0.07676767676767676	4.3114284203523425e-22	0.0	0.0177913227102614	2
-0.06060606060606061	-0.0808080808080808	2.2386943789998766e-20	0.0	0.01761635083403124	2
-0.06060606060606061	-0.08484848484848485	2.242871121460804e-20	0.0	0.01744137895780108	2
-0.06060606060606061	-0.08888888888888889	7.246244921364696e-21	0.0	0.017266407081570918	2
-0.06060606060606061	-0.09292929292929293	4.5363265805104724e-20	0.0	0.017091435205340757	2
-0.06060606060606061	-0.09696969696969697	9.708206296805491e-20	0.0	0.016916463329110596	2
-0.06060606060606061	-0.10101010101010101	3.7681919382561696e-19	0.0	0.016741491452880435	2
-0.06060606060606061	-0.10505050505050505	7.854562273602521e-19	0.0	0.016566519576650274	2
-0.06060606060606061	-0.10909090909090909	4.359552272596587e-19	1.0	0.052008923889280724	2
-0.06060606060606061	-0.11313131313131314	5.322241734811589e-20	1.0	0.05183395201305056	2
-0.06060606060606061	-0.11717171717171718	8.046817404881838e-21	1.0	0.0516589801368204	2
-0.06060606060606061	-0.12121212121212122	3.9211990216355296e-21	1.0	0.05148400826059024	2
-0.06060606060606061	-0.12525252525252525	1.0420432295279527e-19	1.0	0.05130903638436008	2
-0.06060606060606061	-0.1292929292929293	1.253662245312406e-18	1.0	0.05113406450812992	2
-0.06060606060606061	-0.13333333333333333	3.626481181870572e-18	1.0	0.05095909263189976	2
-0.06060606060606061	-0.13737373737373737	9.596411536523925e-18	1.0	0.0507841207556696	2
-0.06060606060606061	-0.1414141414141414	2.4484156252987274e-17	1.0	0.05060914887943944	2
-0.06060606060606061	-0.14545454545454545	6.928429048880258e-17	1.0	0.05043417700320928	2
-0.06060606060606061	-0.1494949494949495	1.799730700007435e-16	1.0	0.050259205126979116	2
-0.06060606060606061	-0.15353535353535352	4.659077931403025e-16	1.0	0.050084233250748955	2
-0.06060606060606061	-0.15757575757575756	1.1724797839856879e-15	1.0	0.049909261374518794	2
-0.06060606060606061	-0.1616161616161616	2.5499025856304764e-15	1.0	0.049734289498288634	2
-0.06060606060606061	-0.16565656565656567	3.1093871606808323e-15	2.0	0.08517669381091907	2
-0.06060606060606061	-0.1696969696969697	3.457365792009552e-16	2.0	0.08500172193468891	2
-0.06060606060606061	-0.17373737373737375	7.325231055511221e-17	2.0	0.08482675005845874	2
-0.06060606060606061	-0.17777777777777778	1.3218564483885778e-16	2.0	0.08465177818222859	2
-0.06060606060606061	-0.18181818181818182	2.460941656459706e-15	2.0	0.08447680630599842	2
-0.06060606060606061	-0.18585858585858586	1.0135097173994524e-14	2.0	0.08430183442976827	2
-0.06060606060606061	-0.1898989898989899	2.0789431688263558e-13	2.0	0.08412686255353811	2
-0.06060606060606061	-0.19393939393939394	2.21309333358456e-12	2.0	0.08395189067730795	2
-0.06060606060606061	-0.19797979797979798	6.881182242621427e-12	2.0	0.08377691880107778	2
-0.06060606060606061	-0.20202020202020202	2.1315150480750563e-11	2.0	0.08360194692484763	2
-0.06060606060606061	-0.20606060606060606	6.309952531851077e-11	2.0	0.08342697504861746	2
-0.06060606060606061	-0.2101010101010101	6.796373075566623e-11	3.0	0.11886937936124792	2
-0.06060606060606061	-0.21414141414141413	7.024675446727265e-12	3.0	0.11869440748501775	2
-0.06060606060606061	-0.21818181818181817	1.3580899795991796e-12	3.0	0.1185194356087876	2
-0.06060606060606061	-0.2222222222222222	6.337826757452326e-13	3.0	0.11834446373255744	2
-0.06060606060606061	-0.22626262626262628	3.2629110036624895e-13	3.0	0.11816949185632727	2
-0.06060606060606061	-0.23030303030303031	1.518194829002092e-11	3.0	0.1179945199800971	2
-0.06060606060606061	-0.23434343434343435	5.279492427579169e-10	3.0	0.11781954810386694	2
-0.06060606060606061	-0.2383838383838384	4.102160855933011e-09	3.0	0.11764457622763679	2
-0.06060606060606061	-0.24242424242424243	1.492877292206401e-08	3.0	0.11746960435140663	2
-0.06060606060606061	-0.24646464646464647	1.9816175854202035e-07	3.0	0.11729463247517646	2
-0.06060606060606061	-0.2505050505050505	3.313385416060607e-07	4.0	0.1527370367878069	2
-0.06060606060606061	-0.2545454545454545	3.779776930149293e-08	4.0	0.15256206491157676	2
-0.06060606060606061	-0.2585858585858586	1.114669047447175e-08	4.0	0.1523870930353466	2
-0.06060606060606061	-0.26262626262626265	3.299170908561232e-09	4.0	0.15221212115911642	2
-0.06060606060606061	-0.26666666666666666	2.722703726565035e-10	4.0	0.15203714928288625	2
-0.06060606060606061	-0.27070707070707073	1.7529034758585253e-10	4.0	0.1518621774066561	2
-0.06060606060606061	-0.27474747474747474	4.766180225429424e-09	4.0	0.15168720553042594	2
-0.06060606060606061	-0.2787878787878788	1.8008959173872816e-07	4.0	0.15151223365419578	2
-0.06060606060606061	-0.2828282828282828	4.980542867222986e-06	5.0	0.18695463796682624	2
-0.06060606060606061	-0.2868686868686869	2.0431258093330566e-05	4.0	0.15116228990173547	2
-0.06060606060606061	-0.2909090909090909	4.471680195811146e-06	5.0	0.18660469421436593	2
-0.06060606060606061	-0.29494949494949496	1.4270382300121545e-05	5.0	0.18642972233813576	2
-0.06060606060606061	-0.298989898989899	1.5222488746385142e-05	5.0	0.1862547504619056	2
-0.06060606060606061	-0.30303030303030304	8.376817499654651e-07	6.0	0.22169715477453605	2
-0.06060606060606061	-0.30707070707070705	1.5837781645523557e-08	6.0	0.22152218289830589	2
-0.06060606060606061	-0.3111111111111111	3.357360861491622e-10	6.0	0.22134721102207572	2
-0.06060606060606061	-0.3151515151515151	1.597968789740249e-10	6.0	0.22117223914584558	2
-0.06060606060606061	-0.3191919191919192	5.463741238926851e-10	6.0	0.2209972672696154	2
-0.06060606060606061	-0.3232323232323232	2.3837692635601998e-09	6.0	0.22082229539338524	2
-0.06060606060606061	-0.32727272727272727	2.090231313428556e-09	6.0	0.22064732351715508	2
-0.06060606060606061	-0.33131313131313134	1.7087556439863394e-08	6.0	0.2204723516409249	2
-0.06060606060606061	-0.33535353535353535	1.0056412216328646e-08	7.0	0.25591475595355534	2
-0.06060606060606061	-0.3393939393939394	2.0360263928670228e-09	7.0	0.25573978407732517	2
-0.06060606060606061	-0.3434343434343434	1.3263695742536624e-10	7.0	0.25556481220109506	2
-0.06060606060606061	-0.3474747474747475	7.973647910060218e-12	1.0	0.041685583191701236	1
-0.06060606060606061	-0.3515151515151515	3.429227288200785e-12	1.0	0.041510611315471076	1
-0.06060606060606061	-0.35555555555555557	5.259714305808916e-13	1.0	0.041335639439240915	1
-0.06060606060606061	-0.3595959595959596	2.17438000188238e-13	1.0	0.041160667563010754	1
-0.06060606060606061	-0.36363636363636365	9.189829141225522e-14	1.0	0.04098569568678059	1
-0.06060606060606061	-0.36767676767676766	4.392548139369073e-14	1.0	0.040810723810550426	1
-0.06060606060606061	-0.3717171717171717	1.3926912357499711e-13	1.0	0.04063575193432027	1
-0.06060606060606061	-0.37575757575757573	3.7444117285851557e-13	1.0	0.04046078005809011	1
-0.06060606060606061	-0.3797979797979798	1.0321125529991152e-12	1.0	0.04028580818185995	1
-0.06060606060606061	-0.3838383838383838	1.7848497519297038e-11	1.0	0.04011083630562978	1
-0.06060606060606061	-0.3878787878787879	5.217792478342708e-11	1.0	0.03993586442939963	1
-0.06060606060606061	-0.39191919191919194	1.5216193493968657e-10	1.0	0.03976089255316946	1
-0.06060606060606061	-0.39595959595959596	2.4768604012528802e-09	1.0	0.03958592067693931	1
-0.06060606060606061	-0.4	7.44186855677613e-09	1.0	0.03941094880070914	1
-0.06464646464646465	-0.0	3.633122068032539e-16	0.0	0.0	0
-0.06464646464646465	-0.00404040404040404	5.026784080669673e-16	0.0	0.0	0
-0.06464646464646465	-0.00808080808080808	7.799084206025277e-16	0.0	0.0	0
-0.06464646464646465	-0.012121212121212121	1.0683974358659889e-15	0.0	0.0	0
-0.06464646464646465	-0.01616161616161616	1.4996194980211627e-15	0.0	0.0	0
-0.06464646464646465	-0.0202020202020202	2.286506927751811e-15	0.0	0.0	0
-0.06464646464646465	-0.024242424242424242	3.3152260435468637e-15	0.0	0.0	0
-0.06464646464646465	-0.028282828282828285	4.514976094417966e-28	0.0	0.01986722091483804	1
-0.06464646464646465	-0.03232323232323232	5.559205769159115e-28	0.0	0.01969224903860788	1
-0.06464646464646465	-0.03636363636363636	8.530085106097789e-28	0.0	0.01951727716237772	1
-0.06464646464646465	-0.0404040404040404	2.0857873208425917e-27	0.0	0.019342305286147558	1
-0.06464646464646465	-0.044444444444444446	4.843598415515143e-27	0.0	0.019167333409917397	1
-0.06464646464646465	-0.048484848484848485	1.2346391714866979e-26	0.0	0.018992361533687236	1
-0.06464646464646465	-0.052525252525252523	3.3036715433908844e-26	0.0	0.018817389657457075	1
-0.06464646464646465	-0.05656565656565657	8.352290841532629e-26	0.0	0.018642417781226914	1
-0.06464646464646465	-0.06060606060606061	3.452403890978761e-21	0.0	0.018467445904996754	2
-0.06464646464646465	-0.06464646464646465	-6.3182952447326975e-21	0.0	0.018292474028766593	2
-0.06464646464646465	-0.06868686868686869	3.730388873697986e-21	0.0	0.018117502152536432	2
-0.06464646464646465	-0.07272727272727272	2.8942072183918123e-21	0.0	0.01794253027630627	2
-0.06464646464646465	-0.07676767676767676	2.1076511160288946e-20	0.0	0.01776755840007611	2
-0.06464646464646465	-0.0808080808080808	5.706442826024436e-20	0.0	0.01759258652384595	2
-0.06464646464646465	-0.08484848484848485	1.5184562867669777e-19	0.0	0.01741761464761579	2
-0.06464646464646465	-0.08888888888888889	3.5998542237214234e-19	0.0	0.017242642771385628	2
-0.06464646464646465	-0.09292929292929293	1.1890968403943626e-18	0.0	0.017067670895155467	2
-0.06464646464646465	-0.09696969696969697	3.487709450084499e-18	0.0	0.016892699018925306	2
-0.06464646464646465	-0.10101010101010101	9.899601867874987e-18	0.0	0.016717727142695146	2
-0.06464646464646465	-0.10505050505050505	2.1816696846052912e-17	0.0	0.016542755266464985	2
-0.06464646464646465	-0.10909090909090909	7.560170510420118e-18	1.0	0.051985159579095434	2
-0.06464646464646465	-0.11313131313131314	3.816519937042665e-18	1.0	0.051810187702865274	2
-0.06464646464646465	-0.11717171717171718	6.269191631728823e-19	1.0	0.05163521582663511	2
-0.06464646464646465	-0.12121212121212122	8.050844194867062e-20	1.0	0.05146024395040495	2
-0.06464646464646465	-0.12525252525252525	8.969264733914788e-19	1.0	0.05128527207417479	2
-0.06464646464646465	-0.1292929292929293	3.219009785614551e-17	1.0	0.05111030019794463	2
-0.06464646464646465	-0.13333333333333333	4.602266272396371e-16	1.0	0.05093532832171447	2
-0.06464646464646465	-0.13737373737373737	1.5970784313003678e-15	1.0	0.05076035644548431	2
-0.06464646464646465	-0.1414141414141414	5.0921495846119205e-15	1.0	0.05058538456925415	2
-0.06464646464646465	-0.14545454545454545	1.4860958747407808e-14	1.0	0.05041041269302399	2
-0.06464646464646465	-0.1494949494949495	4.275117542298878e-14	1.0	0.050235440816793826	2
-0.06464646464646465	-0.15353535353535352	1.2166079883733488e-13	1.0	0.050060468940563665	2
-0.06464646464646465	-0.15757575757575756	3.31893878151372e-13	1.0	0.049885497064333505	2
-0.06464646464646465	-0.1616161616161616	5.664100379712477e-13	1.0	0.049710525188103344	2
-0.06464646464646465	-0.16565656565656567	8.264649191610148e-14	2.0	0.08515292950073378	2
-0.06464646464646465	-0.1696969696969697	3.8512176642094953e-14	2.0	0.08497795762450362	2
-0.06464646464646465	-0.17373737373737375	6.4546522655556875e-15	2.0	0.08480298574827345	2
-0.06464646464646465	-0.17777777777777778	1.0004201158488538e-15	2.0	0.0846280138720433	2
-0.06464646464646465	-0.18181818181818182	2.231934469728315e-14	2.0	0.08445304199581313	2
-0.06464646464646465	-0.18585858585858586	1.7032453945844566e-12	2.0	0.08427807011958298	2
-0.06464646464646465	-0.1898989898989899	1.1062075828862915e-11	2.0	0.08410309824335283	2
-0.06464646464646465	-0.19393939393939394	3.588391827098826e-11	2.0	0.08392812636712266	2
-0.06464646464646465	-0.19797979797979798	3.500456445148714e-10	2.0	0.08375315449089249	2
-0.06464646464646465	-0.20202020202020202	1.1411243695888942e-09	2.0	0.08357818261466234	2
-0.06464646464646465	-0.20606060606060606	2.847248995102124e-09	2.0	0.08340321073843217	2
-0.06464646464646465	-0.2101010101010101	1.3316700377903946e-09	3.0	0.11884561505106261	2
-0.06464646464646465	-0.21414141414141413	9.68945838923175e-11	3.0	0.11867064317483245	2
-0.06464646464646465	-0.21818181818181817	3.344396853420817e-11	3.0	0.1184956712986023	2
-0.06464646464646465	-0.2222222222222222	3.0533533322654585e-12	3.0	0.11832069942237214	2
-0.06464646464646465	-0.22626262626262628	1.854584353507859e-12	3.0	0.11814572754614197	2
-0.06464646464646465	-0.23030303030303031	6.245654083473193e-11	3.0	0.1179707556699118	2
-0.06464646464646465	-0.23434343434343435	3.2647591657897715e-09	3.0	0.11779578379368164	2
-0.06464646464646465	-0.2383838383838384	1.032150982924348e-07	3.0	0.1176208119174515	2
-0.06464646464646465	-0.24242424242424243	7.931784072862988e-07	3.0	0.11744584004122133	2
-0.06464646464646465	-0.24646464646464647	1.1276819605206573e-05	3.0	0.11727086816499116	2
-0.06464646464646465	-0.2505050505050505	4.120547430927163e-06	4.0	0.1527132724776216	2
-0.06464646464646465	-0.2545454545454545	8.213771117295863e-07	4.0	0.15253830060139145	2
-0.06464646464646465	-0.2585858585858586	1.215511615940521e-06	4.0	0.15236332872516128	2
-0.06464646464646465	-0.26262626262626265	1.508199456464091e-07	4.0	0.15218835684893112	2
-0.06464646464646465	-0.26666666666666666	8.319951186620462e-09	4.0	0.15201338497270095	2
-0.06464646464646465	-0.27070707070707073	4.1144665920534276e-10	5.0	0.1874557892853314	2
-0.06464646464646465	-0.27474747474747474	7.736323983787785e-10	5.0	0.18728081740910124	2
-0.06464646464646465	-0.2787878787878788	1.0537105700965418e-08	5.0	0.18710584553287107	2
-0.06464646464646465	-0.2828282828282828	1.685628999840909e-07	5.0	0.18693087365664093	2
-0.06464646464646465	-0.2868686868686869	4.356627751973294e-07	5.0	0.1867559017804108	2
-0.06464646464646465	-0.2909090909090909	2.9359269731510205e-06	5.0	0.18658092990418063	2
-0.06464646464646465	-0.29494949494949496	4.27784986023054e-06	6.0	0.22202333421681106	2
-0.06464646464646465	-0.298989898989899	1.213412020266949e-06	6.0	0.2218483623405809	2
-0.06464646464646465	-0.30303030303030304	1.0966994332147641e-07	6.0	0.22167339046435075	2
-0.06464646464646465	-0.30707070707070705	2.938382561642612e-09	6.0	0.22149841858812058	2
-0.06464646464646465	-0.3111111111111111	6.245758165605154e-11	6.0	0.22132344671189041	2
-0.06464646464646465	-0.3151515151515151	5.503729166784998e-12	6.0	0.22114847483566027	2
-0.06464646464646465	-0.3191919191919192	4.4895570054002645e-11	6.0	0.2209735029594301	2
-0.06464646464646465	-0.3232323232323232	6.364072437964509e-11	6.0	0.22079853108319994	2
-0.06464646464646465	-0.32727272727272727	4.0990406308100965e-10	6.0	0.22062355920696977	2
-0.06464646464646465	-0.33131313131313134	8.384823648759022e-10	7.0	0.2560659635196002	2
-0.06464646464646465	-0.33535353535353535	1.8434506125474451e-10	7.0	0.25589099164337004	2
-0.06464646464646465	-0.3393939393939394	3.5191715742166845e-11	7.0	0.25571601976713987	2
-0.06464646464646465	-0.3434343434343434	6.660996187857265e-12	7.0	0.25554104789090976	2
-0.06464646464646465	-0.3474747474747475	2.224764895911397e-13	1.0	0.04166181888151595	1
-0.06464646464646465	-0.3515151515151515	9.535879075737955e-14	1.0	0.041486847005285786	1
-0.06464646464646465	-0.35555555555555557	4.7708272644461344e-14	1.0	0.041311875129055625	1
-0.06464646464646465	-0.3595959595959596	3.42714297067896e-14	1.0	0.041136903252825464	1
-0.06464646464646465	-0.36363636363636365	3.5828820998389556e-13	1.0	0.040961931376595304	1
-0.06464646464646465	-0.36767676767676766	9.833448012497908e-13	1.0	0.040786959500365136	1
-0.06464646464646465	-0.3717171717171717	2.70282417023981e-12	1.0	0.04061198762413498	1
-0.06464646464646465	-0.37575757575757573	7.404113629347901e-12	1.0	0.04043701574790482	1
-0.06464646464646465	-0.3797979797979798	1.217489170252096e-10	1.0	0.04026204387167466	1
-0.06464646464646465	-0.3838383838383838	3.5172612130449936e-10	1.0	0.04008707199544449	1
-0.06464646464646465	-0.3878787878787879	1.011243533978237e-09	1.0	0.03991210011921434	1
-0.06464646464646465	-0.39191919191919194	1.5618658281829596e-08	1.0	0.03973712824298417	1
-0.06464646464646465	-0.39595959595959596	4.726603666377858e-08	1.0	0.03956215636675402	1
-0.06464646464646465	-0.4	1.4203276489985157e-07	1.0	0.03938718449052385	1
-0.06868686868686869	-0.0	4.742853001181155e-29	0.0	0.021068259738263873	1
-0.06868686868686869	-0.00404040404040404	5.250791587637968e-29	0.0	0.020893287862033712	1
-0.06868686868686869	-0.00808080808080808	7.834712288131652e-29	0.0	0.02071831598580355	1
-0.06868686868686869	-0.012121212121212121	1.1791876215061957e-28	0.0	0.02054334410957339	1
-0.06868686868686869	-0.01616161616161616	2.2501100123060363e-28	0.0	0.02036837223334323	1
-0.06868686868686869	-0.0202020202020202	4.745638785024666e-28	0.0	0.02019340035711307	1
-0.06868686868686869	-0.024242424242424242	1.102058077358826e-27	0.0	0.020018428480882908	1
-0.06868686868686869	-0.028282828282828285	2.551388458191008e-27	0.0	0.019843456604652747	1
-0.06868686868686869	-0.03232323232323232	4.7407620728217514e-26	0.0	0.019668484728422586	1
-0.06868686868686869	-0.03636363636363636	1.2437274090881441e-25	0.0	0.019493512852192425	1
-0.06868686868686869	-0.0404040404040404	2.932701573937341e-25	0.0	0.019318540975962264	1
-0.06868686868686869	-0.044444444444444446	7.500597123244205e-25	0.0	0.019143569099732104	1
-0.06868686868686869	-0.048484848484848485	2.019688270216363e-24	0.0	0.018968597223501943	1
-0.06868686868686869	-0.052525252525252523	5.894971334747538e-24	0.0	0.018793625347271782	1
-0.06868686868686869	-0.05656565656565657	1.5837949824588627e-23	0.0	0.01861865347104162	1
-0.06868686868686869	-0.06060606060606061	-3.558147767374544e-21	0.0	0.01844368159481146	2
-0.06868686868686869	-0.06464646464646465	1.8377284951878036e-20	0.0	0.0182687097185813	2
-0.06868686868686869	-0.06868686868686869	8.013682792682199e-20	0.0	0.01809373784235114	2
-0.06868686868686869	-0.07272727272727272	7.566376678862018e-19	0.0	0.017918765966120978	2
-0.06868686868686869	-0.07676767676767676	2.012832165669062e-18	0.0	0.017743794089890817	2
-0.06868686868686869	-0.0808080808080808	5.74184995550121e-18	0.0	0.017568822213660656	2
-0.06868686868686869	-0.08484848484848485	1.5911253855658774e-17	0.0	0.017393850337430496	2
-0.06868686868686869	-0.08888888888888889	4.393382497157158e-17	0.0	0.017218878461200335	2
-0.06868686868686869	-0.09292929292929293	1.162078744049859e-16	0.0	0.017043906584970174	2
-0.06868686868686869	-0.09696969696969697	3.720312145023339e-16	0.0	0.016868934708740013	2
-0.06868686868686869	-0.10101010101010101	1.0743253887534563e-15	0.0	0.016693962832509852	2
-0.06868686868686869	-0.10505050505050505	1.988658745347587e-15	0.0	0.01651899095627969	2
-0.06868686868686869	-0.10909090909090909	4.45866039194114e-16	1.0	0.051961395268910145	2
-0.06868686868686869	-0.11313131313131314	6.615409871358986e-17	1.0	0.051786423392679984	2
-0.06868686868686869	-0.11717171717171718	1.0962784315049309e-17	1.0	0.05161145151644982	2
-0.06868686868686869	-0.12121212121212122	1.089346350968776e-18	1.0	0.05143647964021966	2
-0.06868686868686869	-0.12525252525252525	2.7224195770456803e-18	1.0	0.0512615077639895	2
-0.06868686868686869	-0.1292929292929293	1.4232001675669087e-16	1.0	0.05108653588775934	2
-0.06868686868686869	-0.13333333333333333	4.226187465049465e-15	1.0	0.05091156401152918	2
-0.06868686868686869	-0.13737373737373737	2.407348348153173e-14	1.0	0.05073659213529902	2
-0.06868686868686869	-0.1414141414141414	1.654017930317725e-13	1.0	0.05056162025906886	2
-0.06868686868686869	-0.14545454545454545	5.147839184223243e-13	1.0	0.0503866483828387	2
-0.06868686868686869	-0.1494949494949495	1.579844870053824e-12	1.0	0.05021167650660854	2
-0.06868686868686869	-0.15353535353535352	4.774854763638182e-12	1.0	0.050036704630378376	2
-0.06868686868686869	-0.15757575757575756	1.3756154460718735e-11	1.0	0.049861732754148215	2
-0.06868686868686869	-0.1616161616161616	1.3273584313982807e-11	2.0	0.08530413706677865	2
-0.06868686868686869	-0.16565656565656567	1.4416518007573378e-12	2.0	0.08512916519054849	2
-0.06868686868686869	-0.1696969696969697	9.854276614174874e-13	2.0	0.08495419331431833	2
-0.06868686868686869	-0.17373737373737375	1.1412509623157095e-13	2.0	0.08477922143808816	2
-0.06868686868686869	-0.17777777777777778	2.5134550768632332e-14	2.0	0.08460424956185801	2
-0.06868686868686869	-0.18181818181818182	8.00746790552196e-14	2.0	0.08442927768562784	2
-0.06868686868686869	-0.18585858585858586	1.1191026956613814e-11	2.0	0.08425430580939769	2
-0.06868686868686869	-0.1898989898989899	4.906400636415294e-10	2.0	0.08407933393316754	2
-0.06868686868686869	-0.19393939393939394	5.754842296838722e-09	2.0	0.08390436205693737	2
-0.06868686868686869	-0.19797979797979798	2.2366652593874254e-08	2.0	0.0837293901807072	2
-0.06868686868686869	-0.20202020202020202	7.345564184446684e-08	2.0	0.08355441830447705	2
-0.06868686868686869	-0.20606060606060606	3.9325719475467105e-07	2.0	0.08337944642824688	2
-0.06868686868686869	-0.2101010101010101	7.74124129166867e-08	3.0	0.11882185074087734	2
-0.06868686868686869	-0.21414141414141413	9.583857595777214e-09	3.0	0.11864687886464717	2
-0.06868686868686869	-0.21818181818181817	1.895828997764227e-09	3.0	0.11847190698841702	2
-0.06868686868686869	-0.2222222222222222	1.621904139179257e-10	3.0	0.11829693511218686	2
-0.06868686868686869	-0.22626262626262628	1.726495038263926e-11	3.0	0.1181219632359567	2
-0.06868686868686869	-0.23030303030303031	2.3841056320768944e-10	3.0	0.11794699135972653	2
-0.06868686868686869	-0.23434343434343435	1.152357683557675e-08	3.0	0.11777201948349636	2
-0.06868686868686869	-0.2383838383838384	3.753458314409921e-07	3.0	0.1175970476072662	2
-0.06868686868686869	-0.24242424242424243	7.6173987365548055e-06	4.0	0.15284940475501027	2
-0.06868686868686869	-0.24646464646464647	2.12431105026618e-05	4.0	0.1526744328787801	2
-0.06868686868686869	-0.2505050505050505	4.720912272478502e-06	4.0	0.15268950816743632	2
-0.06868686868686869	-0.2545454545454545	1.0192129168370153e-05	4.0	0.15251453629120618	2
-0.06868686868686869	-0.2585858585858586	5.041915215653097e-06	4.0	0.152339564414976	2
-0.06868686868686869	-0.26262626262626265	2.182502666005903e-07	5.0	0.18759192156272006	2
-0.06868686868686869	-0.26666666666666666	4.89691515381809e-09	5.0	0.1874169496864899	2
-0.06868686868686869	-0.27070707070707073	1.1758243179261517e-10	5.0	0.18724197781025975	2
-0.06868686868686869	-0.27474747474747474	1.6208831004567888e-10	5.0	0.18706700593402958	2
-0.06868686868686869	-0.2787878787878788	2.0882260341983273e-09	5.0	0.18689203405779942	2
-0.06868686868686869	-0.2828282828282828	1.7889491403820648e-08	5.0	0.18671706218156925	2
-0.06868686868686869	-0.2868686868686869	3.166980251243638e-08	5.0	0.1867321374702255	2
-0.06868686868686869	-0.2909090909090909	2.9356259746381633e-07	5.0	0.18655716559399532	2
-0.06868686868686869	-0.29494949494949496	3.6410738837934074e-07	6.0	0.22199956990662578	2
-0.06868686868686869	-0.298989898989899	7.474686808115449e-08	6.0	0.22182459803039561	2
-0.06868686868686869	-0.30303030303030304	5.600045265899829e-09	6.0	0.22164962615416547	2
-0.06868686868686869	-0.30707070707070705	4.6429188060378566e-10	6.0	0.2214746542779353	2
-0.06868686868686869	-0.3111111111111111	1.3017507323253148e-11	6.0	0.22129968240170514	2
-0.06868686868686869	-0.3151515151515151	1.140423327114935e-12	6.0	0.221124710525475	2
-0.06868686868686869	-0.3191919191919192	6.075970588878588e-12	6.0	0.22094973864924483	2
-0.06868686868686869	-0.3232323232323232	2.750783217909745e-12	6.0	0.22077476677301466	2
-0.06868686868686869	-0.32727272727272727	8.23861004735155e-11	6.0	0.2205997948967845	2
-0.06868686868686869	-0.33131313131313134	4.6592380069679105e-11	7.0	0.25604219920941496	2
-0.06868686868686869	-0.33535353535353535	9.071570971093687e-12	7.0	0.2558672273331848	2
-0.06868686868686869	-0.3393939393939394	2.7254713655353645e-13	7.0	0.2556922554569546	2
-0.06868686868686869	-0.3434343434343434	1.127271954623512e-13	7.0	0.25551728358072445	2
-0.06868686868686869	-0.3474747474747475	2.2338540905884118e-13	1.0	0.04163805457133066	1
-0.06868686868686869	-0.3515151515151515	5.869224898922852e-13	1.0	0.041463082695100496	1
-0.06868686868686869	-0.35555555555555557	8.40472141611955e-12	1.0	0.041288110818870336	1
-0.06868686868686869	-0.3595959595959596	2.3677271149807948e-11	1.0	0.041113138942640175	1
-0.06868686868686869	-0.36363636363636365	6.626501258434985e-11	1.0	0.040938167066410014	1
-0.06868686868686869	-0.36767676767676766	1.5574012892169036e-10	1.0	0.040763195190179846	1
-0.06868686868686869	-0.3717171717171717	2.1817239942966916e-09	1.0	0.04058822331394969	1
-0.06868686868686869	-0.37575757575757573	6.414052390620897e-09	1.0	0.04041325143771953	1
-0.06868686868686869	-0.3797979797979798	1.8737677836772955e-08	1.0	0.04023827956148937	1
-0.06868686868686869	-0.3838383838383838	2.456006855053286e-07	1.0	0.0400633076852592	1
-0.06868686868686869	-0.3878787878787879	7.439206836462822e-07	1.0	0.03988833580902905	1
-0.06868686868686869	-0.39191919191919194	2.179729719194787e-06	1.0	0.03971336393279888	1
-0.06868686868686869	-0.39595959595959596	5.717723603822479e-06	1.0	0.03953839205656873	1
-0.06868686868686869	-0.4	2.631276723297066e-07	0.0	0.0	0
-0.07272727272727272	-0.0	1.3771392724821347e-28	0.0	0.021044495428078583	1
-0.07272727272727272	-0.00404040404040404	2.9415255524438077e-27	0.0	0.020869523551848422	1
-0.07272727272727272	-0.00808080808080808	7.082160244594532e-27	0.0	0.02069455167561826	1
-0.07272727272727272	-0.012121212121212121	1.6634173721975795e-26	0.0	0.0205195797993881	1
-0.07272727272727272	-0.01616161616161616	3.763369969345305e-26	0.0	0.02034460792315794	1
-0.07272727272727272	-0.0202020202020202	8.109120742175628e-26	0.0	0.02016963604692778	1
-0.07272727272727272	-0.024242424242424242	1.9311343609221998e-25	0.0	0.019994664170697618	1
-0.07272727272727272	-0.028282828282828285	4.42295026692419e-25	0.0	0.019819692294467457	1
-0.07272727272727272	-0.03232323232323232	1.0623007970955225e-24	0.0	0.019644720418237296	1
-0.07272727272727272	-0.03636363636363636	2.818165833983941e-24	0.0	0.019469748542007136	1
-0.07272727272727272	-0.0404040404040404	2.100316322259996e-23	0.0	0.019294776665776975	1
-0.07272727272727272	-0.044444444444444446	5.761196986826587e-23	0.0	0.019119804789546814	1
-0.07272727272727272	-0.048484848484848485	1.57141287601233e-22	0.0	0.018944832913316653	1
-0.07272727272727272	-0.052525252525252523	4.759345373308117e-22	0.0	0.018769861037086492	1
-0.07272727272727272	-0.05656565656565657	2.5977530425435182e-21	0.0	0.01859488916085633	2
-0.07272727272727272	-0.06060606060606061	4.973774559907588e-21	0.0	0.01841991728462617	2
-0.07272727272727272	-0.06464646464646465	3.0279932379066953e-19	0.0	0.01824494540839601	2
-0.07272727272727272	-0.06868686868686869	4.3449518449577106e-18	0.0	0.01806997353216585	2
-0.07272727272727272	-0.07272727272727272	2.3054743689969595e-17	0.0	0.01789500165593569	2
-0.07272727272727272	-0.07676767676767676	5.841629568866786e-17	0.0	0.017720029779705528	2
-0.07272727272727272	-0.0808080808080808	1.5666452781858405e-16	0.0	0.017545057903475367	2
-0.07272727272727272	-0.08484848484848485	4.2311781541312223e-16	0.0	0.017370086027245206	2
-0.07272727272727272	-0.08888888888888889	2.63554255477371e-15	0.0	0.017195114151015045	2
-0.07272727272727272	-0.09292929292929293	7.976215127148624e-15	0.0	0.017020142274784884	2
-0.07272727272727272	-0.09696969696969697	2.3575748781363007e-14	0.0	0.016845170398554724	2
-0.07272727272727272	-0.10101010101010101	6.598649928062834e-14	0.0	0.016670198522324563	2
-0.07272727272727272	-0.10505050505050505	7.027620773032561e-14	1.0	0.05211260283495501	2
-0.07272727272727272	-0.10909090909090909	1.1491429790723931e-14	1.0	0.05193763095872485	2
-0.07272727272727272	-0.11313131313131314	2.289178261514072e-15	1.0	0.05176265908249469	2
-0.07272727272727272	-0.11717171717171718	3.568025485155635e-16	1.0	0.051587687206264526	2
-0.07272727272727272	-0.12121212121212122	3.64251441556331e-17	1.0	0.051412715330034366	2
-0.07272727272727272	-0.12525252525252525	1.2009747474497924e-17	1.0	0.051237743453804205	2
-0.07272727272727272	-0.1292929292929293	4.317417242700237e-16	1.0	0.051062771577574044	2
-0.07272727272727272	-0.13333333333333333	1.9998862938824218e-14	1.0	0.05088779970134388	2
-0.07272727272727272	-0.13737373737373737	1.2439652438686597e-12	1.0	0.05071282782511372	2
-0.07272727272727272	-0.1414141414141414	1.008939984162291e-11	1.0	0.05053785594888356	2
-0.07272727272727272	-0.14545454545454545	3.2907120074695564e-11	1.0	0.0503628840726534	2
-0.07272727272727272	-0.1494949494949495	9.867480349107431e-11	1.0	0.05018791219642324	2
-0.07272727272727272	-0.15353535353535352	5.427051878157706e-10	1.0	0.05001294032019308	2
-0.07272727272727272	-0.15757575757575756	1.6230580657921596e-09	1.0	0.04983796844396292	2
-0.07272727272727272	-0.1616161616161616	6.855784151167659e-10	2.0	0.08528037275659336	2
-0.07272727272727272	-0.16565656565656567	7.895148272283874e-11	2.0	0.0851054008803632	2
-0.07272727272727272	-0.1696969696969697	1.8329795480564297e-11	2.0	0.08493042900413304	2
-0.07272727272727272	-0.17373737373737375	1.833667430104509e-12	2.0	0.08475545712790288	2
-0.07272727272727272	-0.17777777777777778	1.621316238379647e-13	2.0	0.08458048525167272	2
-0.07272727272727272	-0.18181818181818182	6.632218991232536e-13	2.0	0.08440551337544255	2
-0.07272727272727272	-0.18585858585858586	3.7988757018595204e-11	2.0	0.0842305414992124	2
-0.07272727272727272	-0.1898989898989899	2.2886824795601586e-09	2.0	0.08405556962298225	2
-0.07272727272727272	-0.19393939393939394	9.123358779161251e-08	2.0	0.08388059774675208	2
-0.07272727272727272	-0.19797979797979798	8.763571734627616e-07	2.0	0.08370562587052191	2
-0.07272727272727272	-0.20202020202020202	3.1723761448537437e-06	2.0	0.08353065399429176	2
-0.07272727272727272	-0.20606060606060606	3.702742857934239e-06	3.0	0.1189730583069222	2
-0.07272727272727272	-0.2101010101010101	1.9731457201409026e-07	3.0	0.11879808643069203	2
-0.07272727272727272	-0.21414141414141413	8.82616115029795e-08	3.0	0.11862311455446187	2
-0.07272727272727272	-0.21818181818181817	2.3933571614990128e-08	3.0	0.11844814267823173	2
-0.07272727272727272	-0.2222222222222222	1.978754990194265e-09	3.0	0.11827317080200156	2
-0.07272727272727272	-0.22626262626262628	1.4793621285744764e-10	3.0	0.11809819892577139	2
-0.07272727272727272	-0.23030303030303031	4.2491864604111866e-10	4.0	0.15335055607351544	2
-0.07272727272727272	-0.23434343434343435	8.698222149033092e-09	4.0	0.15317558419728527	2
-0.07272727272727272	-0.2383838383838384	1.3901243076126395e-07	4.0	0.15300061232105513	2
-0.07272727272727272	-0.24242424242424243	3.839146753302119e-06	4.0	0.15282564044482497	2
-0.07272727272727272	-0.24646464646464647	2.2942069035089585e-06	4.0	0.1526506685685948	2
-0.07272727272727272	-0.2505050505050505	1.590000092286484e-05	4.0	0.15247569669236466	2
-0.07272727272727272	-0.2545454545454545	2.4627611022496976e-05	4.0	0.15249077198102087	2
-0.07272727272727272	-0.2585858585858586	1.897911687916264e-06	5.0	0.18774312912876492	2
-0.07272727272727272	-0.26262626262626265	5.3290121815205914e-08	5.0	0.18756815725253476	2
-0.07272727272727272	-0.26666666666666666	1.1063933076637303e-09	5.0	0.1873931853763046	2
-0.07272727272727272	-0.27070707070707073	2.2015046807335408e-11	5.0	0.18721821350007445	2
-0.07272727272727272	-0.27474747474747474	6.173345435453297e-12	5.0	0.18704324162384428	2
-0.07272727272727272	-0.2787878787878788	1.8530509736985914e-10	5.0	0.1868682697476141	2
-0.07272727272727272	-0.2828282828282828	5.724668936802032e-10	5.0	0.18669329787138395	2
-0.07272727272727272	-0.2868686868686869	2.45122403839503e-09	5.0	0.1865183259951538	2
-0.07272727272727272	-0.2909090909090909	1.578977699198746e-08	6.0	0.22196073030778424	2
-0.07272727272727272	-0.29494949494949496	2.944688576456892e-09	6.0	0.22178575843155407	2
-0.07272727272727272	-0.298989898989899	6.280236181653701e-10	6.0	0.2218008337202103	2
-0.07272727272727272	-0.30303030303030304	1.3007856593223712e-10	6.0	0.22162586184398017	2
-0.07272727272727272	-0.30707070707070705	2.286648471138784e-11	6.0	0.22145088996775	2
-0.07272727272727272	-0.3111111111111111	1.670739193303067e-12	6.0	0.22127591809151984	2
-0.07272727272727272	-0.3151515151515151	6.793655754799484e-14	6.0	0.2211009462152897	2
-0.07272727272727272	-0.3191919191919192	9.208119766367353e-14	6.0	0.22092597433905953	2
-0.07272727272727272	-0.3232323232323232	5.159959380023447e-13	6.0	0.22075100246282936	2
-0.07272727272727272	-0.32727272727272727	2.9650013614785317e-12	7.0	0.25619340677545976	2
-0.07272727272727272	-0.33131313131313134	4.198401419338767e-13	7.0	0.2560184348992296	2
-0.07272727272727272	-0.33535353535353535	1.1111142738300844e-13	7.0	0.2558434630229995	2
-0.07272727272727272	-0.3393939393939394	2.875785507561545e-13	7.0	0.2556684911467693	2
-0.07272727272727272	-0.3434343434343434	1.84508098743248e-12	1.0	0.04178926213737552	1
-0.07272727272727272	-0.3474747474747475	2.4262789958248414e-11	1.0	0.04161429026114536	1
-0.07272727272727272	-0.3515151515151515	6.923260405116396e-11	1.0	0.0414393183849152	1
-0.07272727272727272	-0.35555555555555557	1.92702856399793e-10	1.0	0.04126434650868504	1
-0.07272727272727272	-0.3595959595959596	5.354722035685675e-10	1.0	0.04108937463245488	1
-0.07272727272727272	-0.36363636363636365	6.774290767510358e-09	1.0	0.04091440275622472	1
-0.07272727272727272	-0.36767676767676766	1.9845429352742796e-08	1.0	0.04073943087999455	1
-0.07272727272727272	-0.3717171717171717	5.788484626041376e-08	1.0	0.040564459003764396	1
-0.07272727272727272	-0.37575757575757573	1.6746457825653878e-07	1.0	0.040389487127534235	1
-0.07272727272727272	-0.3797979797979798	1.7030516737936493e-06	1.0	0.040214515251304074	1
-0.07272727272727272	-0.3838383838383838	4.66705661333872e-06	1.0	0.040039543375073906	1
-0.07272727272727272	-0.3878787878787879	1.070926134055733e-05	1.0	0.03986457149884375	1
-0.07272727272727272	-0.39191919191919194	2.71159753696764e-07	0.0	0.0	0
-0.07272727272727272	-0.39595959595959596	2.735464645555773e-07	0.0	0.0	0
-0.07272727272727272	-0.4	2.762489326051778e-07	0.0	0.0	0
-0.07676767676767676	-0.0	2.5712782405562884e-26	0.0	0.021020731117893293	1
-0.07676767676767676	-0.00404040404040404	5.944791412953832e-26	0.0	0.020845759241663132	1
-0.07676767676767676	-0.00808080808080808	1.324369232985107e-25	0.0	0.02067078736543297	1
-0.07676767676767676	-0.012121212121212121	3.05799071299257e-25	0.0	0.02049581548920281	1
-0.07676767676767676	-0.01616161616161616	2.4084422649476138e-24	0.0	0.02032084361297265	1
-0.07676767676767676	-0.0202020202020202	6.227110313444942e-24	0.0	0.02014587173674249	1
-0.07676767676767676	-0.024242424242424242	1.604612376785605e-23	0.0	0.01997089986051233	1
-0.07676767676767676	-0.028282828282828285	3.543694913620968e-23	0.0	0.019795927984282168	1
-0.07676767676767676	-0.03232323232323232	8.66617569537375e-23	0.0	0.019620956108052007	1
-0.07676767676767676	-0.03636363636363636	2.3516796451668243e-22	0.0	0.019445984231821846	1
-0.07676767676767676	-0.0404040404040404	6.138829531629369e-22	0.0	0.019271012355591685	1
-0.07676767676767676	-0.044444444444444446	1.6678205707867875e-21	0.0	0.019096040479361524	1
-0.07676767676767676	-0.048484848484848485	4.6394304450176536e-21	0.0	0.018921068603131364	1
-0.07676767676767676	-0.052525252525252523	1.390627084038471e-20	0.0	0.018746096726901203	1
-0.07676767676767676	-0.05656565656565657	1.4278531506331597e-20	0.0	0.018571124850671042	2
-0.07676767676767676	-0.06060606060606061	6.850988419787284e-21	0.0	0.01839615297444088	2
-0.07676767676767676	-0.06464646464646465	6.964494586492142e-19	0.0	0.01822118109821072	2
-0.07676767676767676	-0.06868686868686869	4.435898937636657e-17	0.0	0.01804620922198056	2
-0.07676767676767676	-0.07272727272727272	7.713112758052906e-16	0.0	0.0178712373457504	2
-0.07676767676767676	-0.07676767676767676	3.7790827450492164e-15	0.0	0.017696265469520238	2
-0.07676767676767676	-0.0808080808080808	1.0444539811601136e-14	0.0	0.017521293593290077	2
-0.07676767676767676	-0.08484848484848485	2.960302822588301e-14	0.0	0.017346321717059916	2
-0.07676767676767676	-0.08888888888888889	8.309376736453213e-14	0.0	0.017171349840829755	2
-0.07676767676767676	-0.09292929292929293	2.425107728567777e-13	0.0	0.016996377964599595	2
-0.07676767676767676	-0.09696969696969697	7.220635324305783e-13	0.0	0.016821406088369434	2
-0.07676767676767676	-0.10101010101010101	1.9419791183830645e-12	0.0	0.016646434212139273	2
-0.07676767676767676	-0.10505050505050505	1.1831664638639302e-12	1.0	0.05208883852476972	2
-0.07676767676767676	-0.10909090909090909	1.69340855797535e-13	1.0	0.05191386664853956	2
-0.07676767676767676	-0.11313131313131314	2.876834905760929e-14	1.0	0.0517388947723094	2
-0.07676767676767676	-0.11717171717171718	3.681487061285689e-15	1.0	0.05156392289607924	2
-0.07676767676767676	-0.12121212121212122	3.481406663551277e-16	1.0	0.051388951019849076	2
-0.07676767676767676	-0.12525252525252525	6.328538655314117e-17	1.0	0.051213979143618915	2
-0.07676767676767676	-0.1292929292929293	1.3173013818558772e-15	1.0	0.051039007267388754	2
-0.07676767676767676	-0.13333333333333333	5.919596553755297e-14	1.0	0.050864035391158594	2
-0.07676767676767676	-0.13737373737373737	5.63950387404441e-12	1.0	0.05068906351492843	2
-0.07676767676767676	-0.1414141414141414	1.6557471031528314e-10	1.0	0.05051409163869827	2
-0.07676767676767676	-0.14545454545454545	1.1120042889275256e-09	1.0	0.05033911976246811	2
-0.07676767676767676	-0.1494949494949495	3.807350699466378e-09	1.0	0.05016414788623795	2
-0.07676767676767676	-0.15353535353535352	1.1843305859056044e-08	1.0	0.04998917601000779	2
-0.07676767676767676	-0.15757575757575756	2.685339361827823e-08	1.0	0.04981420413377763	2
-0.07676767676767676	-0.1616161616161616	5.057538193817651e-09	2.0	0.08525660844640807	2
-0.07676767676767676	-0.16565656565656567	7.088524586361578e-10	2.0	0.08508163657017791	2
-0.07676767676767676	-0.1696969696969697	2.416190544092456e-10	2.0	0.08490666469394775	2
-0.07676767676767676	-0.17373737373737375	5.098759658851942e-11	2.0	0.08473169281771759	2
-0.07676767676767676	-0.17777777777777778	3.2565810381613976e-12	2.0	0.08455672094148743	2
-0.07676767676767676	-0.18181818181818182	2.853783129865206e-12	2.0	0.08438174906525726	2
-0.07676767676767676	-0.18585858585858586	1.5126497642110406e-10	2.0	0.08420677718902711	2
-0.07676767676767676	-0.1898989898989899	7.927664481056822e-09	2.0	0.08403180531279696	2
-0.07676767676767676	-0.19393939393939394	3.6682260542356123e-07	2.0	0.08385683343656679	2
-0.07676767676767676	-0.19797979797979798	8.824824193494466e-06	2.0	0.08368186156033662	2
-0.07676767676767676	-0.20202020202020202	3.0821691215259856e-05	2.0	0.08350688968410647	2
-0.07676767676767676	-0.20606060606060606	5.402725482706123e-06	3.0	0.11894929399673691	2
-0.07676767676767676	-0.2101010101010101	6.133928871473301e-06	3.0	0.11877432212050676	2
-0.07676767676767676	-0.21414141414141413	2.8031549936290556e-06	3.0	0.11859935024427659	2
-0.07676767676767676	-0.21818181818181817	1.4350207509692324e-07	4.0	0.15385170739202067	2
-0.07676767676767676	-0.2222222222222222	4.718566887769362e-09	4.0	0.1536767355157905	2
-0.07676767676767676	-0.22626262626262628	1.2454350582723437e-10	4.0	0.15350176363956033	2
-0.07676767676767676	-0.23030303030303031	3.001587072024249e-11	4.0	0.15332679176333017	2
-0.07676767676767676	-0.23434343434343435	3.798909831167067e-10	4.0	0.1531518198871	2
-0.07676767676767676	-0.2383838383838384	1.2093795053632733e-08	4.0	0.15297684801086986	2
-0.07676767676767676	-0.24242424242424243	8.332327222364123e-08	4.0	0.1528018761346397	2
-0.07676767676767676	-0.24646464646464647	2.402297123374355e-07	4.0	0.15262690425840952	2
-0.07676767676767676	-0.2505050505050505	2.012248592498659e-06	4.0	0.15245193238217938	2
-0.07676767676767676	-0.2545454545454545	1.4605859921750945e-06	5.0	0.18789433669480982	2
-0.07676767676767676	-0.2585858585858586	1.4497299928621924e-07	5.0	0.18771936481857965	2
-0.07676767676767676	-0.26262626262626265	1.0522248682621079e-08	5.0	0.18754439294234948	2
-0.07676767676767676	-0.26666666666666666	2.627238797047362e-10	5.0	0.1873694210661193	2
-0.07676767676767676	-0.27070707070707073	5.7468108726426196e-12	5.0	0.18719444918988917	2
-0.07676767676767676	-0.27474747474747474	2.8583309658736345e-12	5.0	0.187019477313659	2
-0.07676767676767676	-0.2787878787878788	2.8459604042071623e-11	5.0	0.18684450543742884	2
-0.07676767676767676	-0.2828282828282828	2.7934223747328208e-11	5.0	0.18666953356119867	2
-0.07676767676767676	-0.2868686868686869	2.2927674935148343e-10	5.0	0.18649456168496853	2
-0.07676767676767676	-0.2909090909090909	5.21146254380291e-10	6.0	0.221936965997599	2
-0.07676767676767676	-0.29494949494949496	1.3330161230971384e-10	6.0	0.22176199412136882	2
-0.07676767676767676	-0.298989898989899	2.8501219061729944e-11	6.0	0.22158702224513865	2
-0.07676767676767676	-0.30303030303030304	2.8008292838330254e-12	6.0	0.2214120503689085	2
-0.07676767676767676	-0.30707070707070705	5.547023334274841e-13	6.0	0.22123707849267832	2
-0.07676767676767676	-0.3111111111111111	1.0266044833257277e-13	6.0	0.22106210661644815	2
-0.07676767676767676	-0.3151515151515151	6.680550600338142e-14	6.0	0.22107718190510442	2
-0.07676767676767676	-0.3191919191919192	4.2886963322357747e-13	6.0	0.22090221002887425	2
-0.07676767676767676	-0.3232323232323232	9.423422986953344e-12	6.0	0.22072723815264408	2
-0.07676767676767676	-0.32727272727272727	4.482558277961593e-12	7.0	0.2561696424652745	2
-0.07676767676767676	-0.33131313131313134	6.903704401955889e-13	7.0	0.25599467058904435	2
-0.07676767676767676	-0.33535353535353535	8.513271171638553e-13	7.0	0.2558196987128142	2
-0.07676767676767676	-0.3393939393939394	5.470605736008834e-12	7.0	0.255644726836584	2
-0.07676767676767676	-0.3434343434343434	1.9369632819652714e-10	1.0	0.04176549782719023	1
-0.07676767676767676	-0.3474747474747475	5.460847595484844e-10	1.0	0.04159052595096007	1
-0.07676767676767676	-0.3515151515151515	1.5301745592524938e-09	1.0	0.04141555407472991	1
-0.07676767676767676	-0.35555555555555557	4.261802999808978e-09	1.0	0.04124058219849975	1
-0.07676767676767676	-0.3595959595959596	5.207548945510877e-08	1.0	0.04106561032226959	1
-0.07676767676767676	-0.36363636363636365	1.5244578658087635e-07	1.0	0.04089063844603943	1
-0.07676767676767676	-0.36767676767676766	4.4271596543744033e-07	1.0	0.04071566656980926	1
-0.07676767676767676	-0.3717171717171717	1.261509409293339e-06	1.0	0.040540694693579106	1
-0.07676767676767676	-0.37575757575757573	1.1073789763015597e-05	1.0	0.040365722817348945	1
-0.07676767676767676	-0.3797979797979798	2.008299953303762e-05	1.0	0.040190750941118784	1
-0.07676767676767676	-0.3838383838383838	2.3217533650529594e-05	1.0	0.04001577906488862	1
-0.07676767676767676	-0.3878787878787879	3.303223295782878e-07	0.0	0.0	0
-0.07676767676767676	-0.39191919191919194	3.282299117186294e-07	0.0	0.0	0
-0.07676767676767676	-0.39595959595959596	3.2835030281593126e-07	0.0	0.0	0
[truncated: 8,001 more rows]
